# Supplementary material for: Direct access to α,α-chlorofluoro arylketones via mild electrophilic heterohalogenation of arylalkynes
Source: Royal Society of Chemistry journal article supplement (doi:10.1039/d2qo00074a), 2022-01-01
Supplement: d2qo00074a1.pdf [file d2qo00074a1.pdf]

# Supporting Information

## Direct Access to $\alpha,\alpha$ -chlorofluoro Arylketones via Mild Electrophilic Heterohalogenation of Arylalkynes

Chuyuan Lin,<sup>a</sup> Lu Chen,<sup>\*a</sup> Huaping Lin,<sup>a</sup> Yibiao Li,<sup>a</sup> Chengshuo Shen,<sup>\*c</sup> and Min Zhang<sup>\*b</sup>

<sup>a</sup> School of Biotechnology and Health Science, Wuyi University, Jiangmen 529020, P. R. China

<sup>b</sup> Key Lab of Functional Molecular Engineering of Guangdong Province, School of Chemistry and Chemical Engineering, South China University of Technology, Guangzhou 510641, P. R. China

<sup>c</sup> Department of Chemistry, Zhejiang Sci-Tech University, Xiasha Campus, Hangzhou 310018, P. R. China

### Corresponding Authors

\*Email: [wychemcl@126.com](mailto:wychemcl@126.com);

\*Email: [minzhang@scut.edu.cn](mailto:minzhang@scut.edu.cn);

\*Email: [shenchengshuo@sjtu.edu.cn](mailto:shenchengshuo@sjtu.edu.cn)

### Table of Contents

|                                                  |         |
|--------------------------------------------------|---------|
| General information                              | S2      |
| Substrates Preparation                           | S3-S4   |
| Typical procedure for the synthesis of <b>2a</b> | S4      |
| Control experiments                              | S4-S8   |
| The transformation of products                   | S8      |
| Analytical data of the obtained compounds        | S8-S13  |
| Crystal data of <b>2q</b>                        | S13-S14 |
| NMR spectra of obtained compounds                | S15-S57 |
| Theoretical calculations                         | S58-S68 |
| References                                       | S68-S69 |

## General information

Chemicals and solvents were purchased from commercial sources (Energy Chemical, J&KChemic, TCI, Fluka, Acros, SCRC) and used without further purification and used as received unless noted. All products were purified by flash chromatography on silica gel. The chemical yields referred are isolated products.  $^1\text{H}$ ,  $^{13}\text{C}$  and  $^{19}\text{F}$  Nuclear Magnetic Resonance ( $^1\text{H}$ ,  $^{13}\text{C}$  and  $^{19}\text{F}$  NMR) spectra were recorded on Bruker 500 MHz NMR spectrometer using Deuterated chloroform ( $\text{CDCl}_3$ ) as solvent and tetramethylsilane (TMS) as an internal standard.  $^1\text{H}$  NMR and  $^{13}\text{C}$  NMR spectra were recorded on 500MHz MHz Bruker spectrometers. Chemical shifts were reported in parts per million (ppm,  $\delta$ ) downfield from tetramethylsilane. The used abbreviations are as follows: s (singlet), d (doublet), t (triplet), quart. (quartet), quint (quintet), m (multiplet). Multiplets which arise from accidental equality of coupling constants of magnetically non-equivalent protons are marked as virtual (virt.). High resolution mass spectra (HRMS) data were measured by ESI-microTOF II. Melting points were measured by SGW® X-4B and are not corrected. Reactions were monitored by TLC analysis using silica gel 60 Å F-254 thin layer plates and compounds were visualized with a UV light at 254 nm or 365 nm. Moreover, Aromatic Alkynes are named as **1**, the final products  $\alpha,\alpha$ -chlorofluoroketones are named **2** respectively.

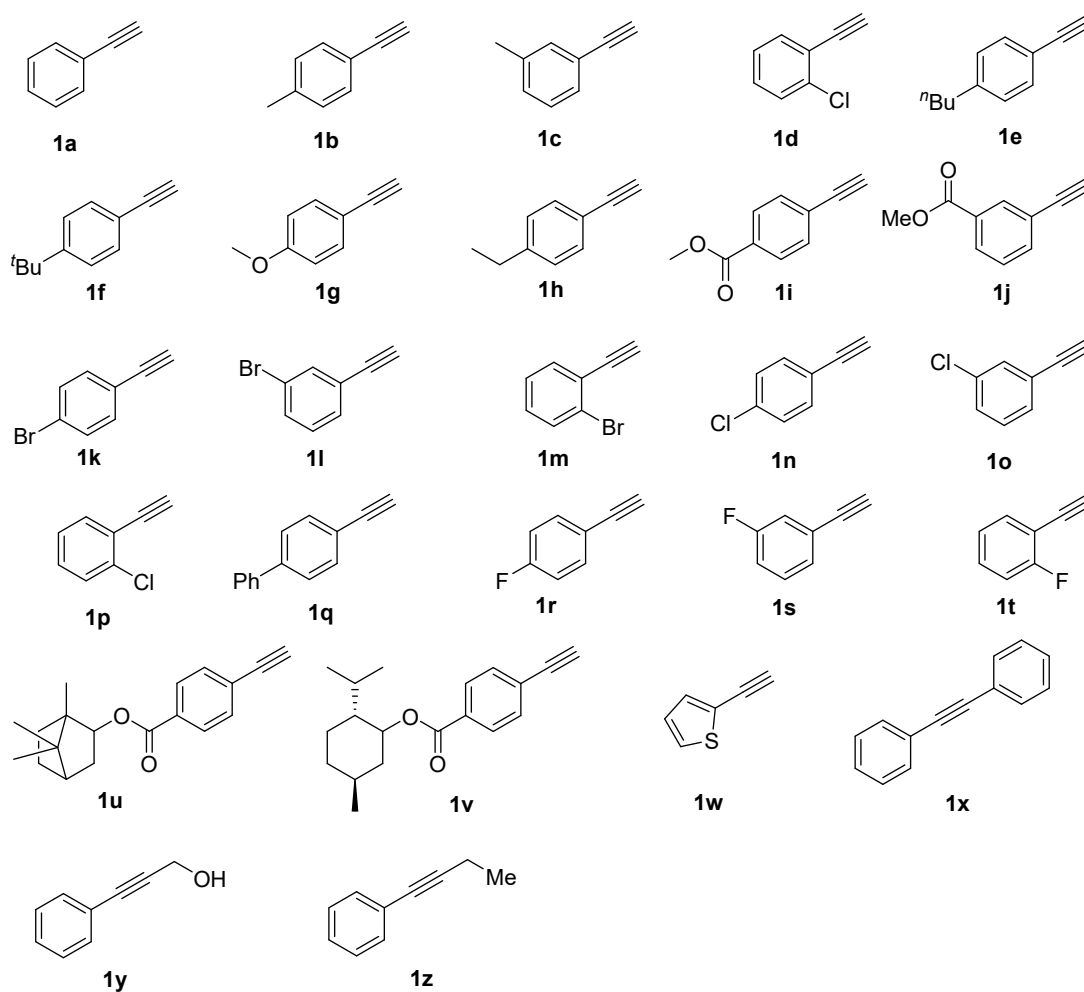

**Scheme S1.** Substrates employed for the reaction

## Substrate preparation

**Synthesis of compound 1u:** In a 25 mL round-bottom flask, L(-)-Borneol **s1** (2.0 mmol), 4-ethynyl-benzoic acid (2.4 mmol), DMAP (0.2 mmol), CH<sub>2</sub>Cl<sub>2</sub> (10 mL) and dicyclohexylcarbodiimide (4.0 mmol) were successively added. The mixture was stirred at room temperature overnight. The reaction was quenched with aqueous NH<sub>4</sub>Cl, extracted with EtOAc (3 × 30 mL). The combined ethyl acetate layer was washed with brine (10 mL) and dried over anhydrous Na<sub>2</sub>SO<sub>4</sub>. The solvent was removed under vacuum. The crude product was purified by flash column chromatography (eluting with petroleum ether/ethyl acetate = 10/1) on silica gel to afford product **1u** (384.1 mg, 68% yield) as a white solid.

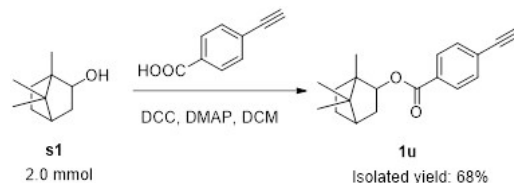

**Scheme S2.** The general procedure synthesis experiment of **1u**

**Synthesis of compound 1v:** In a 25 mL round-bottom flask, L-Menthol **s2** (2.0 mmol), 4-ethynyl-benzoic acid (2.4 mmol), DMAP (0.2 mmol), CH<sub>2</sub>Cl<sub>2</sub> (10 mL) and dicyclohexylcarbodiimide (4.0 mmol) were successively added. The mixture was stirred at room temperature overnight. The reaction was quenched with aqueous NH<sub>4</sub>Cl, extracted with EtOAc (3 × 30 mL). The combined ethyl acetate layer was washed with brine (10 mL) and dried over anhydrous Na<sub>2</sub>SO<sub>4</sub>. The solvent was removed under vacuum. The crude product was purified by flash column chromatography (eluting with petroleum ether/ethyl acetate = 10/1) on silica gel to afford product **1v** (341.3 mg, 60% yield) with light yellow liquid.

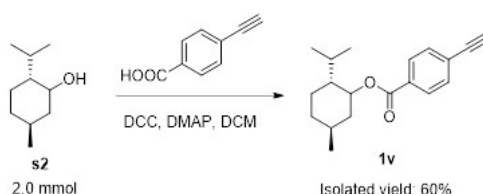

**Scheme S3.** The general procedure synthesis experiment of **1v**

### (1) 1,7,7-trimethylbicyclo[2.2.1]heptan-2-yl 4-ethynylbenzoate (**1u**)

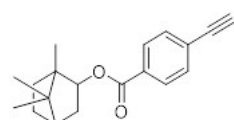

White solid (192.0 mg, 68%). MP: 83-85 °C; <sup>1</sup>H NMR (500 MHz, CDCl<sub>3</sub>) δ 8.01 (d, *J* = 8.4 Hz, 2H), 7.56 (d, *J* = 8.5 Hz, 2H), 5.11 (ddd, *J* = 10.0, 3.5, 2.2 Hz, 1H), 3.23 (s, 1H), 2.53 – 2.43 (m, 1H), 2.11 (ddd, *J* = 12.9, 9.5, 4.5 Hz, 1H), 1.81 (ttd, *J* = 12.1, 4.4, 3.2 Hz, 1H), 1.74 (t, *J* = 4.5 Hz, 1H), 1.45 – 1.37 (m, 1H), 1.31 (ddd, *J* = 12.1, 9.4, 4.4 Hz, 1H), 1.11 (dd, *J* = 13.9, 3.5 Hz, 1H), 0.96 (s, 3H), 0.91 (d, *J* = 3.5 Hz, 6H); <sup>13</sup>C NMR (125 MHz, CDCl<sub>3</sub>) δ 166.1, 132.0, 130.8, 129.4, 126.5, 82.9, 80.8, 79.9, 49.1, 47.9, 44.9, 36.9, 28.1, 27.4, 19.7, 18.9, 13.6.

### (2) (2R,5S)-2-isopropyl-5-methylcyclohexyl 4-ethynylbenzoate (**1v**)

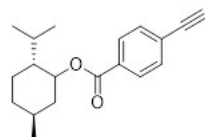

Light yellow oil (170.6 mg, 60%). <sup>1</sup>H NMR (500 MHz, CDCl<sub>3</sub>) δ 7.99 (d, *J* = 8.5 Hz, 2H), 7.54 (d, *J* = 8.4 Hz, 2H), 4.93 (td, *J* = 10.8, 4.4 Hz, 1H), 3.22 (s, 1H), 2.12 (dtd, *J* = 12.0, 4.0, 1.7 Hz, 1H), 1.94 (ddt, *J* = 14.0, 7.0, 3.5 Hz, 1H),

1.77 – 1.68 (m, 2H), 1.55 (dddd,  $J = 13.8, 12.4, 6.5, 3.3$  Hz, 2H), 1.17 – 1.05 (m, 2H), 0.92 (t,  $J = 6.5$  Hz, 7H), 0.79 (d,  $J = 7.0$  Hz, 3H);  $^{13}\text{C}$  NMR (125 MHz,  $\text{CDCl}_3$ )  $\delta$  165.4, 132.0, 130.8, 129.40, 126.5, 82.7, 79.9, 75.1, 47.2, 40.9, 34.3, 31.4, 26.5, 23.6, 22.0, 20.7, 16.5.

### Typical procedure for the synthesis of 2

**Synthesis of compound 2:** A solution of alkynes **1** (1.0 mmol), Selectfluor (2.2 mmol, 2.2 equiv), NaCl (1.2 mmol, 1.2 equiv), in  $\text{CF}_3\text{CH}_2\text{OH}/\text{H}_2\text{O}$  (2/1, 3.0 ml) were stirred under air atmosphere at 70 °C (heating mantle) for 3-4 h. After completion of the reaction, the solvent was removed under reduced pressure by rotary evaporation. Then, the product **2** was obtained by flash column chromatography on silica gel (eluent: petroleum ether/ ethyl acetate = 10:1).

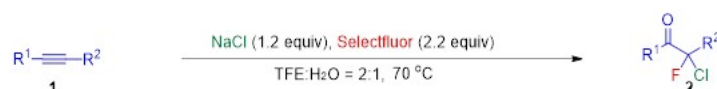

**Scheme S4.** The general procedure synthesis experiment of  $\alpha,\alpha$ -chlorofluoro ketones

### Control experiments

(1) 2,2-dichloro-1-phenylethan-1-one (**4a'**)

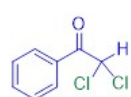

Light yellow liquid.  $^1\text{H}$  NMR (500 MHz,  $\text{CDCl}_3$ )  $\delta$  8.08 (dd,  $J = 8.4, 1.1$  Hz, 2H), 7.65 (t,  $J = 7.4$  Hz, 1H), 7.52 (t,  $J = 7.9$  Hz, 2H), 6.71 (s, 1H);  $^{13}\text{C}$  NMR (125 MHz,  $\text{CDCl}_3$ )  $\delta$  185.8, 134.5, 131.2, 129.7, 128.9, 67.7.

(2) 2-fluoro-1-phenylethan-1-one (**5a**)

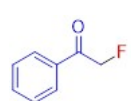

Light yellow liquid.  $^1\text{H}$  NMR (500 MHz,  $\text{CDCl}_3$ )  $\delta$  7.90 (d,  $J = 8.0$  Hz, 2H), 7.64 (t,  $J = 7.4$  Hz, 1H), 7.51 (t,  $J = 7.8$  Hz, 2H), 5.56 (d,  $J = 46.9$  Hz, 2H);  $^{13}\text{C}$  NMR (125 MHz,  $\text{CDCl}_3$ )  $\delta$  193.5 (d,  $J_{\text{C-F}} = 7.5$  Hz), 134.2, 133.7, 129.0, 127.8 (d,  $J_{\text{C-F}} = 1.3$  Hz), 83.6 (d,  $J_{\text{C-F}} = 90.6$  Hz).

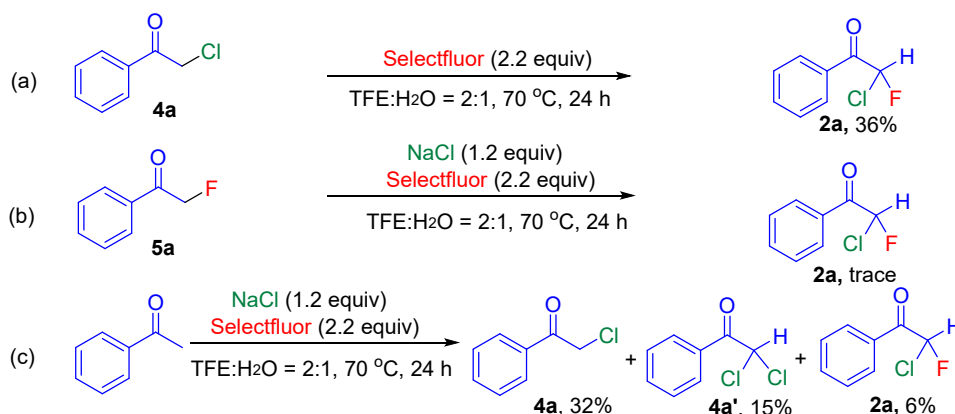

**Scheme S5.** Control experiments

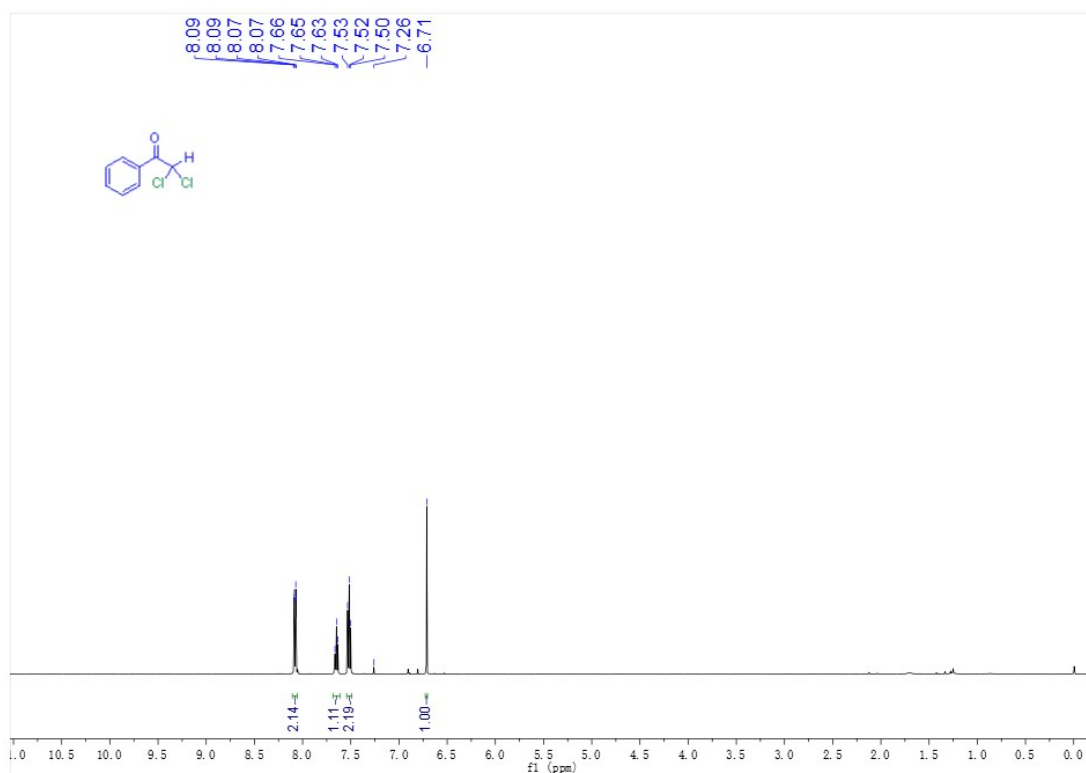

Figure S1.  $^1\text{H-NMR}$  spectrum of 4a'

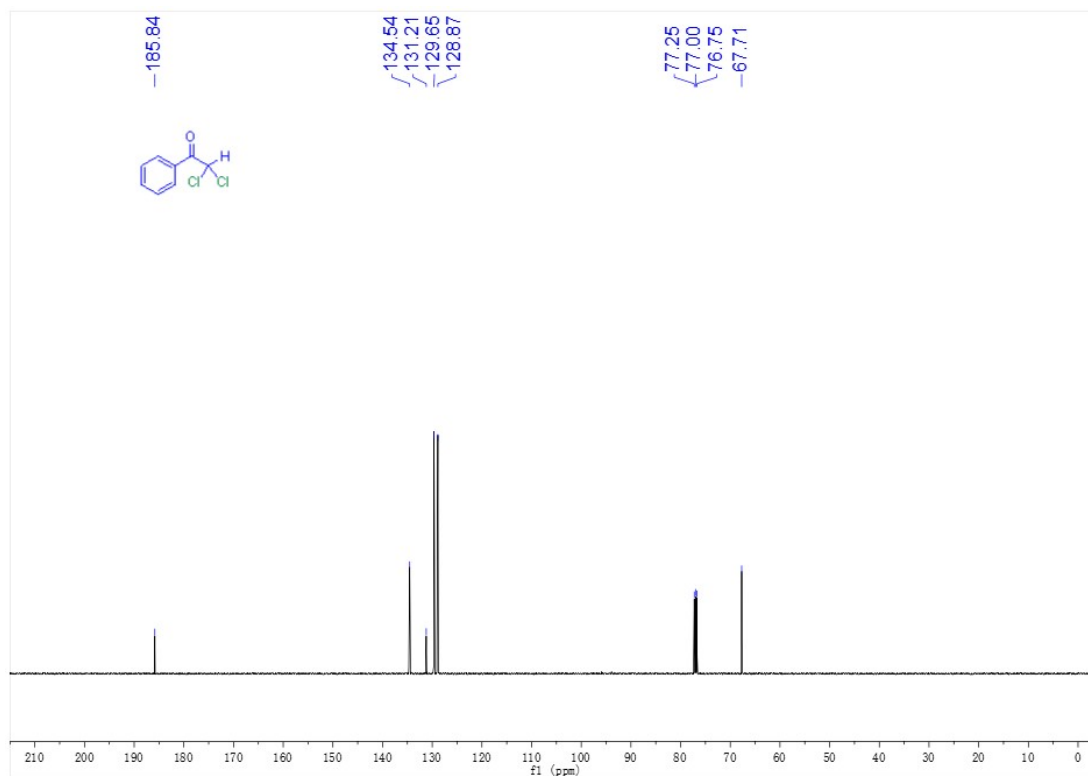

Figure S2.  $^{13}\text{C-NMR}$  spectrum of 4a'

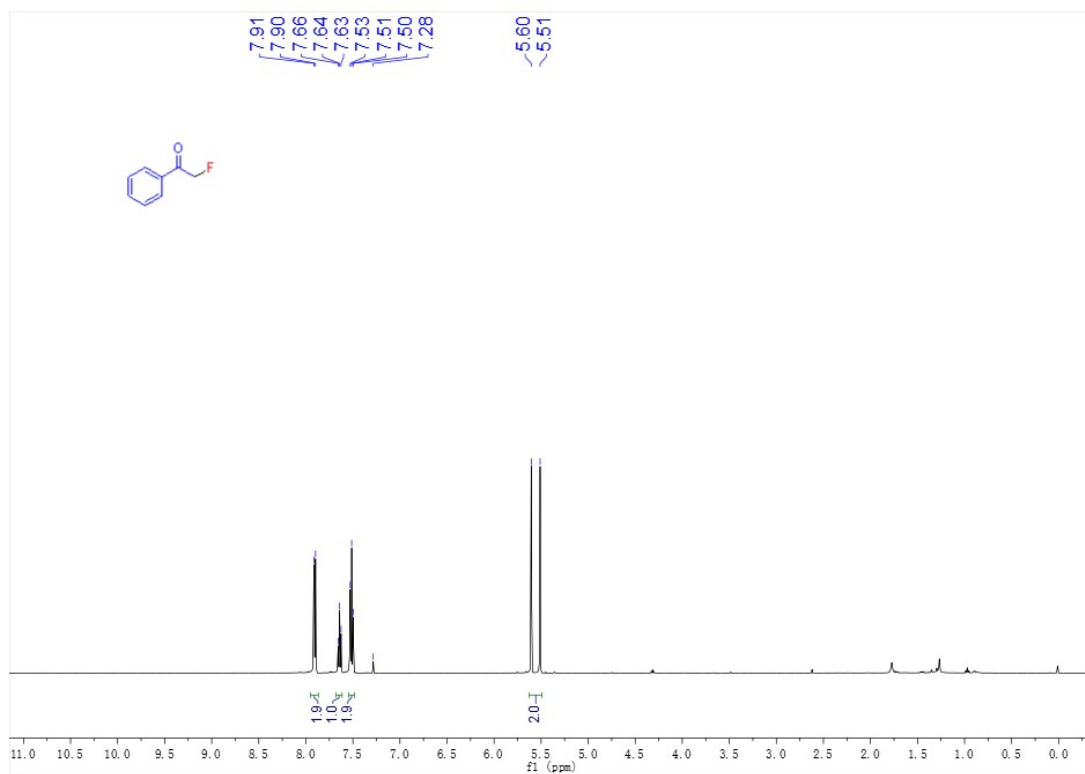

Figure S3. <sup>1</sup>H-NMR spectrum of 5a

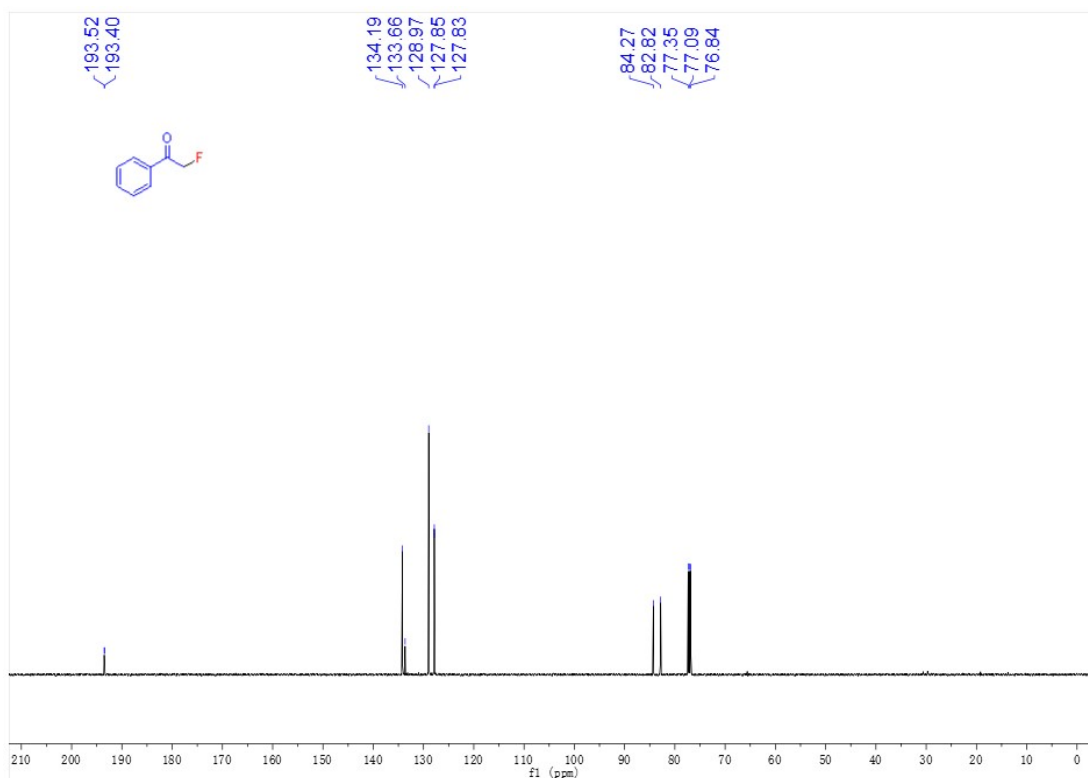

Figure S4. <sup>13</sup>C-NMR spectrum of 5a

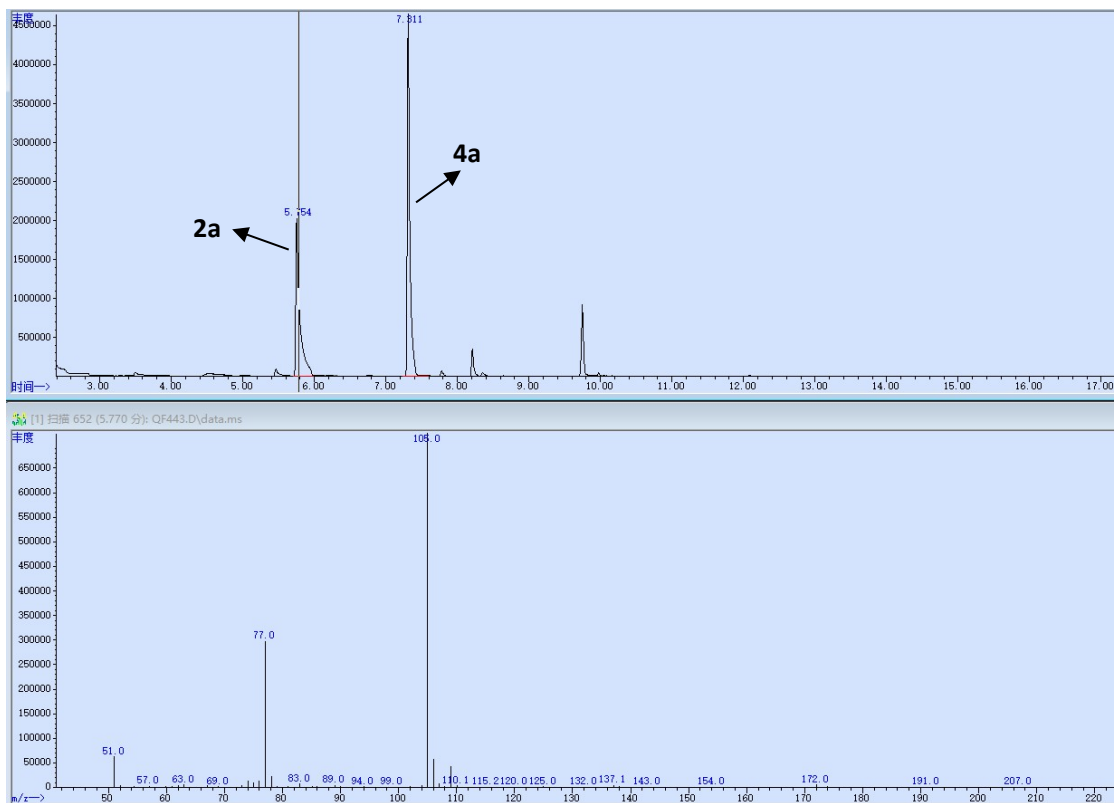

Figure S5. GC-MS analysis of control experiment (a)

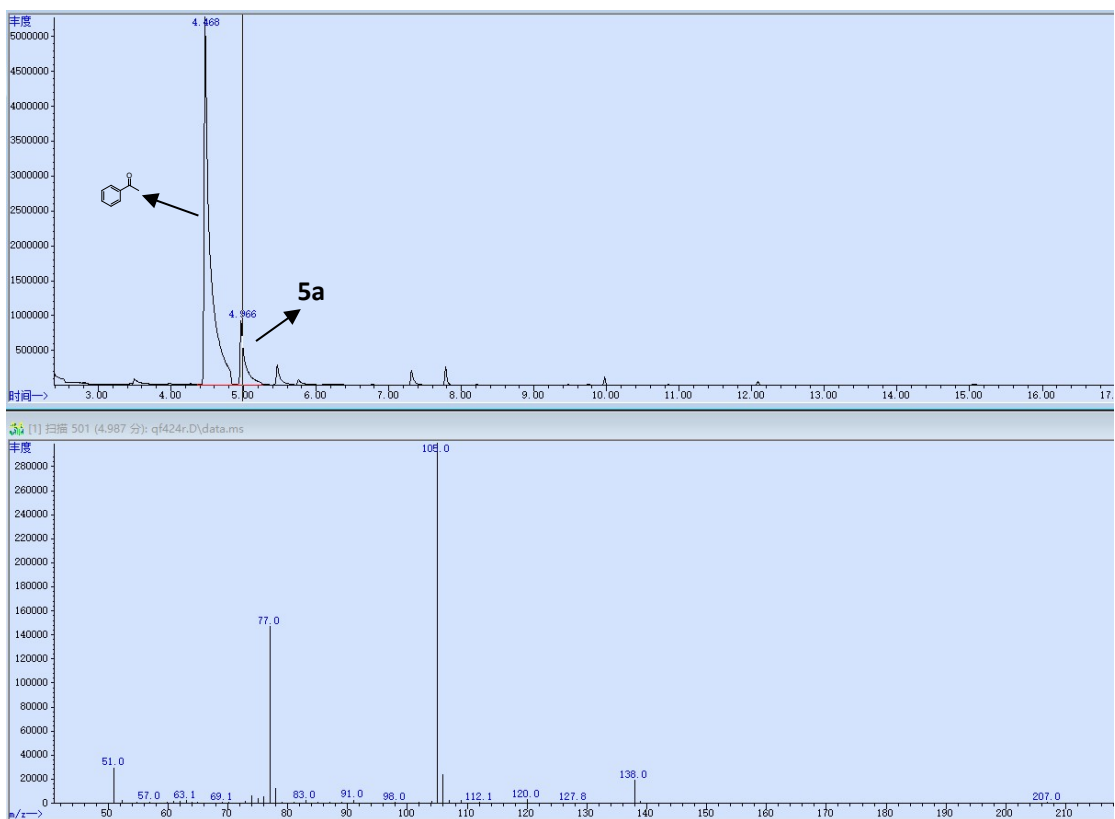

Figure S6. GC-MS analysis of control experiment (d)

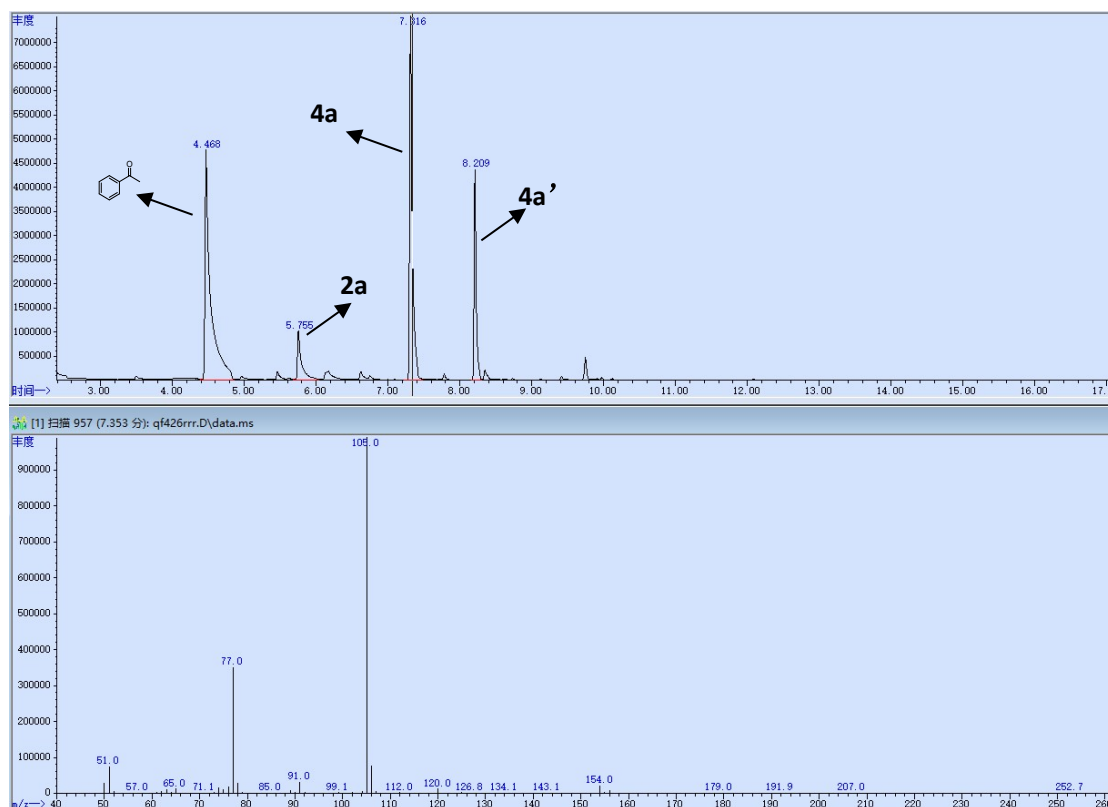

Figure S7. GC-MS analysis of control experiment (e)

## The transformation of products

### General procedure for compound 3

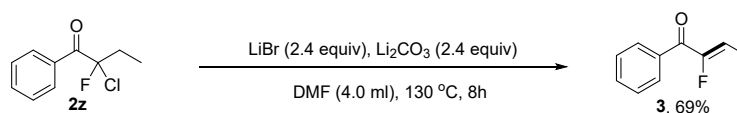

Scheme S6. The general procedure synthesis experiment of 3

**(Z)-2-fluoro-1-phenylbut-2-en-1-one:** A solution of **2z** (1.0 mmol), LiBr (2.4 mmol, 2.4 equiv), Li<sub>2</sub>CO<sub>3</sub> (2.4 mmol, 2.4 equiv), in DMF (4.0 mL) was stirred under air atmosphere at 130 °C (heating mantle) for 8 h in Fig. 5. After completion of the reaction, the solvent was removed under reduced pressure by rotary evaporation. Then, the compound **3** was obtained (113.3 mg, 69% yield) by flash column chromatography on silica gel (eluent: petroleum ether/ ethyl acetate = 5:1).

### Analytic data of the obtained compounds

#### (1) 2-chloro-2-fluoro-1-phenylethan-1-one (**2a**)

Light yellow oil (139.8 mg, 81%, purity > 99.5%). <sup>1</sup>H NMR (500 MHz, CDCl<sub>3</sub>) δ 8.07 (d, *J* = 8.2 Hz, 2H), 7.67 (t, *J* = 7.5 Hz, 1H), 7.53 (t, *J* = 7.9 Hz, 2H), 6.84 (d, *J* = 50.8 Hz, 1H); <sup>13</sup>C NMR (125 MHz, CDCl<sub>3</sub>) δ 187.3 (d, *J*<sub>C-F</sub> = 22.5 Hz), 134.7, 131.1, 129.6 (d, *J*<sub>C-F</sub> = 2.5 Hz), 128.9, 95.1 (d, *J*<sub>C-F</sub> = 256.2 Hz); <sup>19</sup>F NMR (471 MHz, CDCl<sub>3</sub>) δ -146.6 (d, *J* = 51.8 Hz, 1F). HRMS (ESI-TOF): calcd. for C<sub>8</sub>H<sub>7</sub>FCIO [M+H]<sup>+</sup>: 173.0164; found: 173.0160.



(2) 2-chloro-2-fluoro-1-(p-tolyl)ethan-1-one (**2b**)

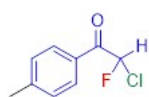

Light yellow oil (128.8 mg, 69%, purity = 99%).  $^1\text{H}$  NMR (500 MHz,  $\text{CDCl}_3$ )  $\delta$  7.96 (d,  $J = 8.2$  Hz, 2H), 7.31 (d,  $J = 8.1$  Hz, 2H), 6.82 (d,  $J = 50.8$  Hz, 1H), 2.44 (s, 3H);  $^{13}\text{C}$  NMR (125 MHz,  $\text{CDCl}_3$ )  $\delta$  186.9 (d,  $J_{\text{C-F}} = 22.5$  Hz), 146.0, 129.7 (d,  $J_{\text{C-F}} = 2.5$  Hz), 129.6, 128.6, 95.1 (d,  $J_{\text{C-F}} = 256.3$  Hz), 21.8;  $^{19}\text{F}$  NMR (471 MHz,  $\text{CDCl}_3$ )  $\delta$  -146.4 (d,  $J = 51.81$  Hz, 1F). HRMS (ESI-TOF): calcd. for  $\text{C}_9\text{H}_9\text{FClO}$  [ $\text{M}+\text{K}$ ] $^+$ : 224.9879; found: 224.9890.

(3) 2-chloro-2-fluoro-1-(m-tolyl)ethan-1-one (**2c**)

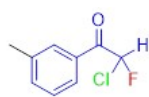

Light yellow oil (126.9 mg, 68%, purity = 99%).  $^1\text{H}$  NMR (500 MHz,  $\text{CDCl}_3$ )  $\delta$  7.85 (d,  $J = 8.2$  Hz, 2H), 7.47 (d,  $J = 7.8$  Hz, 1H), 7.40 (t,  $J = 7.6$  Hz, 1H), 6.85 (d,  $J = 50.8$  Hz, 1H), 2.43 (s, 3H);  $^{13}\text{C}$  NMR (125 MHz,  $\text{CDCl}_3$ )  $\delta$  187.4 (d,  $J_{\text{C-F}} = 22.5$  Hz), 138.9, 135.6, 131.1, 130.0 (d,  $J_{\text{C-F}} = 2.5$  Hz), 128.7, 126.8 (d,  $J_{\text{C-F}} = 2.5$  Hz), 94.9 (d,  $J_{\text{C-F}} = 255.0$  Hz), 21.3;  $^{19}\text{F}$  NMR (471 MHz,  $\text{CDCl}_3$ )  $\delta$  -146.7 (d,  $J = 51.8$  Hz, 1F). HRMS (ESI-TOF): calcd. for  $\text{C}_9\text{H}_8\text{FClO}$  [ $\text{M} + \text{K}$ ] $^+$ : 224.9879; found: 224.9878.

(4) 2-chloro-2-fluoro-1-(o-tolyl)ethan-1-one (**2d**)

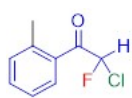

Light yellow oil (121.3 mg, 65%, purity > 99.5%).  $^1\text{H}$  NMR (500 MHz,  $\text{CDCl}_3$ )  $\delta$  7.78 (d,  $J = 7.8$  Hz, 1H), 7.48 (t,  $J = 7.1$  Hz, 1H), 7.36 – 7.28 (m, 2H), 6.82 (d,  $J = 51.0$  Hz, 1H), 2.55 (s, 3H);  $^{13}\text{C}$  NMR (125 MHz,  $\text{CDCl}_3$ )  $\delta$  189.7 (d,  $J_{\text{C-F}} = 21.3$  Hz), 141.0, 133.1, 132.5, 131.3, 129.2 (d,  $J_{\text{C-F}} = 3.8$  Hz), 125.7, 94.9 (d,  $J_{\text{C-F}} = 256.3$  Hz), 21.4;  $^{19}\text{F}$  NMR (471 MHz,  $\text{CDCl}_3$ )  $\delta$  -145.2 (d,  $J = 47.1$  Hz, 1F). HRMS (ESI-TOF): calcd. for  $\text{C}_9\text{H}_8\text{FClO}$  [ $\text{M}+\text{Na}$ ] $^+$ : 209.0140; found: 209.0134.

(5) 1-(4-butylphenyl)-2-chloro-2-fluoroethan-1-one (**2e**)

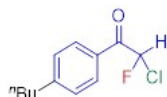

Light yellow oil (162.4 mg, 71%, purity > 99.5%).  $^1\text{H}$  NMR (500 MHz,  $\text{CDCl}_3$ )  $\delta$  7.98 (d,  $J = 8.2$  Hz, 2H), 7.32 (d,  $J = 8.3$  Hz, 2H), 6.83 (d,  $J = 50.8$  Hz, 1H), 2.69 (t,  $J = 10.0$  Hz, 2H), 1.63 (m, 2H), 1.37 (m, 2H), 0.94 (t,  $J = 7.4$  Hz, 3H);  $^{13}\text{C}$  NMR (125 MHz,  $\text{CDCl}_3$ )  $\delta$  187.0 (d,  $J_{\text{C-F}} = 21.3$  Hz), 150.9, 129.8 (d,  $J_{\text{C-F}} = 2.5$  Hz), 129.0, 128.8, 95.2 (d,  $J_{\text{C-F}} = 256.3$  Hz), 35.8, 33.0, 22.3, 13.8;  $^{19}\text{F}$  NMR (471 MHz,  $\text{CDCl}_3$ )  $\delta$  -146.3 (d,  $J = 51.81$  Hz, 1F). HRMS (ESI-TOF): calcd. for  $\text{C}_{12}\text{H}_{14}\text{FClO}$  [ $\text{M}+\text{Na}$ ] $^+$ : 251.0609; found: 251.0606.

(6) 1-(4-(tert-butyl)phenyl)-2-chloro-2-fluoroethan-1-one (**2f**)

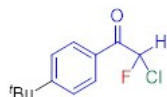

Light yellow oil (148.6 mg, 65%, purity = 98%).  $^1\text{H}$  NMR (500 MHz,  $\text{CDCl}_3$ )  $\delta$  8.01 (d,  $J = 8.3$  Hz, 2H), 7.53 (d,  $J = 8.7$  Hz, 2H), 6.83 (d,  $J = 50.8$  Hz, 1H), 1.35 (s, 9H);  $^{13}\text{C}$  NMR (125 MHz,  $\text{CDCl}_3$ )  $\delta$  186.9 (d,  $J_{\text{C-F}} = 22.5$  Hz), 158.9, 129.6 (d,  $J_{\text{C-F}} = 2.5$  Hz), 128.5, 125.9, 95.2 (d,  $J_{\text{C-F}} = 256.2$  Hz), 35.3, 30.9;  $^{19}\text{F}$  NMR (471 MHz,  $\text{CDCl}_3$ )  $\delta$  -146.4 (d,  $J = 51.8$  Hz, 1F). HRMS (ESI-TOF): calcd. for  $\text{C}_{12}\text{H}_{15}\text{FClO}$  [ $\text{M}+\text{H}$ ] $^+$ : 229.0790; found: 229.0792.

(7) 2-chloro-2-fluoro-1-(4-methoxyphenyl)ethan-1-one (**2g**)

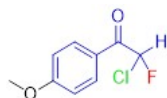

Yellow oil (156.0 mg, 77%, purity > 99.5%).  $^1\text{H}$  NMR (500 MHz,  $\text{CDCl}_3$ )  $\delta$  8.05 (d,  $J = 8.5$  Hz, 2H), 7.00 – 6.95 (m, 2H), 6.79 (d,  $J = 50.9$  Hz, 1H), 3.90 (s,

3H);  $^{13}\text{C}$  NMR (125 MHz,  $\text{CDCl}_3$ )  $\delta$  185.9 (d,  $J_{\text{C-F}} = 22.5$  Hz), 164.7, 132.1 (d,  $J_{\text{C-F}} = 2.5$  Hz), 123.9, 114.2, 95.4 (d,  $J_{\text{C-F}} = 255.0$  Hz), 55.6;  $^{19}\text{F}$  NMR (471 MHz,  $\text{CDCl}_3$ )  $\delta$  -145.5 (d,  $J = 51.8$  Hz, 1F). HRMS (ESI-TOF): calcd. for  $\text{C}_9\text{H}_9\text{FCIO}_2$   $[\text{M}+\text{H}]^+$ : 203.0270; found : 203.0270.

(8) 2-chloro-1-(4-ethylphenyl)-2-fluoroethan-1-one (**2h**)

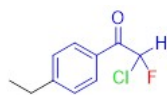

Light yellow oil (132.4 mg, 66%, purity = 99%).  $^1\text{H}$  NMR(500 MHz,  $\text{CDCl}_3$ )  $\delta$  7.99 (d,  $J = 8.2$  Hz, 2H), 7.34 (d,  $J = 8.3$  Hz, 2H), 6.82 (d,  $J = 55.0$  Hz, 1H), 2.74 (q,  $J = 7.6$  Hz, 2H), 1.27 (t,  $J = 7.6$  Hz, 3H);  $^{13}\text{C}$  NMR (125 MHz,  $\text{CDCl}_3$ )  $\delta$  188.0 (d,  $J_{\text{C-F}} = 21.2$  Hz), 152.1, 129.8 (d,  $J_{\text{C-F}} = 2.5$  Hz), 128.8, 128.4, 95.1 (d,  $J_{\text{C-F}} = 255.0$  Hz), 29.1, 15.0;  $^{19}\text{F}$  NMR (471 MHz,  $\text{CDCl}_3$ )  $\delta$  -146.4 (d,  $J = 51.8$  Hz, 1F). HRMS (ESI-TOF): calcd. for  $\text{C}_{10}\text{H}_{11}\text{FCIO}$   $[\text{M}+\text{H}]^+$ : 201.0477; found : 201.0479.

(9) methyl 4-(2-chloro-2-fluoroacetyl)benzoate (**2i**)

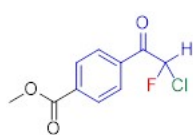

White solid (168.4 mg, 73%, purity>99.5%); MP: 77-80 °C;  $^1\text{H}$  NMR (500 MHz,  $\text{CDCl}_3$ )  $\delta$  8.20 – 8.08 (m, 4H), 6.82 (d,  $J = 50.7$  Hz, 1H), 3.96 (s, 3H);  $^{13}\text{C}$  NMR (125 MHz,  $\text{CDCl}_3$ )  $\delta$  186.92(d,  $J_{\text{C-F}} = 23.8$  Hz), 165.8, 135.2, 134.3 (d,  $J_{\text{C-F}} = 2.5$  Hz), 129.9, 129.6 (d,  $J_{\text{C-F}} = 2.5$  Hz), 95.3 (d,  $J_{\text{C-F}} = 256.3$  Hz), 52.6;  $^{19}\text{F}$  NMR (471 MHz,  $\text{CDCl}_3$ )  $\delta$  -146.6 (d,  $J = 47.1$  Hz, 1F). HRMS (ESI-TOF): calcd. for  $\text{C}_{10}\text{H}_9\text{FCIO}_3$   $[\text{M}+\text{H}]^+$  : 231.0218; found : 231.0211.

(10) methyl 3-(2-chloro-2-fluoroacetyl)benzoate (**2j**)

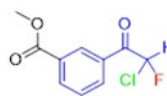

Light yellow oil (173.0 mg, 75%, purity>99.5%).  $^1\text{H}$  NMR (500 MHz,  $\text{CDCl}_3$ )  $\delta$  8.67 (s, 1H), 8.30 (d,  $J = 8.9$  Hz, 1H), 8.25 (d,  $J = 8.6$  Hz, 1H), 7.61 (t,  $J = 7.8$  Hz, 1H), 6.87 (d,  $J = 50.6$  Hz, 1H), 3.95 (d,  $J = 0.8$  Hz, 3H);  $^{13}\text{C}$  NMR (125 MHz,  $\text{CDCl}_3$ )  $\delta$  186.6 (d,  $J_{\text{C-F}} = 22.5$  Hz), 165.7, 135.4, 133.7 (d,  $J_{\text{C-F}} = 2.5$  Hz), 131.4, 131.0, 130.6 (d,  $J_{\text{C-F}} = 2.5$  Hz), 129.2, 95.1 (d,  $J_{\text{C-F}} = 256.2$  Hz), 52.6;  $^{19}\text{F}$  NMR (471 MHz,  $\text{CDCl}_3$ )  $\delta$  -146.9 (d,  $J = 51.8$  Hz, 1F). HRMS (ESI-TOF): calcd. for  $\text{C}_{10}\text{H}_9\text{FCIO}_3$   $[\text{M}+\text{H}]^+$  : 231.0219; found : 231.0219.

(11) 1-(4-bromophenyl)-2-chloro-2-fluoroethan-1-one (**2k**)

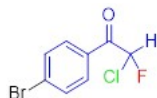

Light yellow oil (201.2 mg, 80%, purity>99.5%).  $^1\text{H}$  NMR (500 MHz,  $\text{CDCl}_3$ )  $\delta$  7.94 (d,  $J = 8.2$  Hz, 2H), 7.70 – 7.65 (m, 2H), 6.76 (d,  $J = 50.8$  Hz, 1H);  $^{13}\text{C}$  NMR (125 MHz,  $\text{CDCl}_3$ )  $\delta$  186.6 (d,  $J_{\text{C-F}} = 23.7$  Hz), 132.3, 131.1 (d,  $J_{\text{C-F}} = 2.5$  Hz), 130.3, 129.7, 95.4 (d,  $J_{\text{C-F}} = 256.2$  Hz);  $^{19}\text{F}$  NMR (471 MHz,  $\text{CDCl}_3$ )  $\delta$  -146.0 (d,  $J = 51.8$  Hz, 1F). HRMS (ESI-TOF): calcd. for  $\text{C}_8\text{H}_6\text{FCIBrO}$   $[\text{M}+\text{H}]^+$  : 250.9269; found : 250.9274.

(12) 1-(3-bromophenyl)-2-chloro-2-fluoroethan-1-one (**2l**)

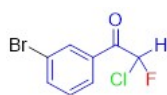

Light yellow oil (181.1 mg, 72%, purity>99.5%).  $^1\text{H}$  NMR (500 MHz,  $\text{CDCl}_3$ )  $\delta$  8.19 (s, 1H), 8.03 – 7.97 (m, 1H), 7.78 (ddd,  $J = 8.0, 1.9, 1.0$  Hz, 1H), 7.41 (t,  $J = 7.9$  Hz, 1H), 6.78 (d,  $J = 50.7$  Hz, 1H);  $^{13}\text{C}$  NMR (125 MHz,  $\text{CDCl}_3$ )  $\delta$  186.2 (d,  $J_{\text{C-F}} = 23.7$  Hz), 137.6, 132.7 (d,  $J_{\text{C-F}} = 2.5$  Hz), 132.5 (d,  $J_{\text{C-F}} = 2.5$  Hz), 130.4, 128.2 (d,  $J_{\text{C-F}} = 2.5$  Hz), 123.1, 95.2 (d,  $J_{\text{C-F}} = 256.2$  Hz);  $^{19}\text{F}$  NMR (471 MHz,  $\text{CDCl}_3$ )  $\delta$  -145.4 (d,  $J = 51.8$  Hz, 1F). HRMS (ESI-TOF): calcd. for  $\text{C}_8\text{H}_6\text{FCIBrO}$   $[\text{M}+\text{H}]^+$  : 250.9269; found : 250.9275.

(13) 1-(2-bromophenyl)-2-chloro-2-fluoroethan-1-one (**2m**)

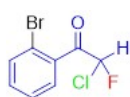

Light yellow oil (188.6 mg, 75%, purity = 98%).  $^1\text{H}$  NMR (500 MHz,  $\text{CDCl}_3$ )  $\delta$  7.67 (dd,  $J = 7.7, 1.3$  Hz, 1H), 7.58 (dd,  $J = 7.5, 1.9$  Hz, 1H), 7.47 – 7.38 (m, 2H), 6.96 (d,  $J = 50.5$  Hz, 1H);  $^{13}\text{C}$  NMR (125 MHz,  $\text{CDCl}_3$ )  $\delta$  190.7 (d,  $J_{\text{C-F}} = 23.7$  Hz), 135.4, 133.9, 133.2, 130.3 (d,  $J_{\text{C-F}} = 2.5$  Hz), 127.5, 119.8, 94.6 (d,  $J_{\text{C-F}} = 256.2$  Hz);  $^{19}\text{F}$  NMR (471 MHz,  $\text{CDCl}_3$ )  $\delta$  -145.7 (d,  $J = 51.8$  Hz, 1F). HRMS (ESI-TOF): calcd. for  $\text{C}_8\text{H}_6\text{FClBrO}$   $[\text{M}+\text{H}]^+$  : 250.0469; found : 250.0475.

(14) 2-chloro-1-(4-chlorophenyl)-2-fluoroethan-1-one (**2n**)

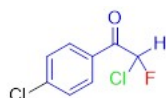

Light yellow oil (157.3 mg, 76%, purity = 98%).  $^1\text{H}$  NMR (500 MHz,  $\text{CDCl}_3$ )  $\delta$  8.02 (d,  $J = 8.2$  Hz, 2H), 7.54 – 7.45 (m, 2H), 6.77 (d,  $J = 50.8$  Hz, 1H);  $^{13}\text{C}$  NMR (125 MHz,  $\text{CDCl}_3$ )  $\delta$  186.3 (d,  $J_{\text{C-F}} = 22.5$  Hz), 141.4, 131.1, 131.1, 129.3, 95.4 (d,  $J_{\text{C-F}} = 256.2$  Hz);  $^{19}\text{F}$  NMR (471 MHz,  $\text{CDCl}_3$ )  $\delta$  -145.9 (d,  $J = 51.8$  Hz, 1F). HRMS (ESI-TOF): calcd. for  $\text{C}_8\text{H}_6\text{FCl}_2\text{O}$   $[\text{M}+\text{H}]^+$  : 206.9774; found : 206.9773.

(15) 2-chloro-1-(3-chlorophenyl)-2-fluoroethan-1-one (**2o**)

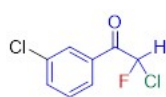

Light yellow oil (128.4 mg, 62%, purity > 99.5%).  $^1\text{H}$  NMR (500 MHz,  $\text{CDCl}_3$ )  $\delta$  8.04 (s, 1H), 7.96 (d,  $J = 7.7$  Hz, 1H), 7.63 (d,  $J = 7.6$  Hz, 1H), 7.47 (t,  $J = 7.9$  Hz, 1H), 6.78 (d,  $J = 50.7$  Hz, 1H);  $^{13}\text{C}$  NMR (125 MHz,  $\text{CDCl}_3$ )  $\delta$  186.3 (d,  $J_{\text{C-F}} = 23.8$  Hz), 135.3, 134.6, 132.6, 130.2, 129.6 (d,  $J_{\text{C-F}} = 2.5$  Hz), 127.7 (d,  $J_{\text{C-F}} = 2.5$  Hz), 96.3 (d,  $J_{\text{C-F}} = 256.3$  Hz);  $^{19}\text{F}$  NMR (471 MHz,  $\text{CDCl}_3$ )  $\delta$  -146.3 (d,  $J = 51.81$  Hz, 1F). HRMS (ESI-TOF): calcd. for  $\text{C}_8\text{H}_6\text{FCl}_2\text{O}$   $[\text{M}+\text{Na}]^+$  : 228.9594; found : 228.9588.

(16) 2-chloro-1-(2-chlorophenyl)-2-fluoroethan-1-one (**2p**)

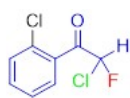

Light yellow oil (128.4 mg, 62%, purity > 99.5%).  $^1\text{H}$  NMR (500 MHz,  $\text{CDCl}_3$ )  $\delta$  7.68 – 7.64 (m, 1H), 7.53 – 7.45 (m, 2H), 7.40 (td,  $J = 7.7, 1.6$  Hz, 1H), 7.00 (d,  $J = 50.5$  Hz, 1H);  $^{13}\text{C}$  NMR (125 MHz,  $\text{CDCl}_3$ )  $\delta$  190.0 (d,  $J_{\text{C-F}} = 23.7$  Hz), 133.4, 133.3, 131.9, 130.7, 130.6 (d,  $J_{\text{C-F}} = 2.5$  Hz), 127.1, 95.1 (d,  $J_{\text{C-F}} = 255.0$  Hz);  $^{19}\text{F}$  NMR (471 MHz,  $\text{CDCl}_3$ )  $\delta$  -145.9 (d,  $J = 51.8$  Hz, 1F). HRMS (ESI-TOF): calcd. for  $\text{C}_8\text{H}_5\text{FCl}_2\text{O}$   $\text{Na}[\text{M} + \text{Na}]^+$  : 228.9594; found : 228.9596.

(17) 1-([1,1'-biphenyl]-4-yl)-2-chloro-2-fluoroethan-1-one (**2q**)

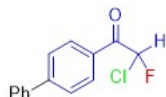

White solid (184.0 mg, 74%, purity = 99%); MP: 77-80 °C;  $^1\text{H}$  NMR (500 MHz,  $\text{CDCl}_3$ )  $\delta$  8.15 (d,  $J = 8.2$  Hz, 2H), 7.76 – 7.72 (m, 2H), 7.64 (dt,  $J = 8.3, 1.8$  Hz, 2H), 7.52 – 7.47 (m, 2H), 7.46 – 7.41 (m, 1H), 6.86 (d,  $J = 50.8$  Hz, 1H);  $^{13}\text{C}$  NMR (125 MHz,  $\text{CDCl}_3$ )  $\delta$  186.9 (d,  $J_{\text{C-F}} = 22.5$  Hz), 147.4, 139.3, 130.3 (d,  $J_{\text{C-F}} = 2.5$  Hz), 129.7, 129.1, 128.7, 127.5, 127.3, 95.3 (d,  $J_{\text{C-F}} = 255.0$  Hz);  $^{19}\text{F}$  NMR (471 MHz,  $\text{CDCl}_3$ )  $\delta$  -146.3 (d,  $J = 47.1$  Hz, 1F). HRMS (ESI-TOF): calcd. for  $\text{C}_{14}\text{H}_{11}\text{FClO}$   $[\text{M}+\text{H}]^+$  : 249.0477; found : 249.0476.

(18) 2-chloro-2-fluoro-1-(4-fluorophenyl)ethan-1-one (**2r**)

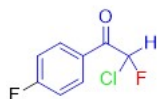

Light yellow oil (135.3 mg, 71%, purity > 99.5%).  $^1\text{H}$  NMR (500 MHz,  $\text{CDCl}_3$ )  $\delta$  8.16 – 8.10 (m, 2H), 7.23 – 7.17 (m, 2H), 6.76 (d,  $J = 50.8$  Hz, 1H);  $^{13}\text{C}$  NMR (125 MHz,  $\text{CDCl}_3$ )  $\delta$  186.0 (d,  $J_{\text{C-F}} = 23.7$  Hz), 166.6 (d,  $J_{\text{C-F}} = 256.2$  Hz), 132.6 (dd,  $J_{\text{C-F}} = 8.7$  Hz, 2.5 Hz), 127.4, 116.3 (d,  $J_{\text{C-F}} = 22.5$  Hz), 96.5 (d,  $J_{\text{C-F}} = 256.2$  Hz);  $^{19}\text{F}$  NMR

(471 MHz, CDCl<sub>3</sub>)  $\delta$  -101.30 – -101.25 (m, 1F), -145.5 (d,  $J$  = 51.8 Hz, 1F). HRMS (ESI-TOF): calcd. for C<sub>8</sub>H<sub>6</sub>F<sub>2</sub>ClO [M+H]<sup>+</sup> : 191.0069; found : 191.0067.

(19) 2-chloro-2-fluoro-1-(3-fluorophenyl)ethan-1-one (**2s**)

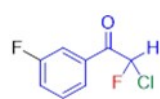

Light yellow oil (114.3 mg, 60%, purity>99.5%). <sup>1</sup>H NMR (500 MHz, CDCl<sub>3</sub>)  $\delta$  7.87 (d,  $J$  = 7.9 Hz, 1H), 7.76 (d,  $J$  = 9.2 Hz, 1H), 7.51 (td,  $J$  = 8.0, 5.5 Hz, 1H), 7.37 (tdd,  $J$  = 8.2, 2.6, 0.9 Hz, 1H), 6.78 (d,  $J$  = 50.7 Hz, 1H); <sup>13</sup>C NMR (125 MHz, CDCl<sub>3</sub>)  $\delta$  186.3 (dd,  $J_{C-F}$  = 23.8, 2.5 Hz), 162.7 (d,  $J_{C-F}$  = 247.5 Hz), 133.0 (dd,  $J_{C-F}$  = 6.3, 1.3 Hz), 130.6 (d,  $J_{C-F}$  = 7.5 Hz), 125.5 (t,  $J_{C-F}$  = 2.5 Hz), 121.9 (d,  $J_{C-F}$  = 21.3 Hz), 116.5 (dd,  $J_{C-F}$  = 23.8, 2.5 Hz), 95.3 (d,  $J_{C-F}$  = 256.3 Hz); <sup>19</sup>F NMR (471 MHz, CDCl<sub>3</sub>)  $\delta$  -110.5 – -110.6 (m, 1F), -146.3 (d,  $J$  = 51.8 Hz, 1F). HRMS (ESI-TOF): calcd. for C<sub>8</sub>H<sub>5</sub>F<sub>2</sub>ClOK [M+K]<sup>+</sup> : 228.9629; found : 228.9634.

(20) 2-chloro-2-fluoro-1-(2-fluorophenyl)ethan-1-one (**2t**)

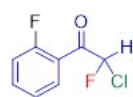

Light yellow oil (114.3 mg, 60%, purity>99.5%). <sup>1</sup>H NMR (500 MHz, CDCl<sub>3</sub>)  $\delta$  8.00 (t,  $J$  = 6.7 Hz, 1H), 7.69 – 7.58 (m, 1H), 7.32 (t,  $J$  = 7.5 Hz, 1H), 7.19 (dd,  $J$  = 10.9, 8.7 Hz, 1H), 6.98 (d,  $J$  = 50.9 Hz, 1H); <sup>13</sup>C NMR (125 MHz, CDCl<sub>3</sub>)  $\delta$  185.6 (dd,  $J_{C-F}$  = 22.5, 5.0 Hz), 161.5 (d,  $J_{C-F}$  = 253.8 Hz), 136.5 (d,  $J_{C-F}$  = 8.8 Hz), 131.7, 125.1 (d,  $J_{C-F}$  = 2.5 Hz), 120.6 (d,  $J_{C-F}$  = 12.5 Hz), 116.7 (d,  $J_{C-F}$  = 22.5 Hz), 95.2 (dd,  $J_{C-F}$  = 250.0, 12.5 Hz); <sup>19</sup>F NMR (471 MHz, CDCl<sub>3</sub>)  $\delta$  -107.5 – -107.6 (m, 1F), -148.4 (dd,  $J$  = 51.8, 9.4 Hz, 1F). HRMS (ESI-TOF): calcd. for C<sub>8</sub>H<sub>5</sub>F<sub>2</sub>ClOK[M+K]<sup>+</sup> : 228.9628; found : 228.9630.

(21) 1,7,7-trimethylbicyclo[2.2.1]heptan-2-yl 4-(2-chloro-2-fluoroacetyl)benzoate (**2u**)

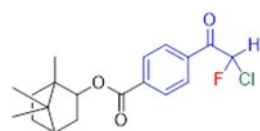

Light yellow oil (264.6 mg, 75%, purity = 98%). <sup>1</sup>H NMR (500 MHz, CDCl<sub>3</sub>)  $\delta$  8.19 (d,  $J$  = 8.7 Hz, 2H), 8.14 (d,  $J$  = 8.4 Hz, 2H), 6.82 (d,  $J$  = 50.7 Hz, 1H), 5.14 (ddd,  $J$  = 10.0, 3.5, 2.2 Hz, 1H), 2.55 – 2.45 (m, 1H), 2.10 (ddd,  $J$  = 13.5, 9.5, 4.4 Hz, 1H), 1.82 (ttd,  $J$  = 12.2, 4.5, 3.2 Hz, 1H), 1.76 (t,  $J$  = 4.5 Hz, 1H), 1.43 (dddd,  $J$  = 13.0, 12.0, 4.5, 2.2 Hz, 1H), 1.31 (ddd,  $J$  = 12.2, 9.5, 4.7 Hz, 1H), 1.13 (dd,  $J$  = 13.9, 3.5 Hz, 1H), 0.97 (s, 3H), 0.92 (d,  $J$  = 2.2 Hz, 6H); <sup>13</sup>C NMR (125 MHz, CDCl<sub>3</sub>)  $\delta$  187.0 (d,  $J_{C-F}$  = 22.5 Hz), 165.5, 136.0, 134.2 (d,  $J_{C-F}$  = 1.2 Hz), 129.8, 129.6 (d,  $J_{C-F}$  = 2.5 Hz), 95.3 (d,  $J_{C-F}$  = 255 Hz), 81.5, 49.1, 47.9, 44.9, 36.8, 28.1, 27.4, 19.7, 18.9, 13.6; <sup>19</sup>F NMR (471 MHz, CDCl<sub>3</sub>)  $\delta$  -146.5 (dd,  $J$  = 51.8, 9.4 Hz, 1F). HRMS (ESI-TOF): calcd. for C<sub>19</sub>H<sub>23</sub>FClO<sub>3</sub>[M+H]<sup>+</sup> : 353.1314 ; found : 353.1310.

(22) (2R,5S)-2-isopropyl-5-methylcyclohexyl 4-(2-chloro-2-fluoroacetyl)benzoate (**2v**)

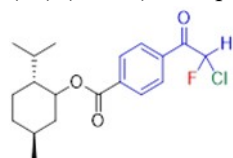

Light yellow oil (170.4 mg, 48%, purity = 97%). <sup>1</sup>H NMR (500 MHz, CDCl<sub>3</sub>)  $\delta$  8.17 (d,  $J$  = 8.6 Hz, 2H), 8.13 (d,  $J$  = 8.5 Hz, 2H), 6.82 (dd,  $J$  = 50.7, 1.4 Hz, 1H), 4.96 (td,  $J$  = 10.9, 4.4 Hz, 1H), 2.13 (dtd,  $J$  = 12.0, 4.4, 3.9, 1.8 Hz, 1H), 1.93 (ddq,  $J$  = 10.0, 7.0, 3.6, 2.8 Hz, 1H), 1.78 – 1.71 (m, 2H), 1.56 (dq,  $J$  = 12.0, 3.4 Hz, 2H), 1.18 – 1.08 (m, 2H), 0.93 (t,  $J$  = 7.3 Hz, 7H), 0.79 (d,  $J$  = 6.9 Hz, 3H); <sup>13</sup>C NMR (125 MHz, CDCl<sub>3</sub>)  $\delta$  187.00 (dd,  $J_{C-F}$  = 23.8, 1.2 Hz), 164.8, 136.0, 134.1 (d,  $J_{C-F}$  = 1.2 Hz), 129.9, 129.6 (d,  $J_{C-F}$  = 2.5 Hz), 95.3 (dd,  $J_{C-F}$  = 256.3, 5.0 Hz), 75.8, 47.2, 40.8, 34.2, 31.4, 26.5, 23.6, 22.0, 20.7, 16.5; <sup>19</sup>F NMR (471 MHz, CDCl<sub>3</sub>)  $\delta$  -146.6 (dd,  $J$  = 51.8, 23.6 Hz, 1F). HRMS (ESI-TOF): calcd. for C<sub>19</sub>H<sub>25</sub>FClO<sub>3</sub>[M+H]<sup>+</sup> : 355.1470; found : 355.1469.

(23) 2-chloro-2-fluoro-1-(thiophen-2-yl)ethan-1-one (**2w**)

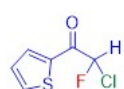

Light yellow oil (78.6 mg, 44%, purity>99.5%).  $^1\text{H}$  NMR (500 MHz,  $\text{CDCl}_3$ )  $\delta$  8.05 – 8.00 (m, 1H), 7.83 (d,  $J = 4.9$  Hz, 1H), 7.22 (t,  $J = 5.0$  Hz, 1H), 6.66 (d,  $J = 50.8$  Hz, 1H);  $^{13}\text{C}$  NMR (125 MHz,  $\text{CDCl}_3$ )  $\delta$  181.2 (d,  $J_{\text{C-F}} = 23.7$  Hz), 137.0 (d,  $J_{\text{C-F}} = 2.5$  Hz), 136.5, 135.2 (d,  $J_{\text{C-F}} = 5.0$  Hz), 128.7, 95.8 (d,  $J_{\text{C-F}} = 256.2$  Hz);  $^{19}\text{F}$  NMR (471 MHz,  $\text{CDCl}_3$ )  $\delta$  -143.6 (d,  $J = 51.8$  Hz, 1F). HRMS (ESI-TOF): calcd. for  $\text{C}_6\text{H}_5\text{FCISO}[\text{M}+\text{H}]^+$  : 178.9728; found : 178.9727.

(24) 2-chloro-2-fluoro-1,2-diphenylethan-1-one (**2x**)

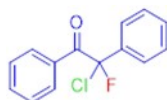

Light yellow oil (74.6 mg, 30%, purity>99.5%).  $^1\text{H}$  NMR (500 MHz,  $\text{CDCl}_3$ )  $\delta$  8.01 (d,  $J = 8.4$  Hz, 2H), 7.69 – 7.63 (m, 2H), 7.57 (t,  $J = 7.4$  Hz, 1H), 7.50 – 7.39 (m, 5H);  $^{13}\text{C}$  NMR (125 MHz,  $\text{CDCl}_3$ )  $\delta$  188.7 (d,  $J_{\text{C-F}} = 33.7$  Hz), 136.3 (d,  $J_{\text{C-F}} = 22.5$  Hz), 133.8, 132.0 (d,  $J_{\text{C-F}} = 2.5$  Hz), 130.6 (d,  $J_{\text{C-F}} = 2.5$  Hz), 130.3, 128.7, 128.4, 125.7 (d,  $J_{\text{C-F}} = 62.5$  Hz), 109.8 (d,  $J_{\text{C-F}} = 255.0$  Hz);  $^{19}\text{F}$  NMR (471 MHz,  $\text{CDCl}_3$ )  $\delta$  -106.5 (s, 1F). HRMS (ESI-TOF): calcd. for  $\text{C}_{14}\text{H}_{10}\text{FCIONa}[\text{M}+\text{Na}]^+$  : 271.0296 ; found : 271.0296.

(25) 2-chloro-2-fluoro-3-hydroxy-1-phenylpropan-1-one (**2y**)

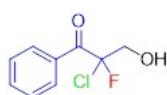

Light yellow oil (113.5 mg, 56%, purity>99.5%).  $^1\text{H}$  NMR (500 MHz,  $\text{CDCl}_3$ )  $\delta$  8.16 (d,  $J = 8.3$  Hz, 2H), 7.63 (t,  $J = 7.4$  Hz, 1H), 7.49 (t,  $J = 7.9$  Hz, 2H), 4.39 (dd,  $J = 23.6, 12.9$  Hz, 1H), 4.17 (t,  $J = 12.7$  Hz, 1H), 3.16 (s, 1H);  $^{13}\text{C}$  NMR (125 MHz,  $\text{CDCl}_3$ )  $\delta$  189.9 (d,  $J_{\text{C-F}} = 28.7$  Hz), 134.5, 131.5 (d,  $J_{\text{C-F}} = 2.5$  Hz), 130.5 (d,  $J_{\text{C-F}} = 5.0$  Hz), 128.5, 106.6 (d,  $J_{\text{C-F}} = 261.2$  Hz), 66.6 (d,  $J_{\text{C-F}} = 25.0$  Hz);  $^{19}\text{F}$  NMR (471 MHz,  $\text{CDCl}_3$ )  $\delta$  -126.3 (dd,  $J = 14.1, 23.5$  Hz, 1F). HRMS (ESI-TOF): calcd. for  $\text{C}_9\text{H}_9\text{FCIO}_2[\text{M}+\text{H}]^+$  : 203.0270 ; found : 203.0271.

(26) 2-chloro-2-fluoro-1-phenylbutan-1-one (**2z**)

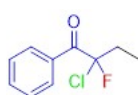

Light yellow oil (86.3 mg, 43%, purity>99.5%).  $^1\text{H}$  NMR (500 MHz,  $\text{CDCl}_3$ )  $\delta$  8.16 (d,  $J = 8.4$  Hz, 2H), 7.61 (t,  $J = 7.4$  Hz, 1H), 7.49 (t,  $J = 7.8$  Hz, 2H), 2.56 – 2.37 (m, 2H), 1.16 (t,  $J = 7.4$  Hz, 3H);  $^{13}\text{C}$  NMR (125 MHz,  $\text{CDCl}_3$ )  $\delta$  189.8 (d,  $J_{\text{C-F}} = 28.7$  Hz), 133.8, 132.0 (d,  $J_{\text{C-F}} = 2.5$  Hz), 130.5 (d,  $J_{\text{C-F}} = 5.0$  Hz), 128.4, 110.8 (d,  $J_{\text{C-F}} = 258.7$  Hz), 32.8 (d,  $J_{\text{C-F}} = 22.5$  Hz), 7.4 (d,  $J_{\text{C-F}} = 3.7$  Hz);  $^{19}\text{F}$  NMR (471 MHz,  $\text{CDCl}_3$ )  $\delta$  -116.9 (d,  $J = 18.8$  Hz, 1F). HRMS (ESI-TOF): calcd. for  $\text{C}_{10}\text{H}_{11}\text{FCIO}[\text{M}+\text{H}]^+$  : 201.0477 ; found : 201.0480.

## Crystal data of **2q**

### Crystallographic data of compound **2q**

White block-like single crystals of **2q** were grown by layering DCM at ambient temperature. An ORTEP representation of the structure is shown below.

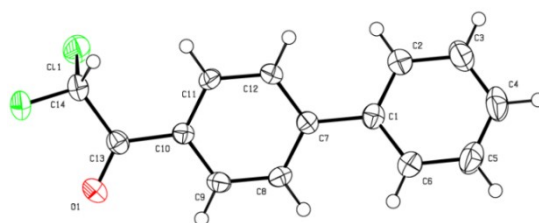

Figure S8. Molecular structure of **2q** (CCDC:2105099)

**Table S1 Crystal data and structure refinement for 2q**

|                                             |                                                               |
|---------------------------------------------|---------------------------------------------------------------|
| Identification code                         | 2q                                                            |
| Empirical formula                           | C <sub>14</sub> H <sub>10</sub> ClFO                          |
| Formula weight                              | 248.67                                                        |
| Temperature/K                               | 149.99(10)                                                    |
| Crystal system                              | monoclinic                                                    |
| Space group                                 | P2 <sub>1</sub>                                               |
| a/Å                                         | 5.1673(5)                                                     |
| b/Å                                         | 10.7029(11)                                                   |
| c/Å                                         | 10.6241(9)                                                    |
| α/°                                         | 90                                                            |
| β/°                                         | 102.439(9)                                                    |
| γ/°                                         | 90                                                            |
| Volume/Å <sup>3</sup>                       | 573.78(9)                                                     |
| Z                                           | 2                                                             |
| ρ <sub>calc</sub> /cm <sup>3</sup>          | 1.439                                                         |
| μ/mm <sup>-1</sup>                          | 0.324                                                         |
| F(000)                                      | 256.0                                                         |
| Crystal size/mm <sup>3</sup>                | 0.14 × 0.13 × 0.12                                            |
| Radiation                                   | Mo Kα (λ = 0.71073)                                           |
| 2θ range for data collection/°              | 5.468 to 59.024                                               |
| Index ranges                                | -7 ≤ h ≤ 4, -14 ≤ k ≤ 11, -11 ≤ l ≤ 13                        |
| Reflections collected                       | 2900                                                          |
| Independent reflections                     | 2014 [R <sub>int</sub> = 0.0226, R <sub>sigma</sub> = 0.0429] |
| Data/restraints/parameters                  | 2014/1/155                                                    |
| Goodness-of-fit on F <sup>2</sup>           | 1.044                                                         |
| Final R indexes [I ≥ 2σ (I)]                | R <sub>1</sub> = 0.0364, wR <sub>2</sub> = 0.0806             |
| Final R indexes [all data]                  | R <sub>1</sub> = 0.0420, wR <sub>2</sub> = 0.0848             |
| Largest diff. peak/hole / e Å <sup>-3</sup> | 0.18/-0.24                                                    |
| Flack parameter                             | 0.11(9)                                                       |

**NMR spectra of the obtained compounds****<sup>1</sup>H NMR spectrum for 2a**

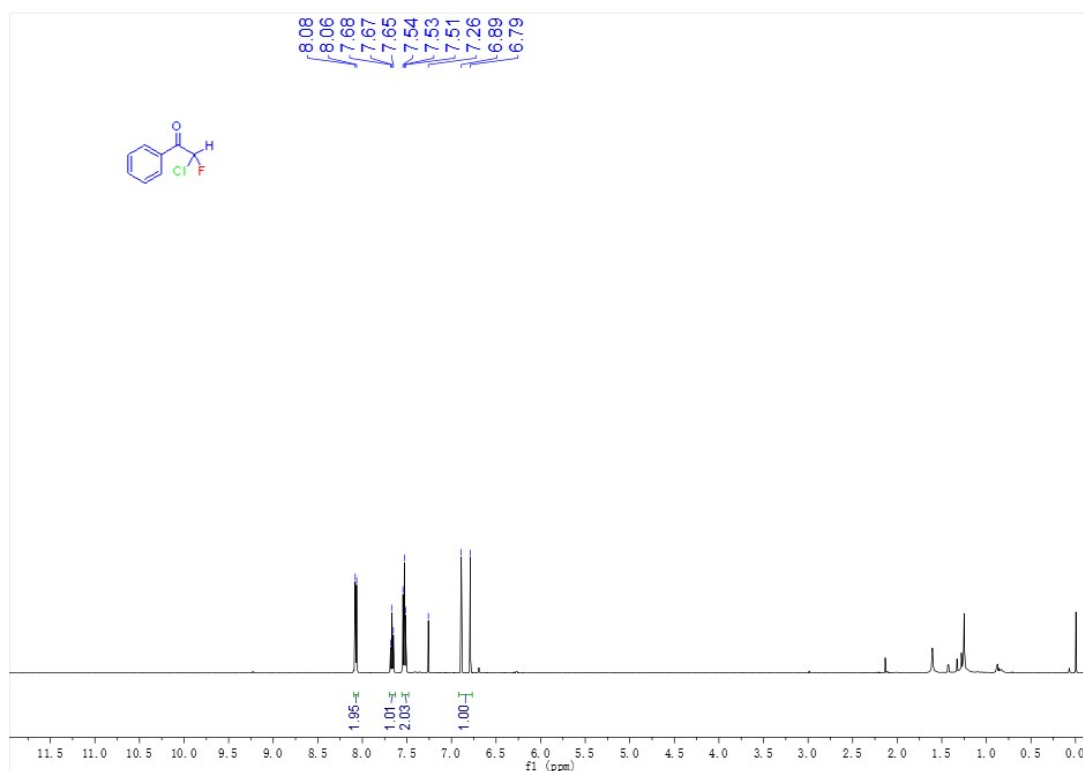

<sup>13</sup>C NMR spectrum for 2a

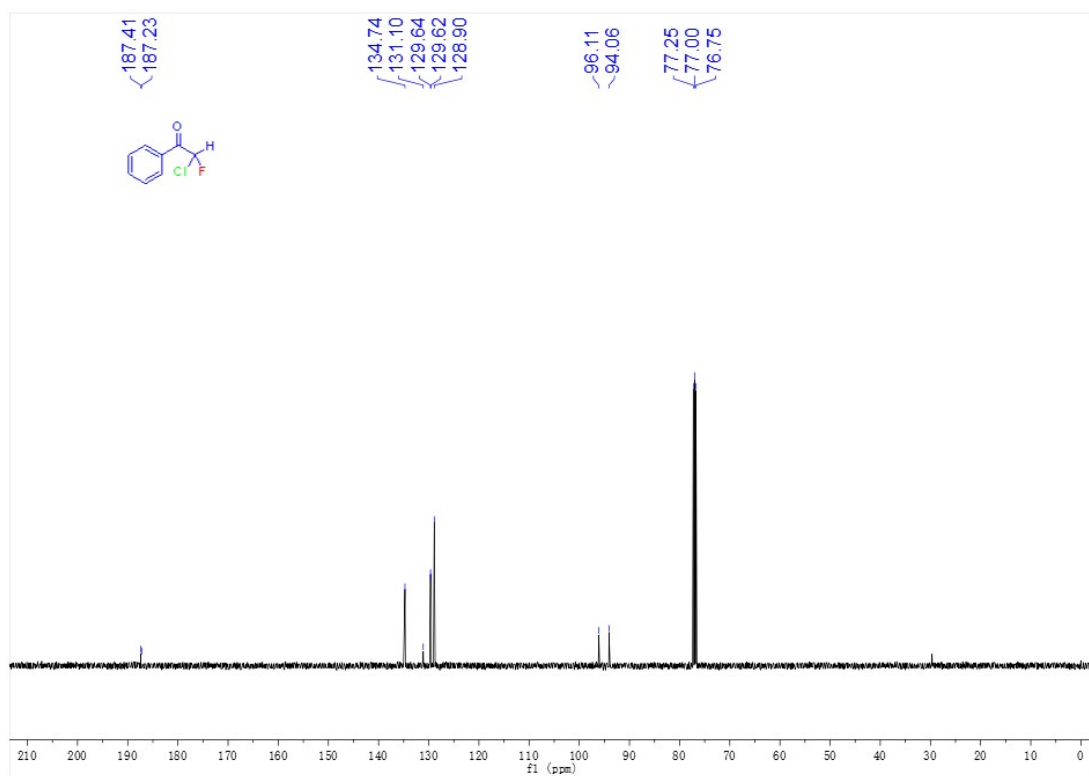

<sup>19</sup>F NMR spectrum for 2a

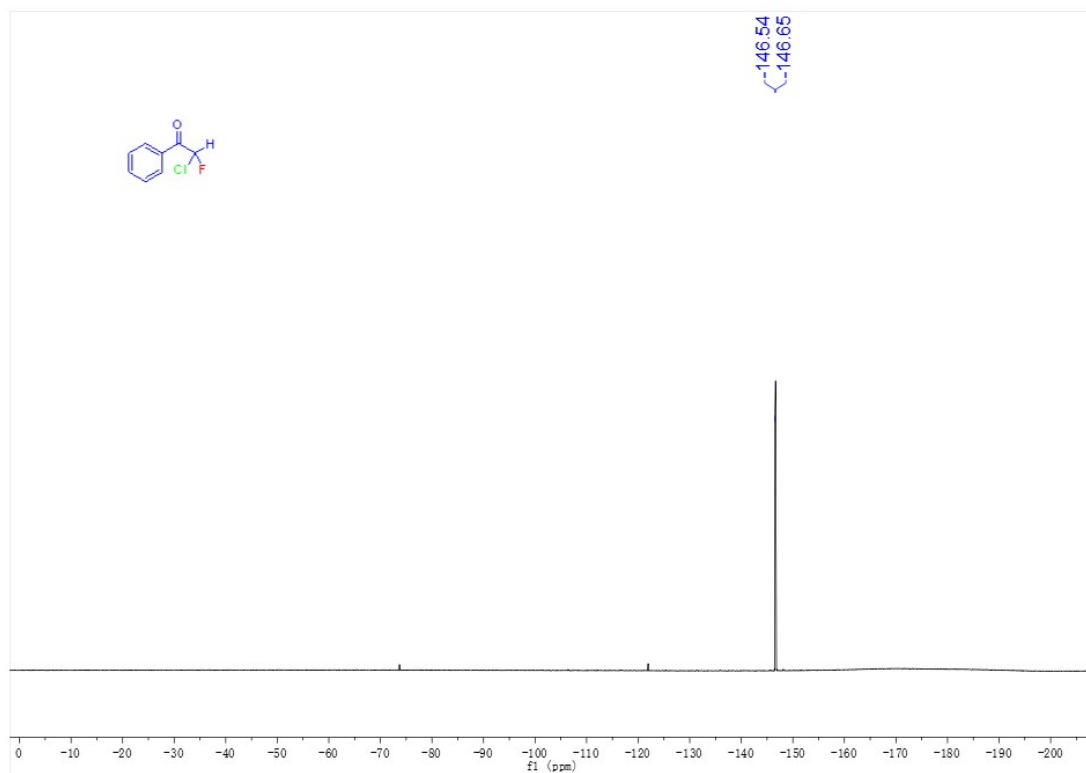

**<sup>1</sup>H NMR spectrum for 2b**

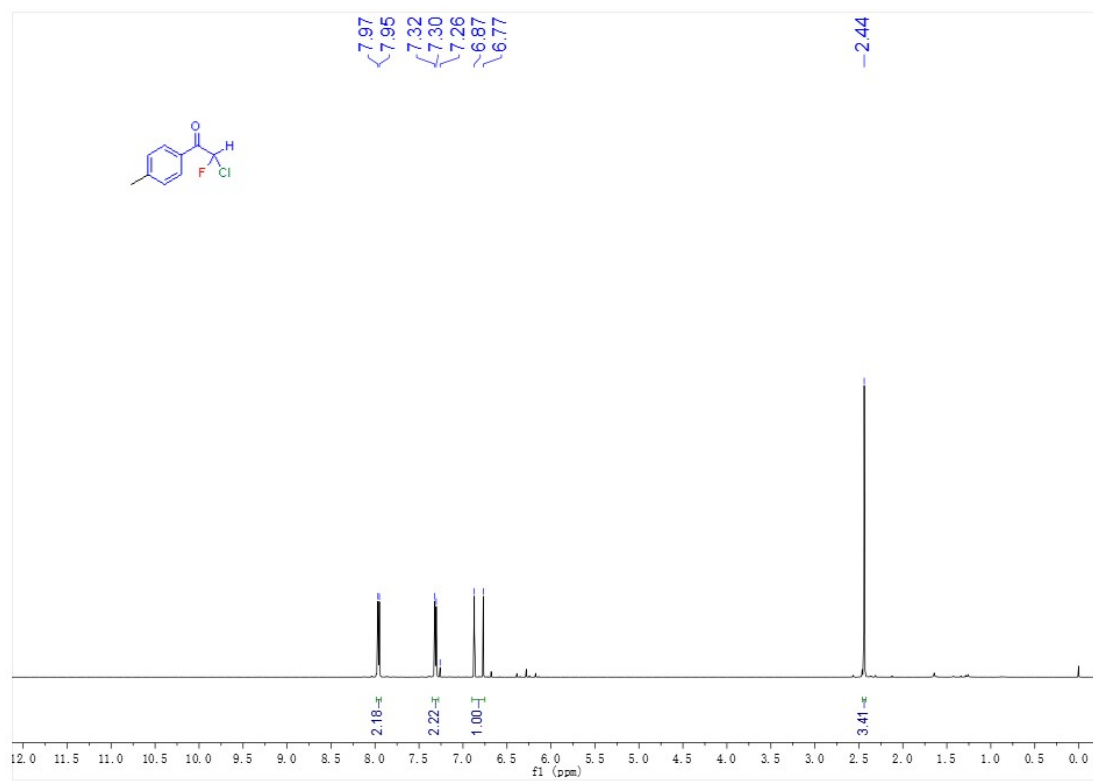

**<sup>13</sup>C NMR spectrum for 2b**



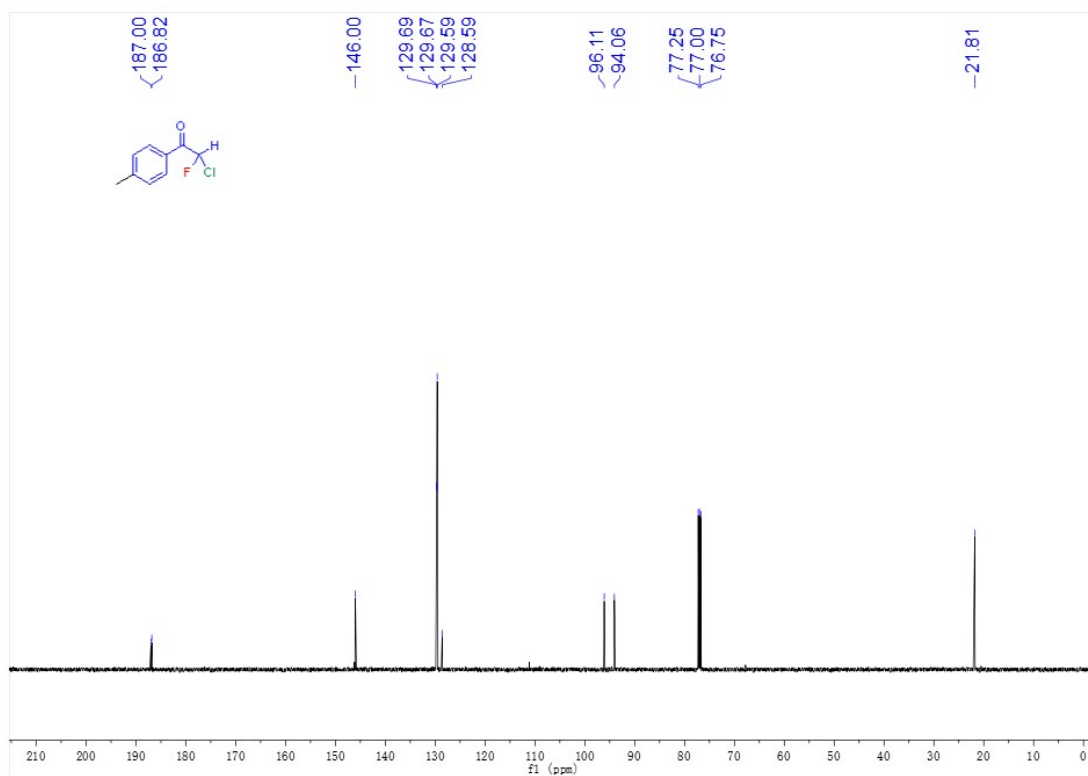

**<sup>19</sup>F NMR spectrum for 2b**

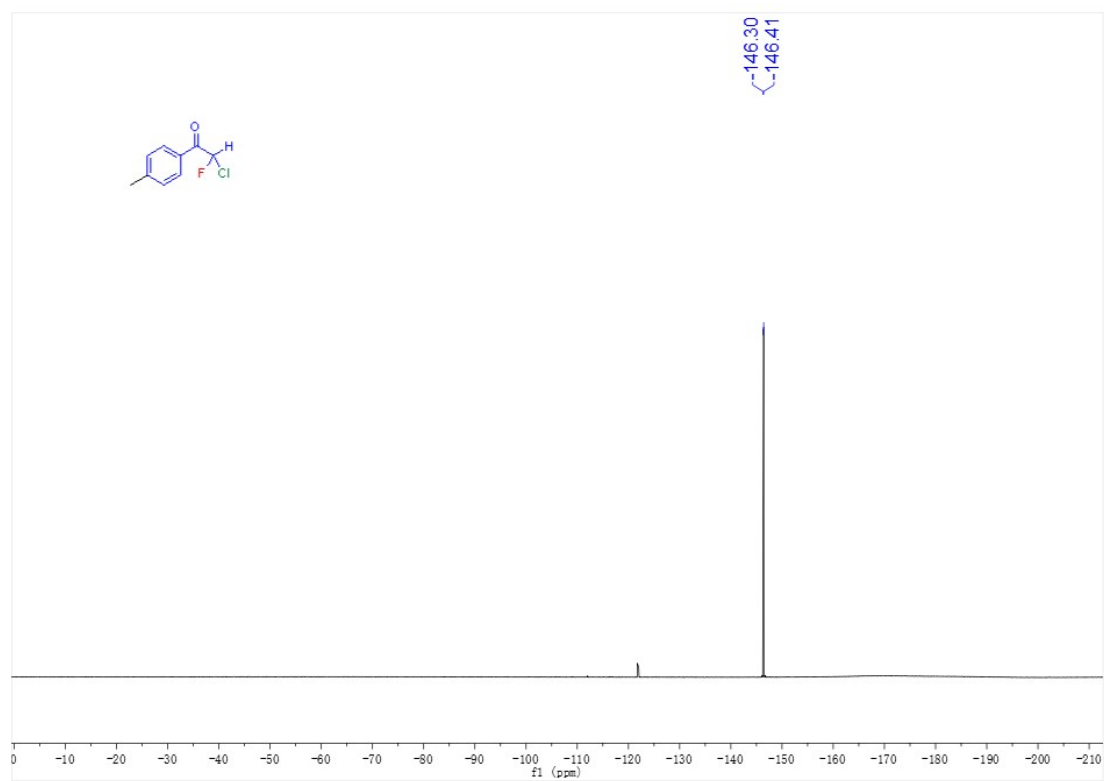

**<sup>1</sup>H NMR spectrum for 2c**

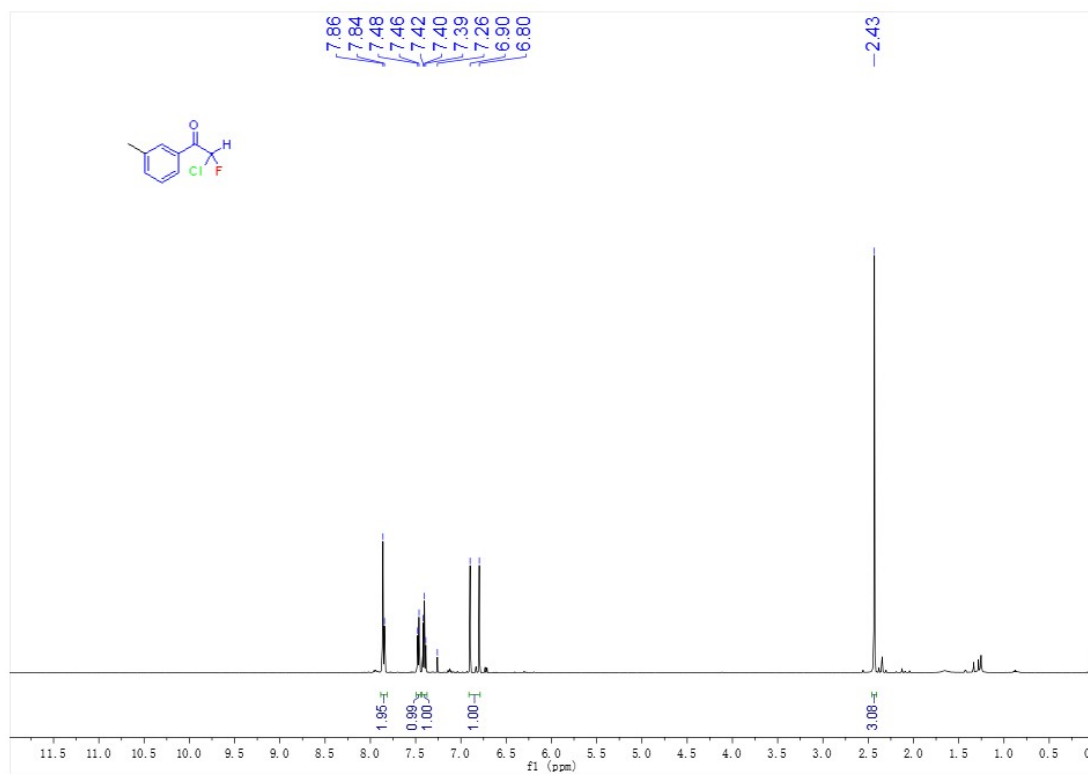

<sup>13</sup>C NMR spectrum for 2c

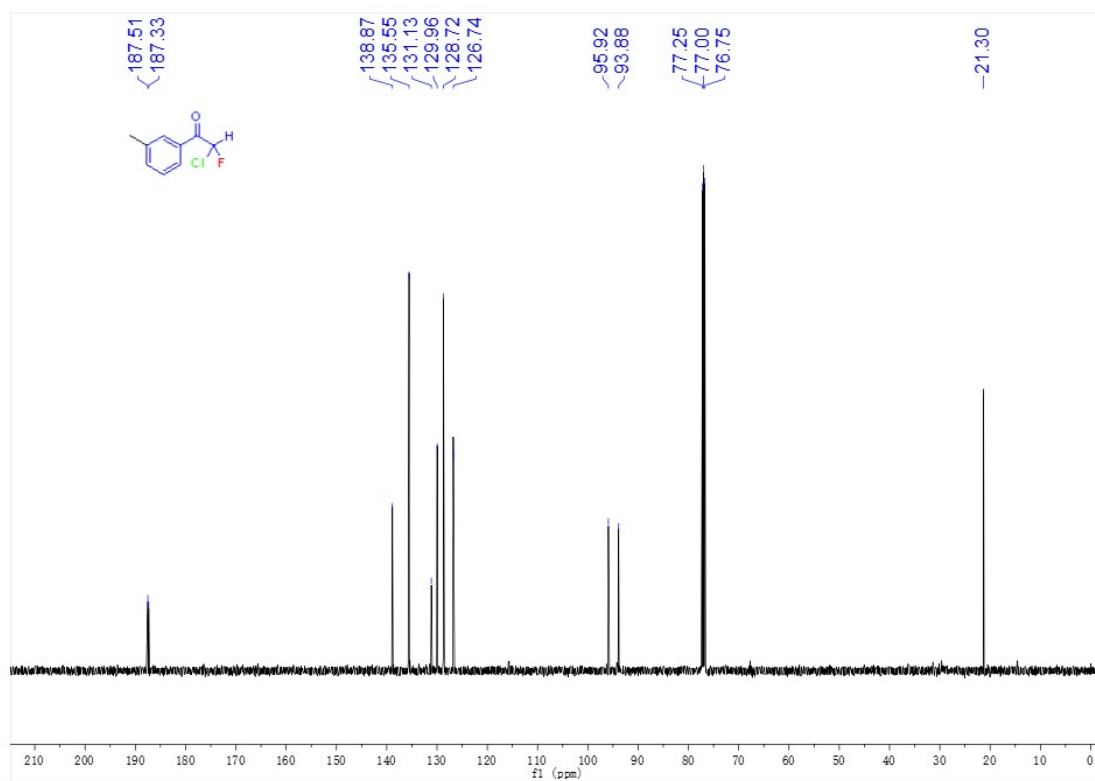

**<sup>19</sup>F NMR spectrum for 2c**

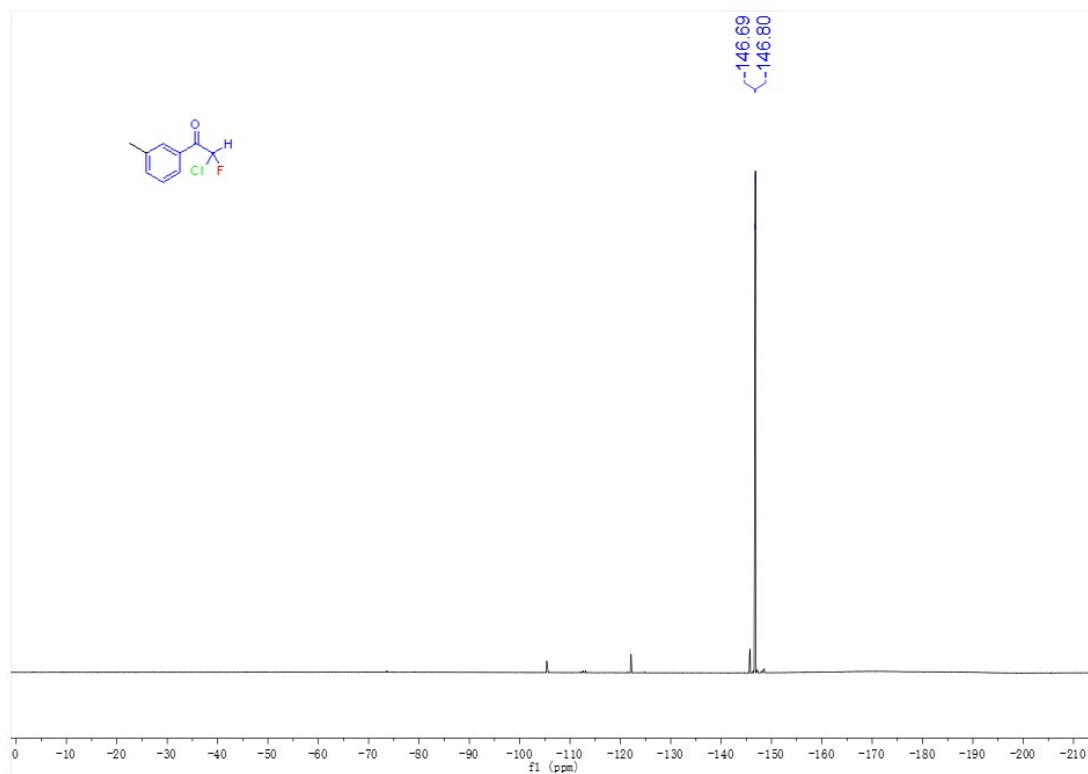

**<sup>1</sup>H NMR spectrum for 2d**

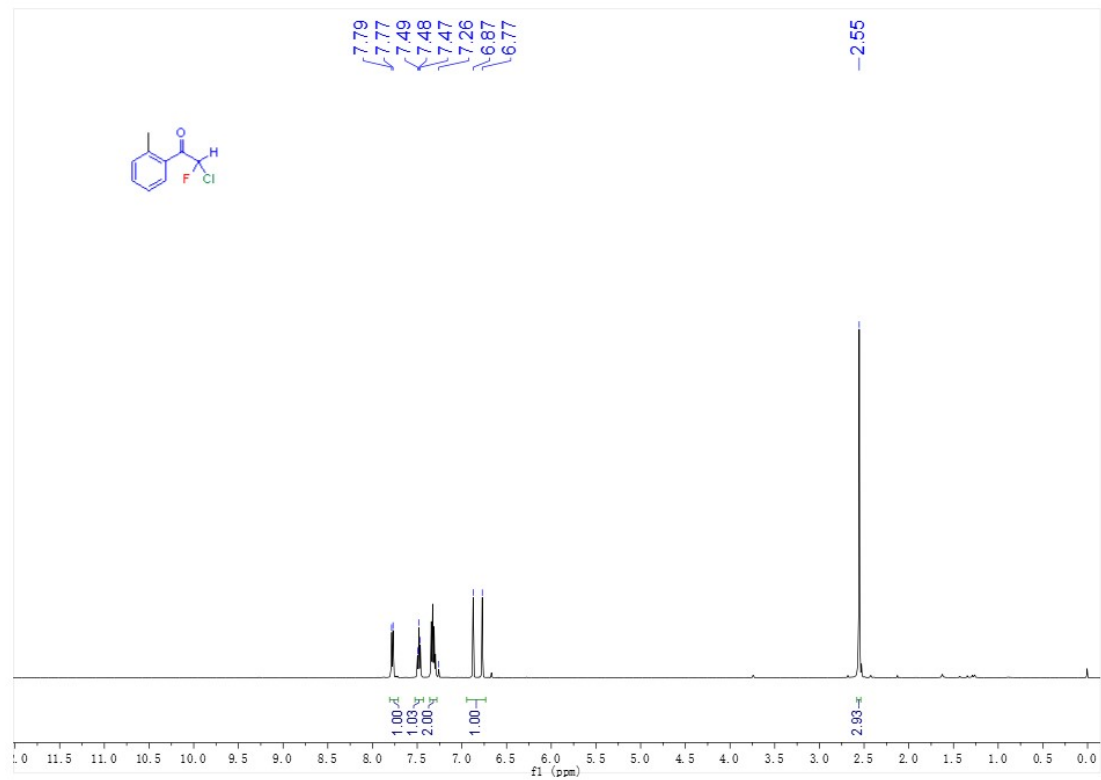

### <sup>13</sup>C NMR spectrum for 2d

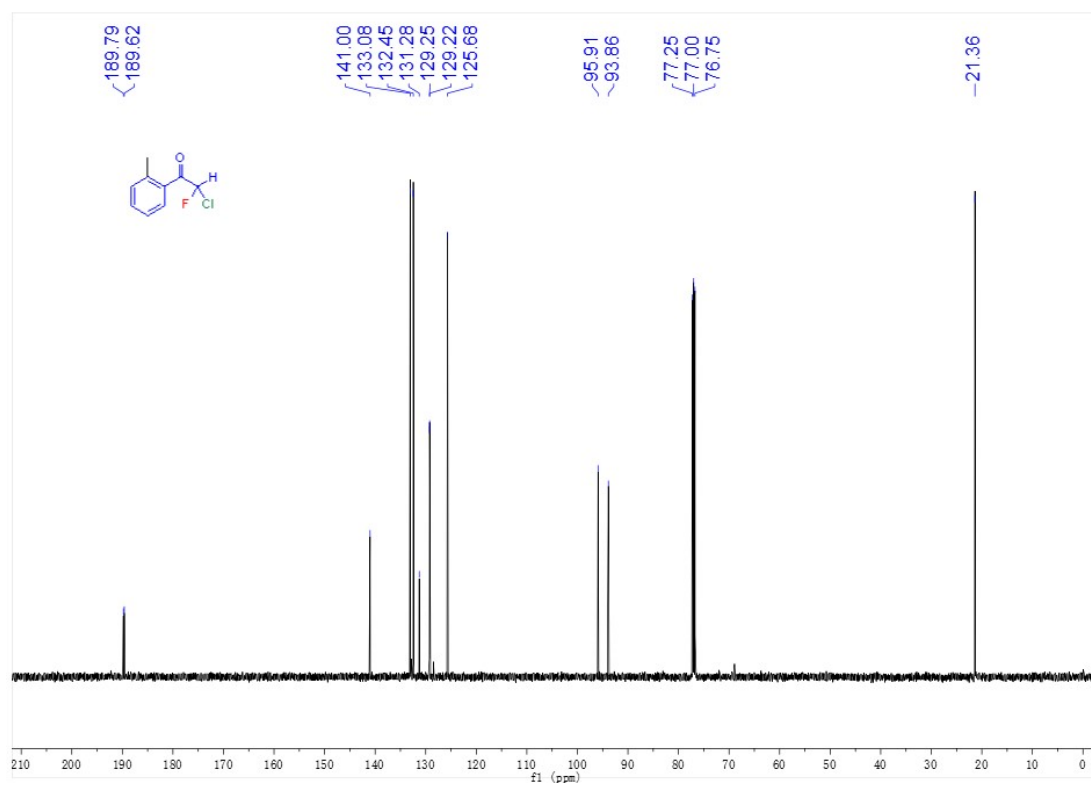

### <sup>19</sup>F NMR spectrum for 2d

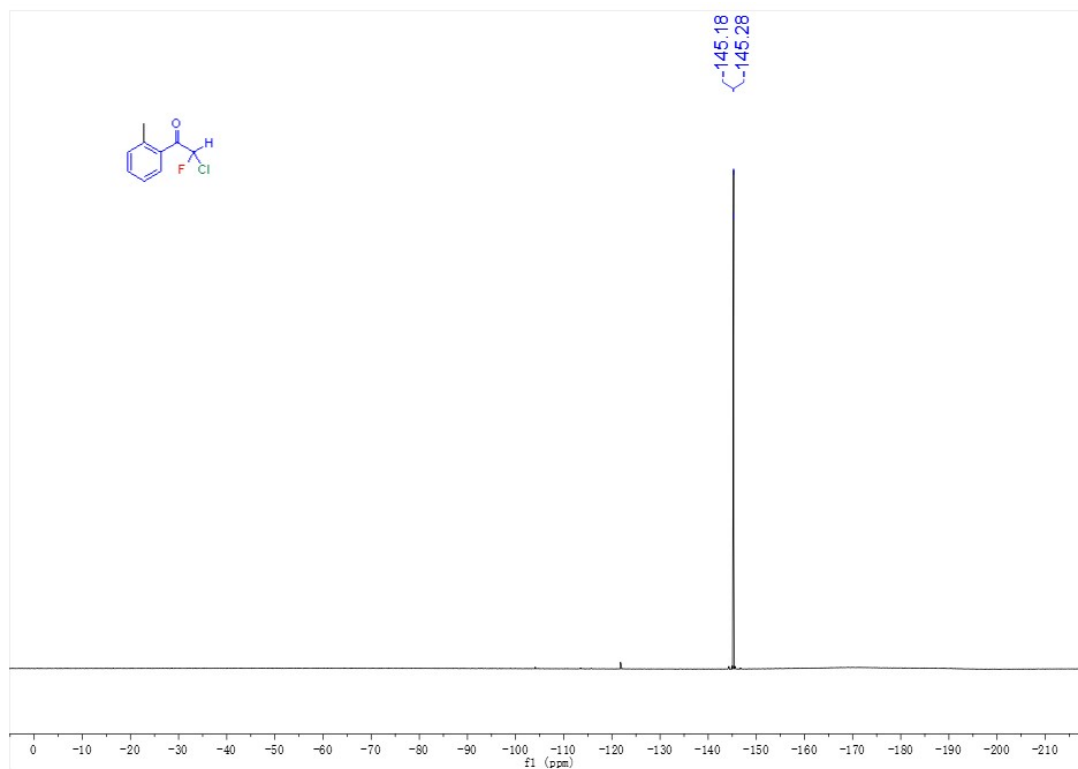

### <sup>1</sup>H NMR spectrum for 2e

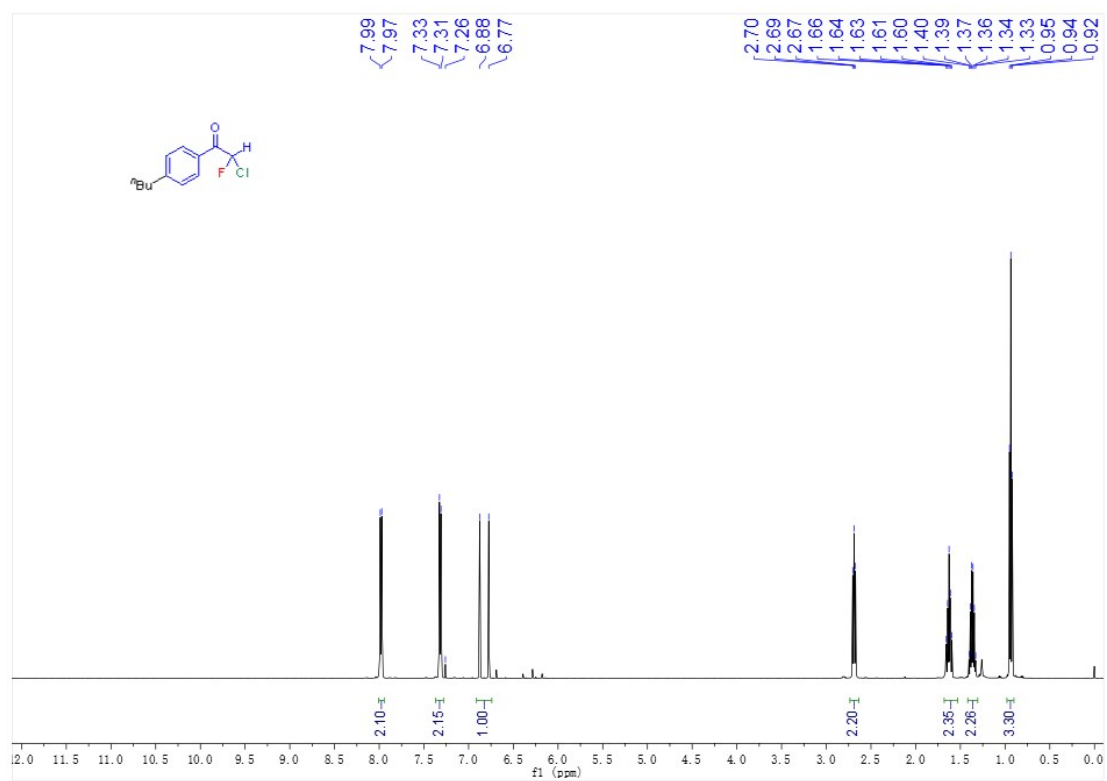

### <sup>13</sup>C NMR spectrum for 2e

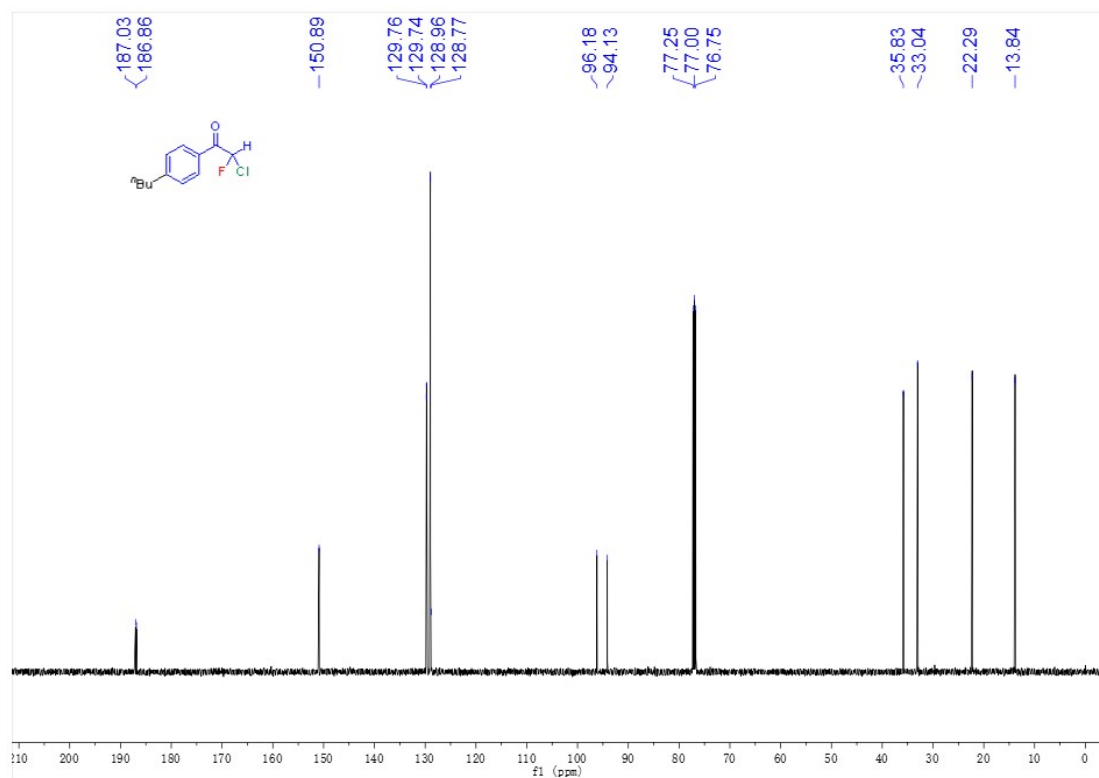

**<sup>19</sup>F NMR spectrum for 2e**

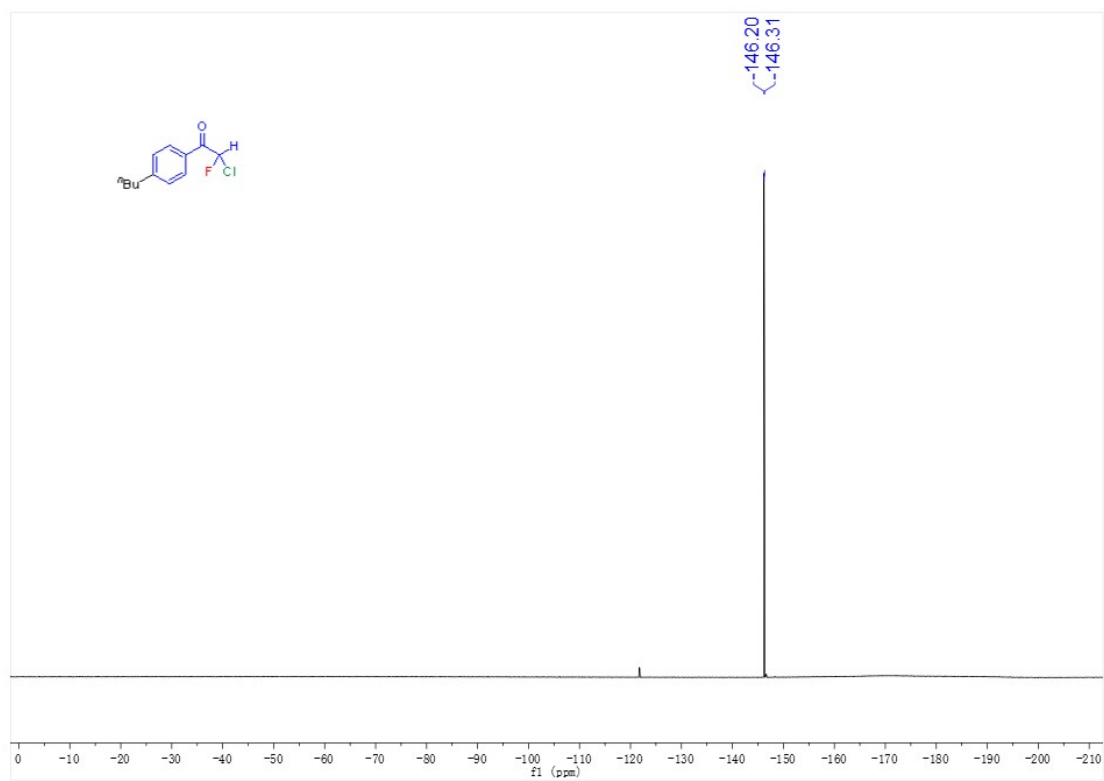

**<sup>1</sup>H NMR spectrum for 2f**

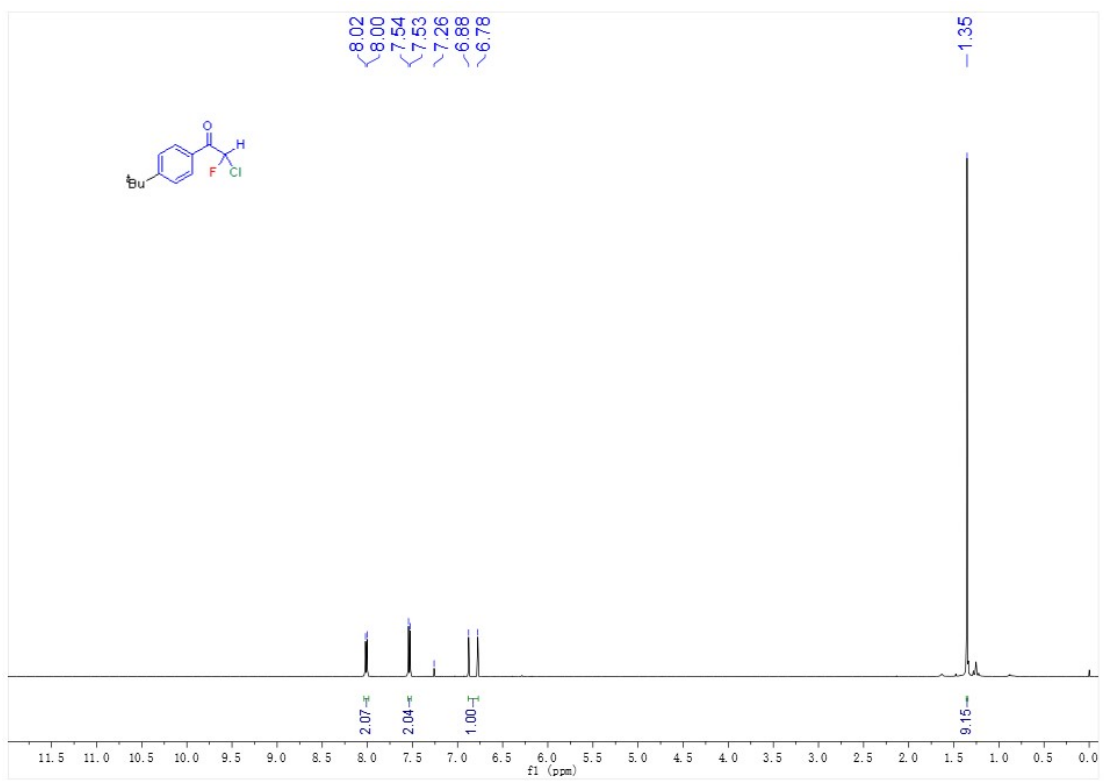

### <sup>13</sup>C NMR spectrum for 2f

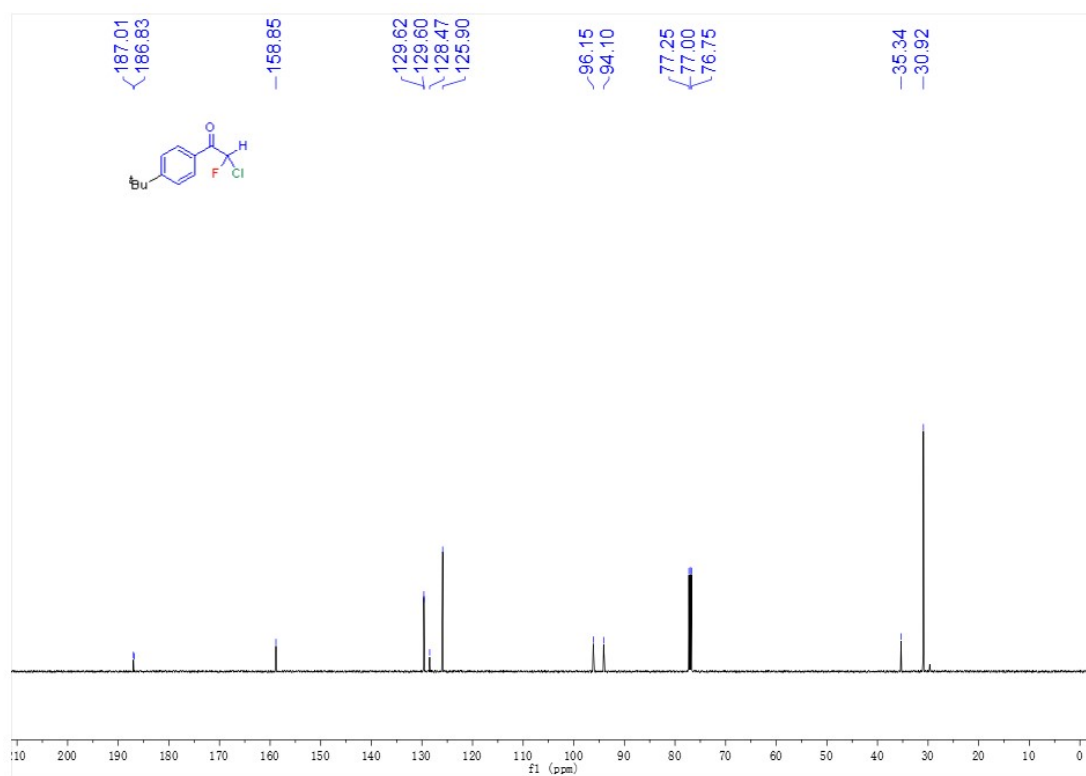

### <sup>19</sup>F NMR spectrum for 2f

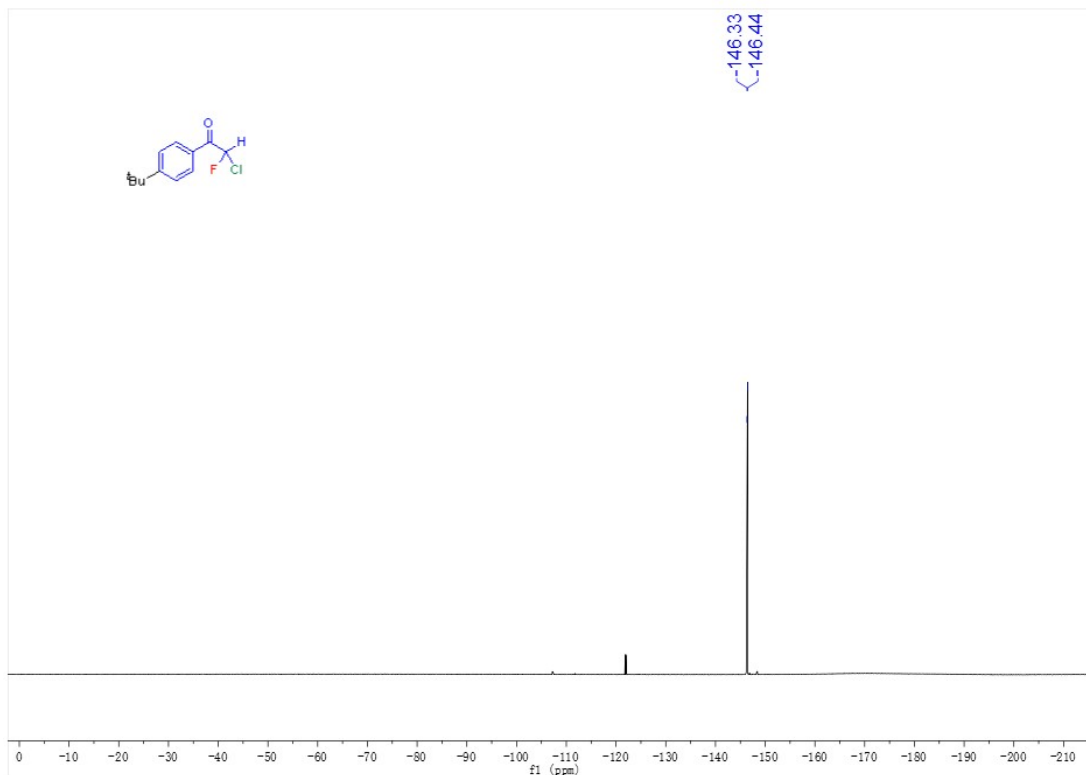

### <sup>1</sup>H NMR spectrum for 2g

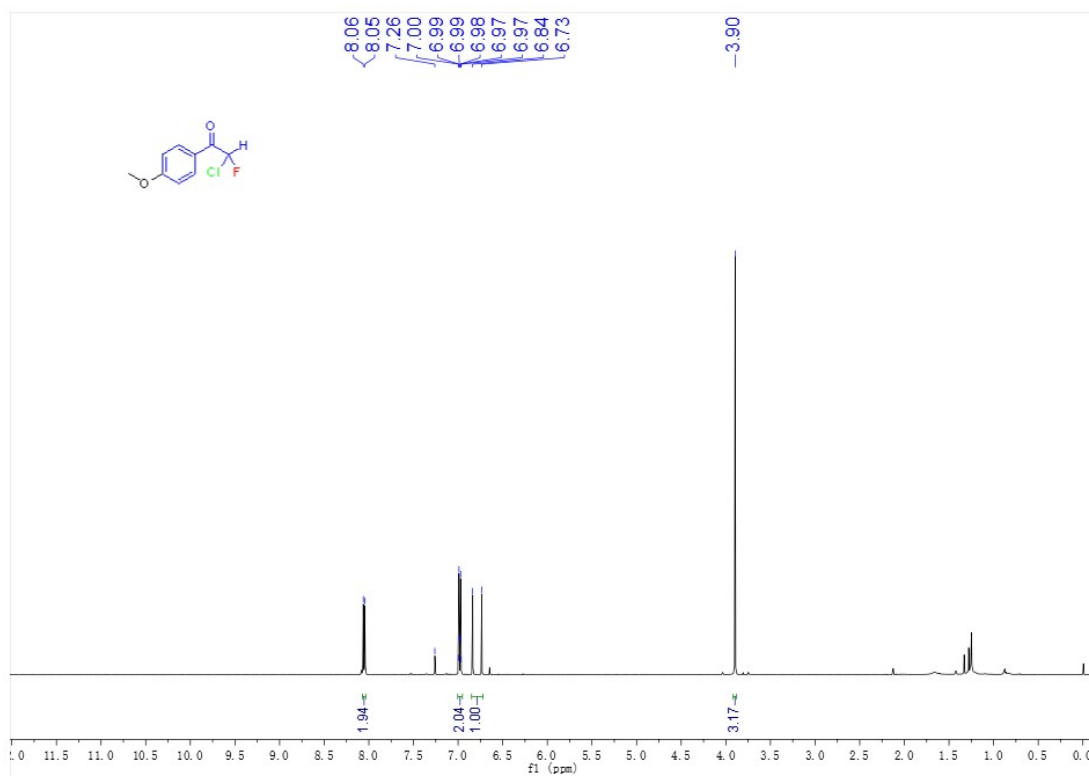

### <sup>13</sup>C NMR spectrum for 2g

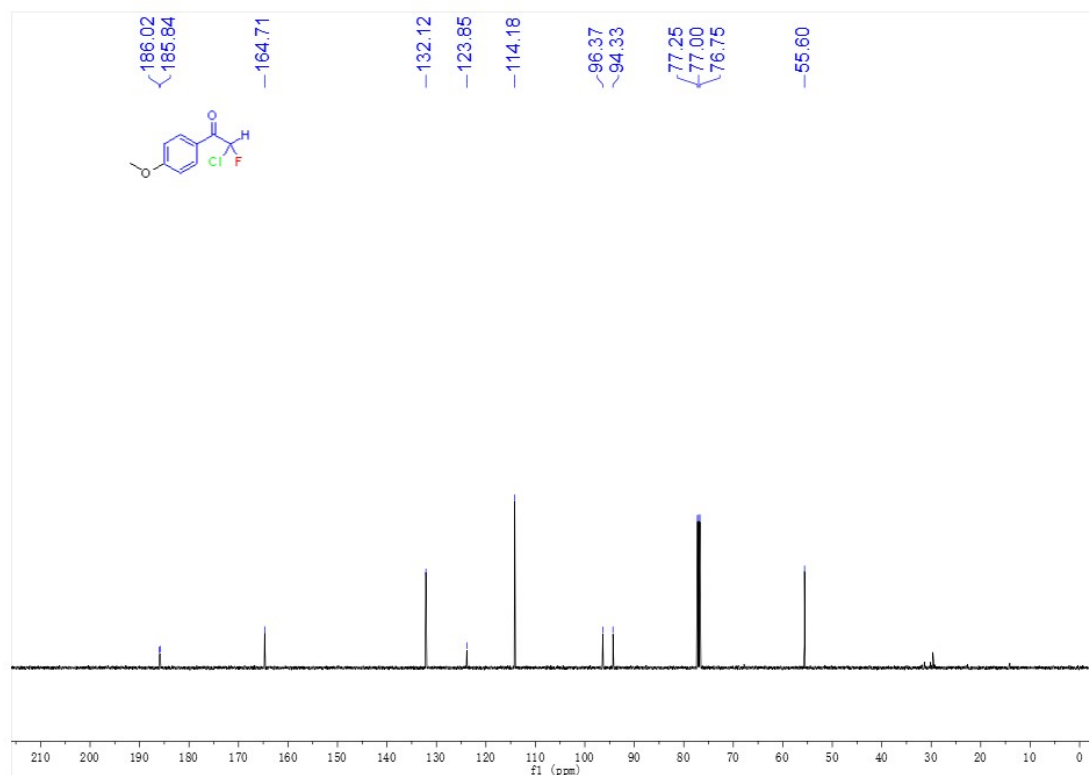



**<sup>19</sup>F NMR spectrum for 2g**

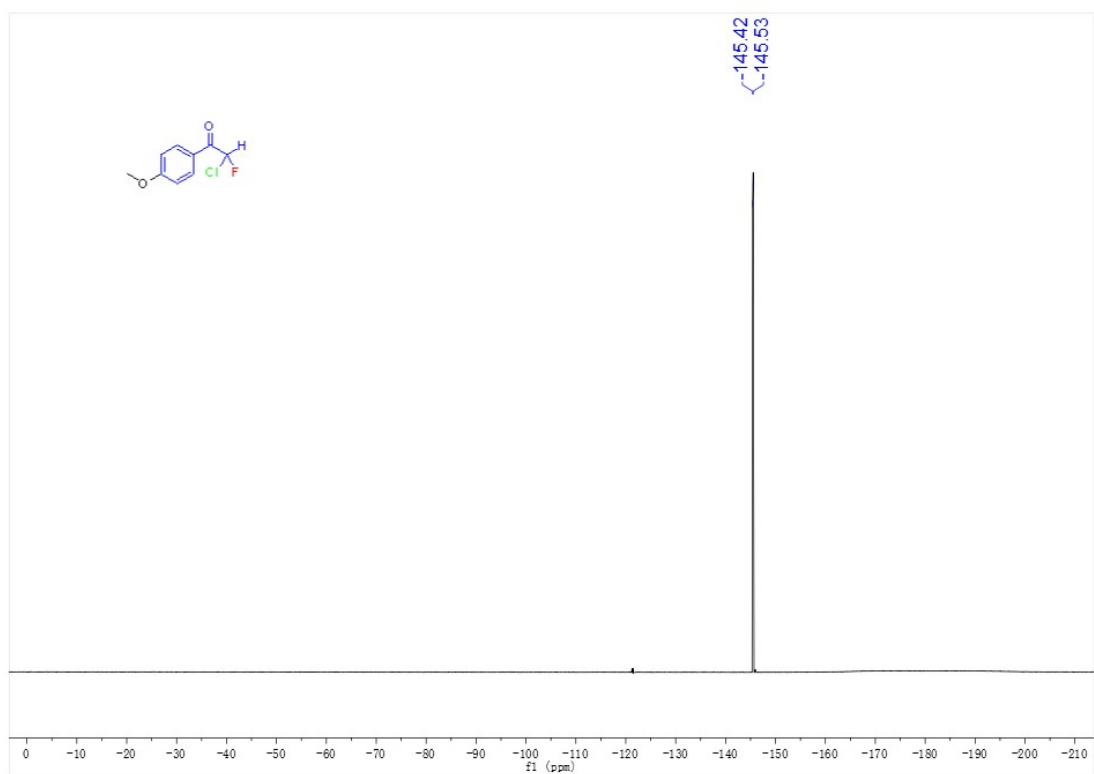

**<sup>1</sup>H NMR spectrum for 2h**

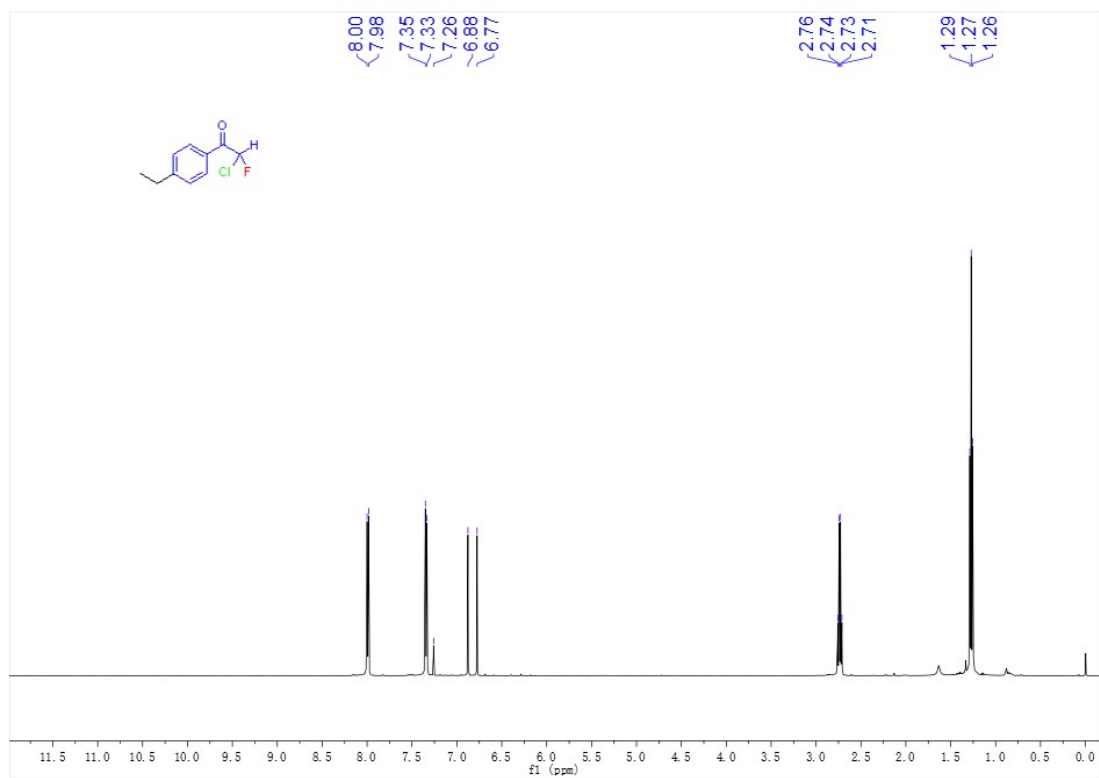

### <sup>13</sup>C NMR spectrum for 2h

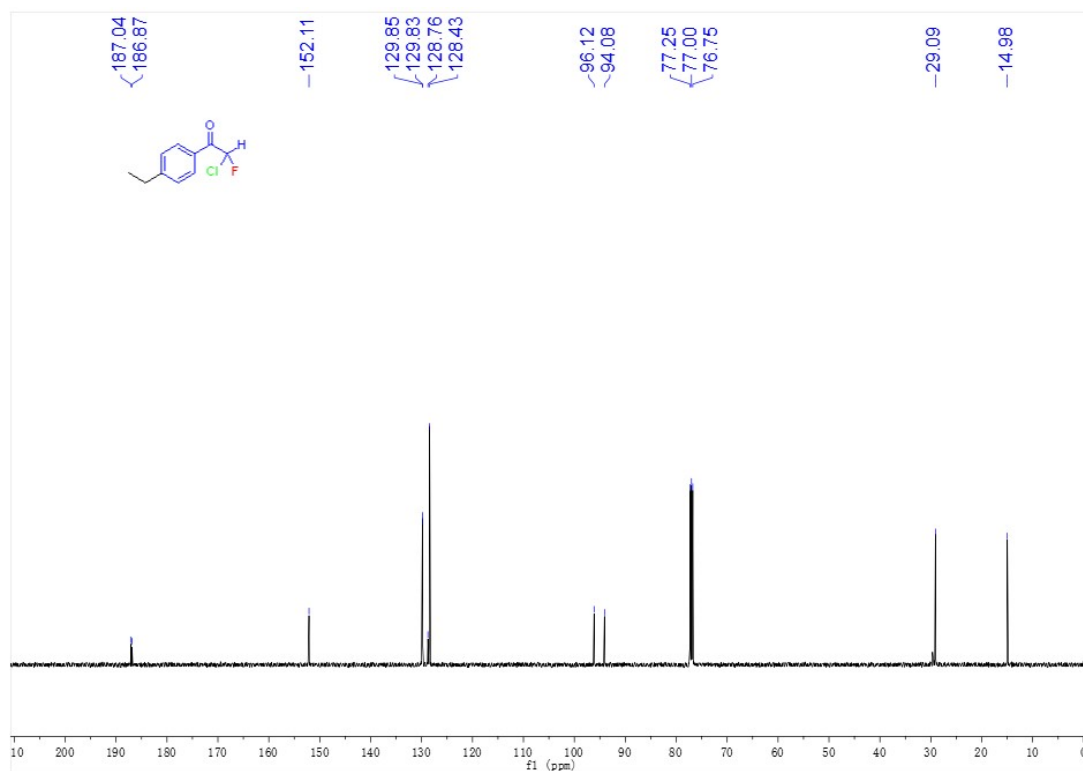

### <sup>19</sup>F NMR spectrum for 2h

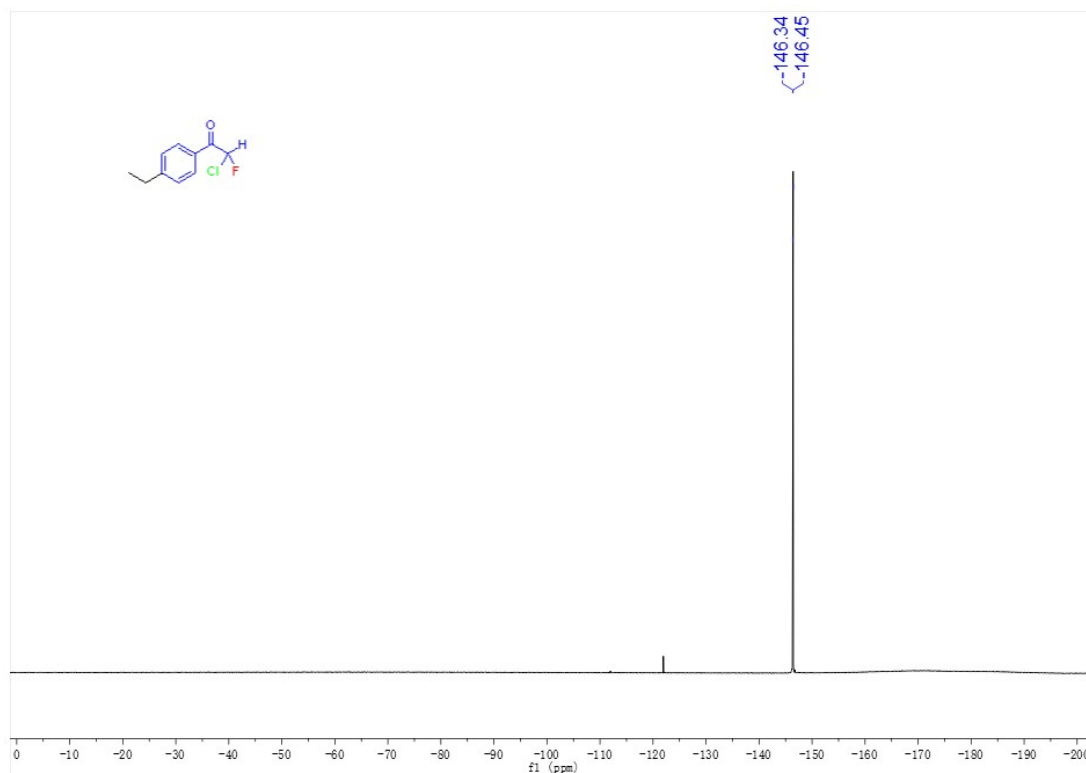

### <sup>1</sup>H NMR spectrum for 2i

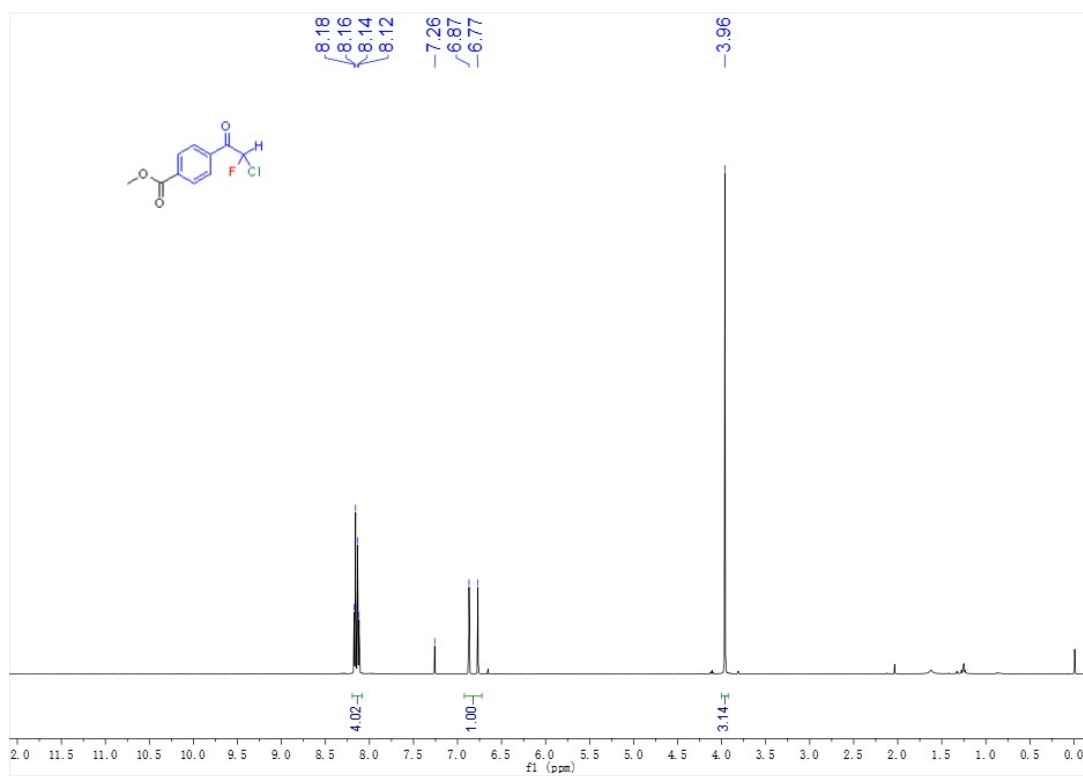

### <sup>13</sup>C NMR spectrum for 2i

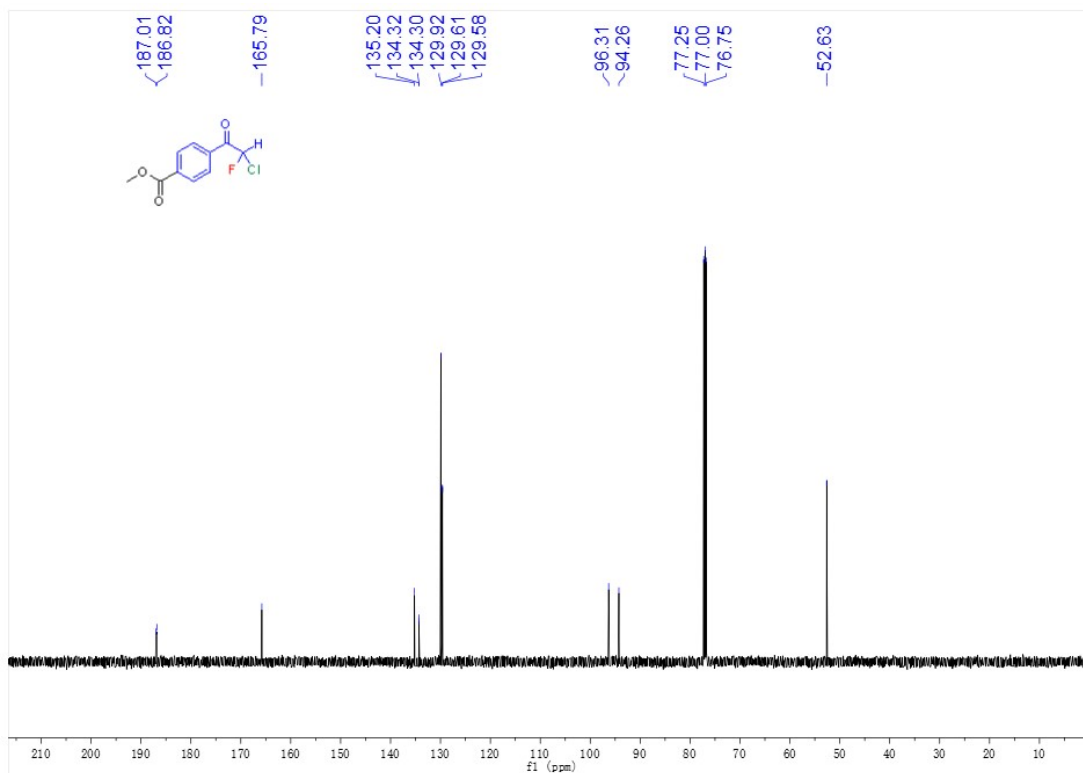

**<sup>19</sup>F NMR spectrum for 2i**

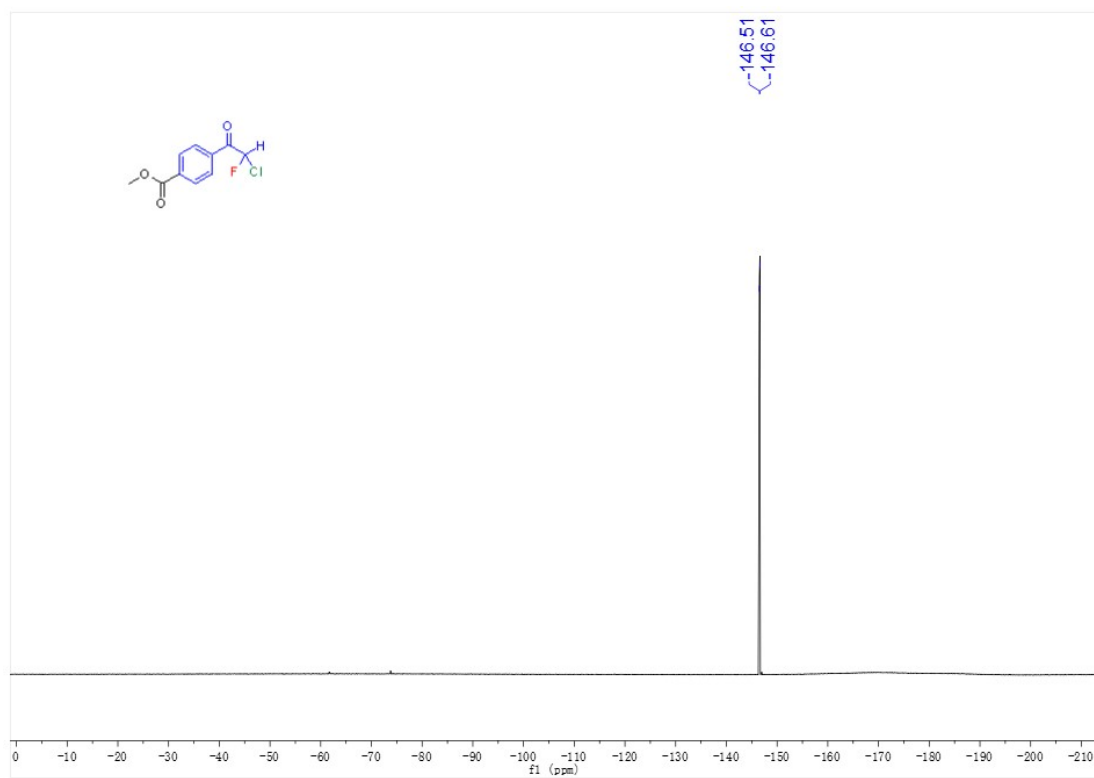

**<sup>1</sup>H NMR spectrum for 2j**

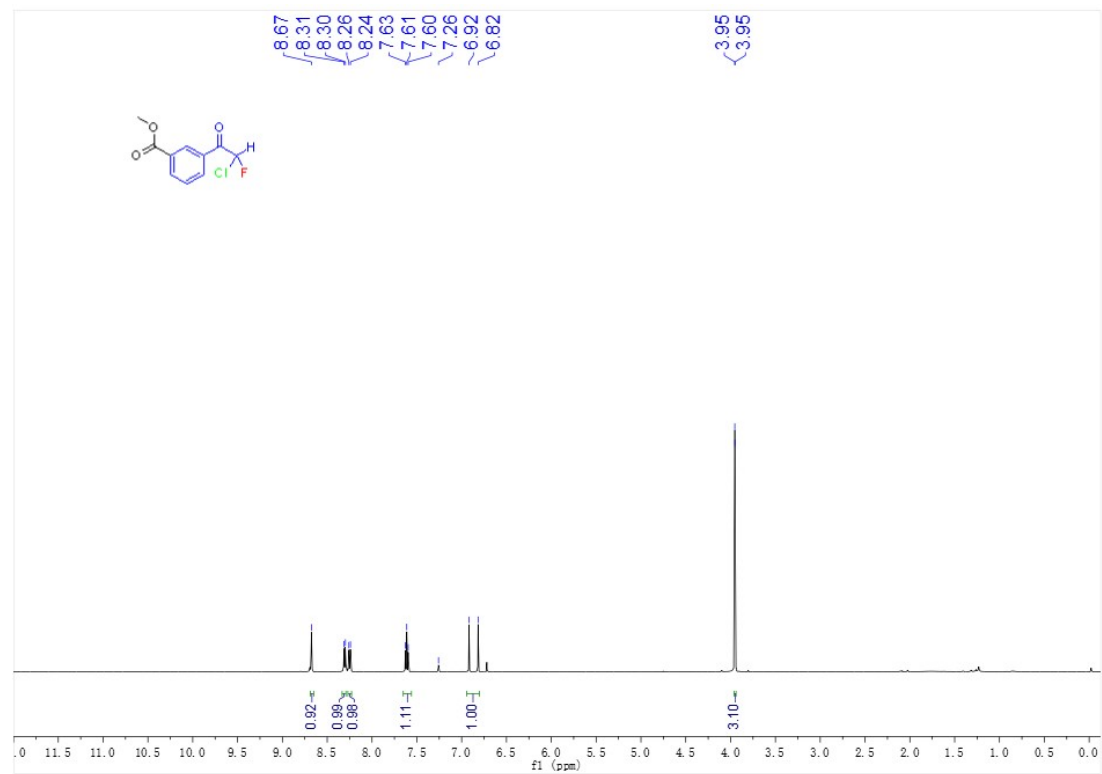

### <sup>13</sup>C NMR spectrum for 2j

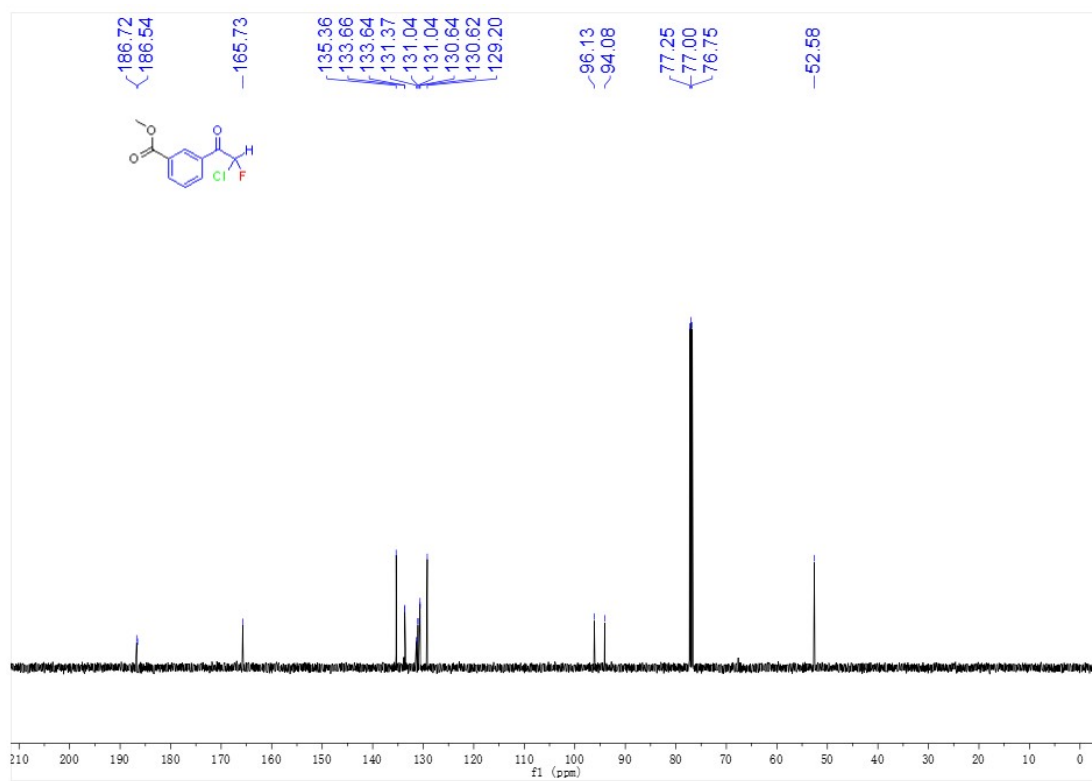

### <sup>19</sup>F NMR spectrum for 2j

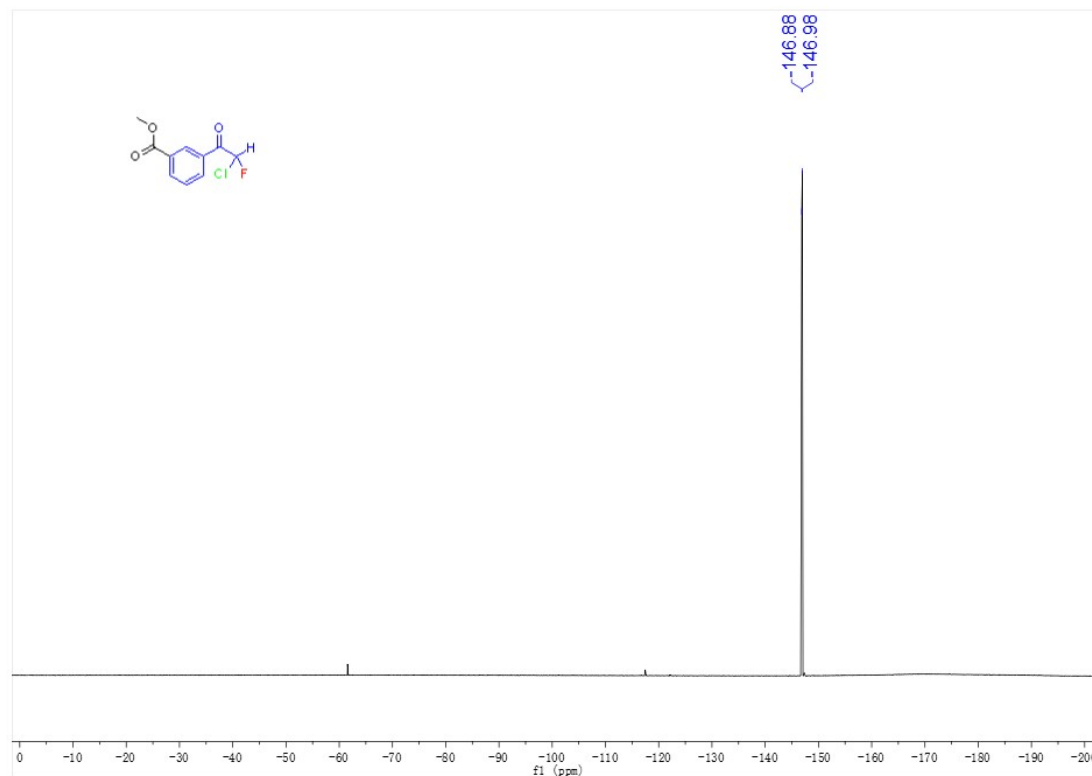

### <sup>1</sup>H NMR spectrum for 2k

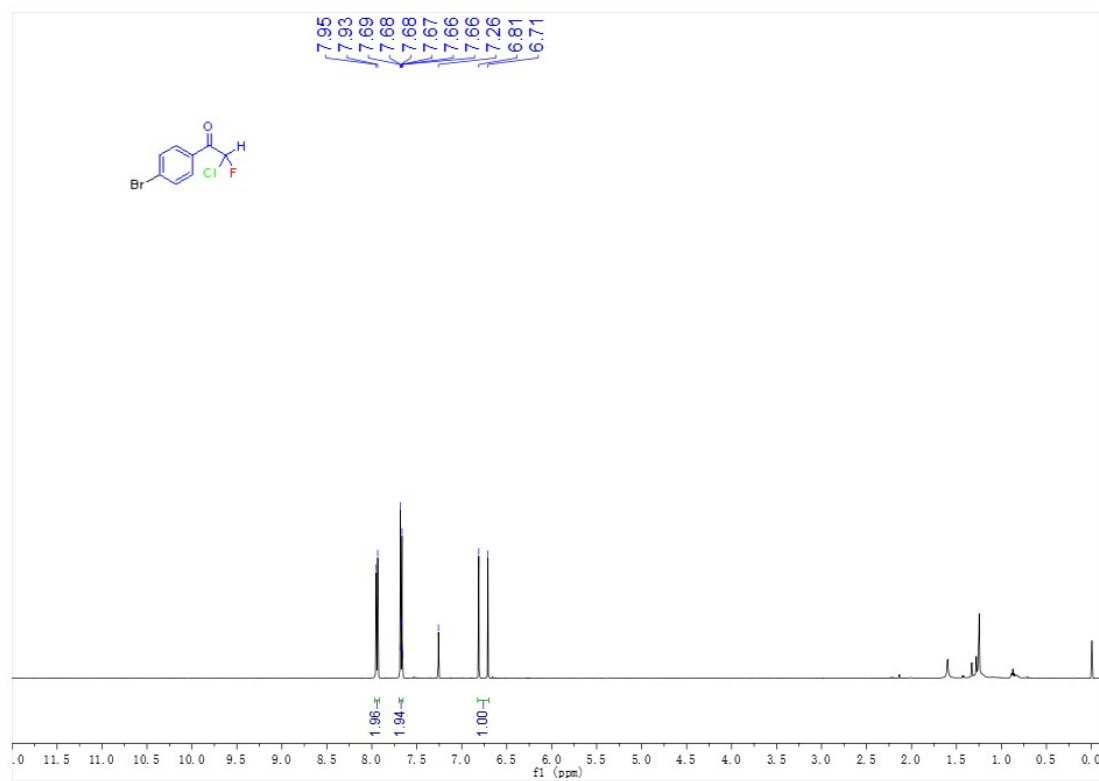

### <sup>13</sup>C NMR spectrum for 2k

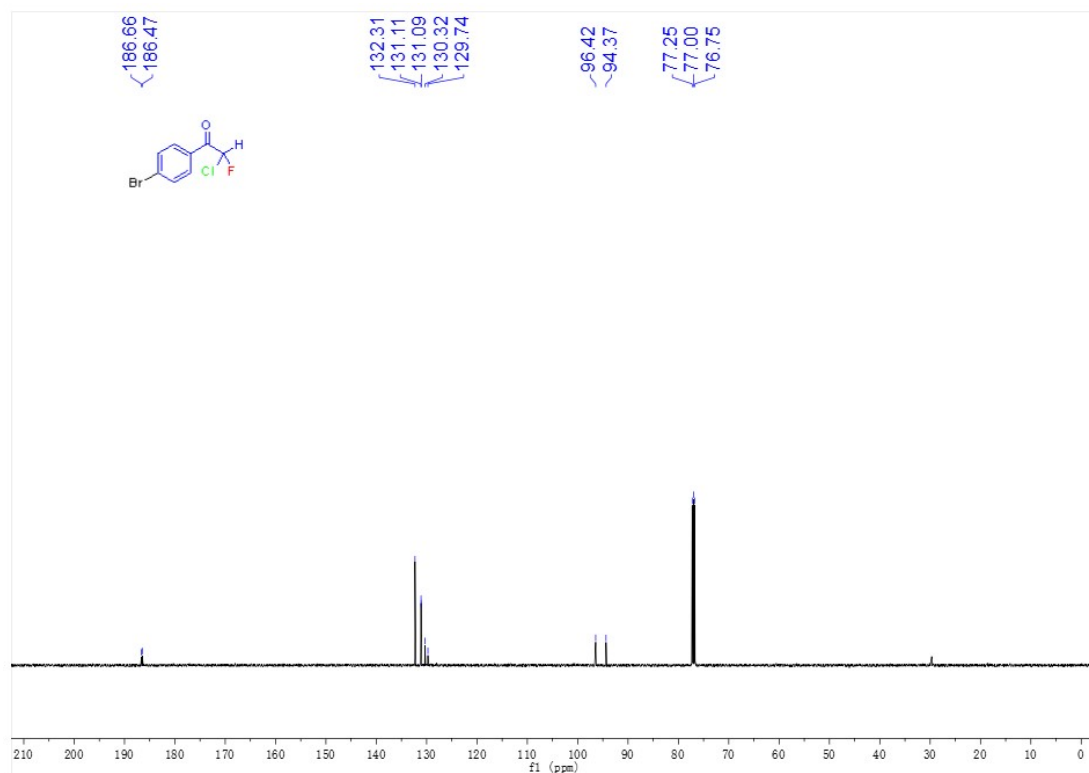

### <sup>19</sup>F NMR spectrum for 2k

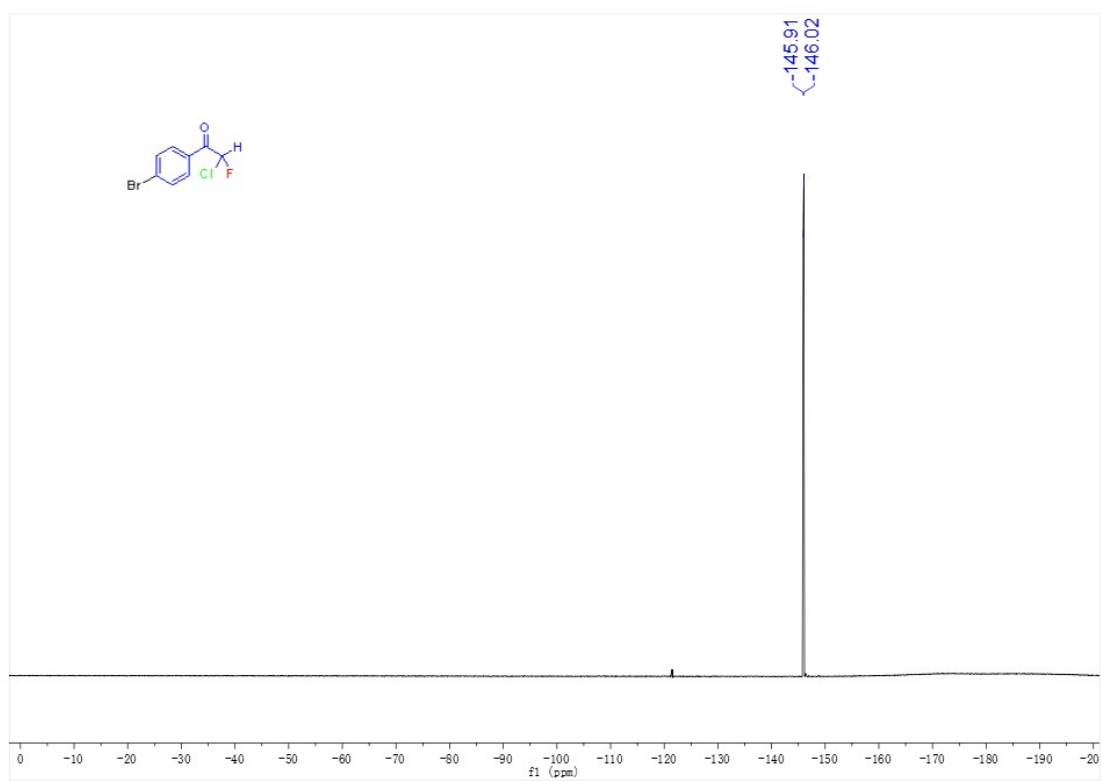

### <sup>1</sup>H NMR spectrum for 2l

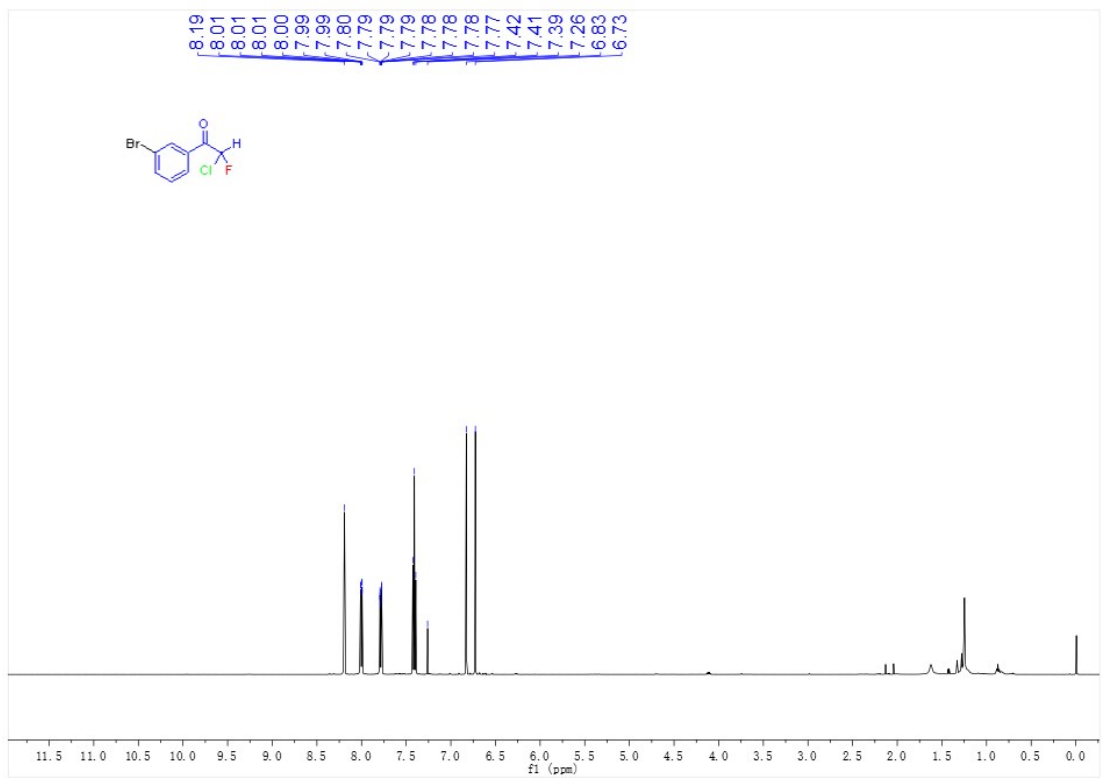

### <sup>13</sup>C NMR spectrum for 2l

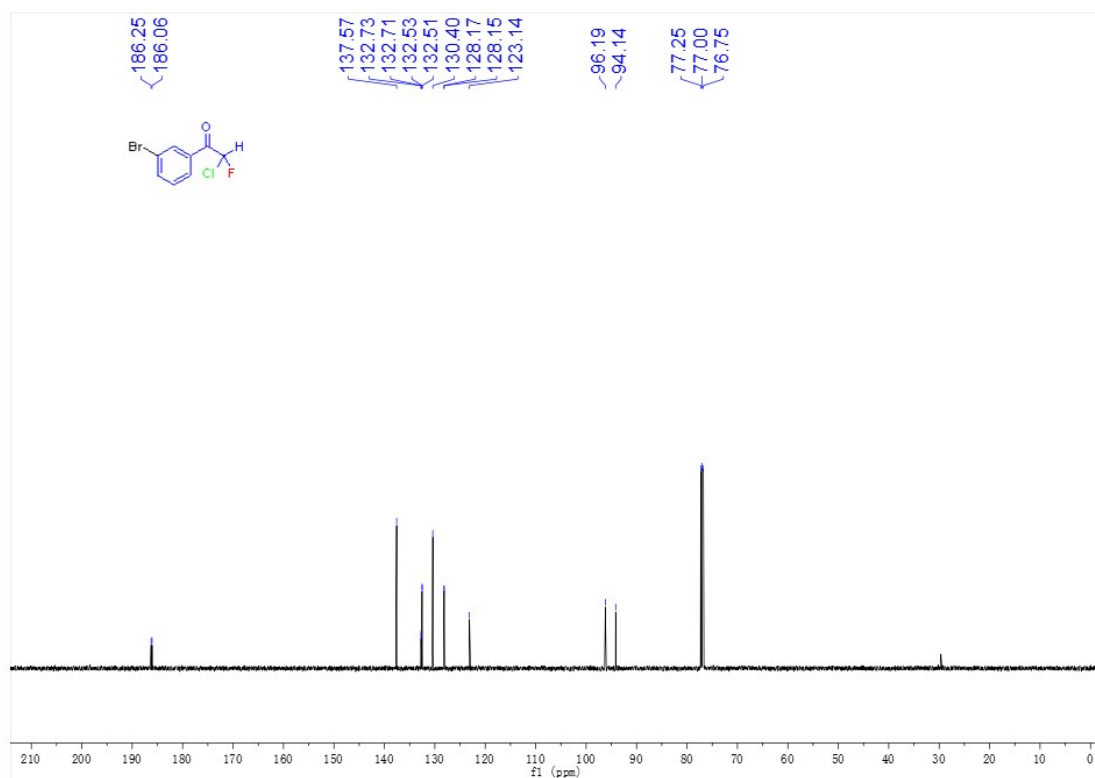

### <sup>19</sup>F NMR spectrum for 2l

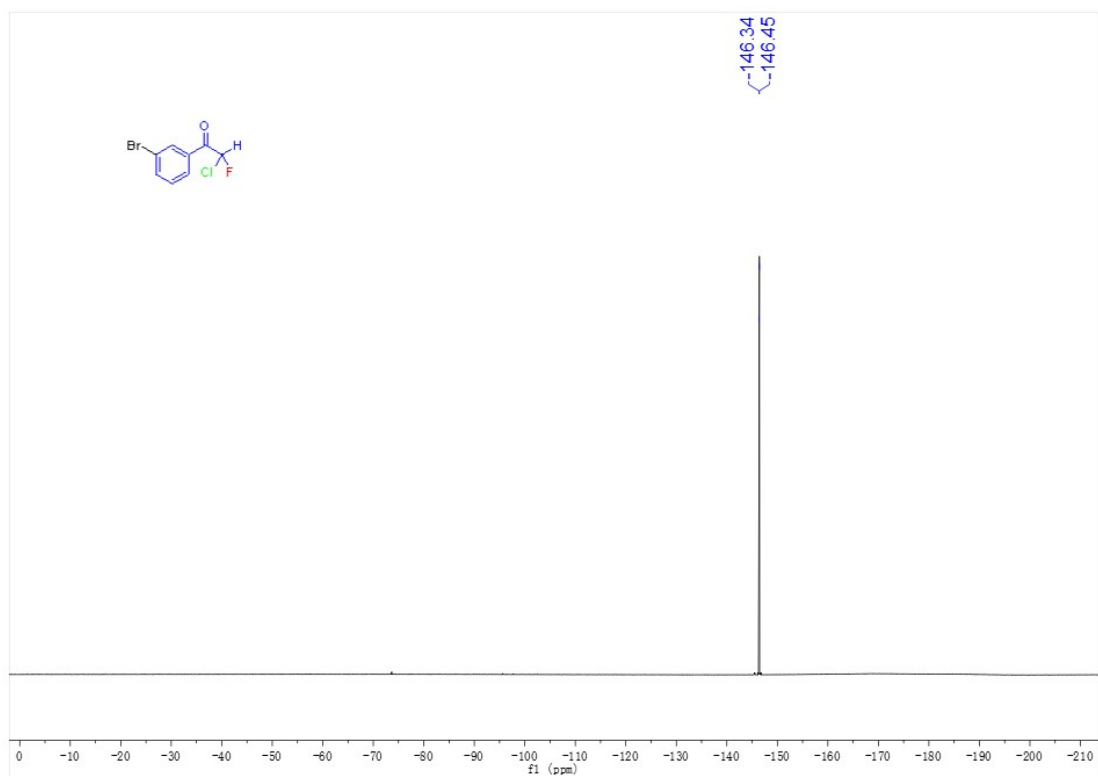



### <sup>1</sup>H NMR spectrum for 2m

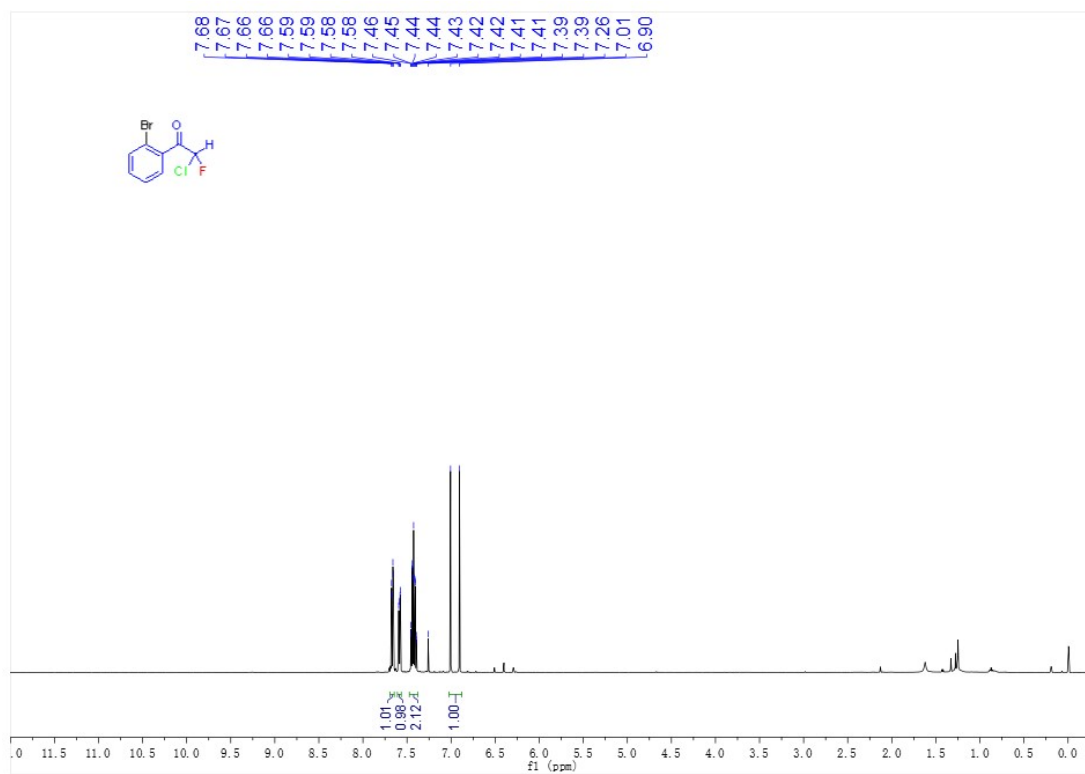

### <sup>13</sup>C NMR spectrum for 2m

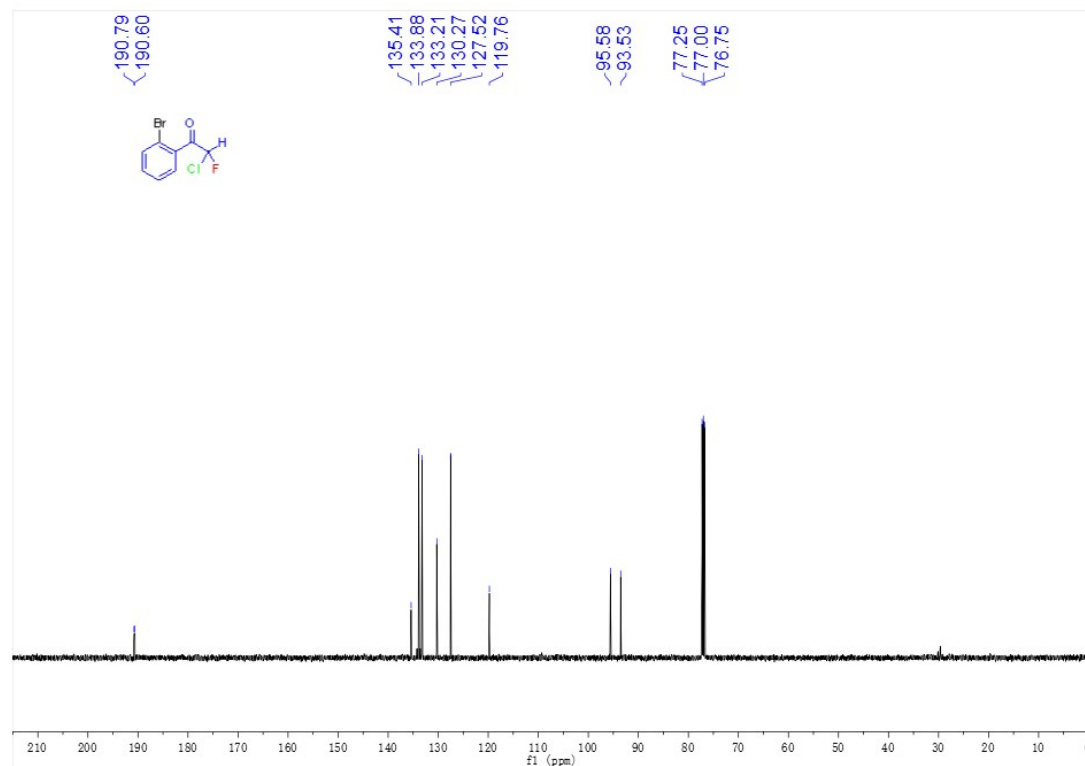

**<sup>19</sup>F NMR spectrum for 2m**

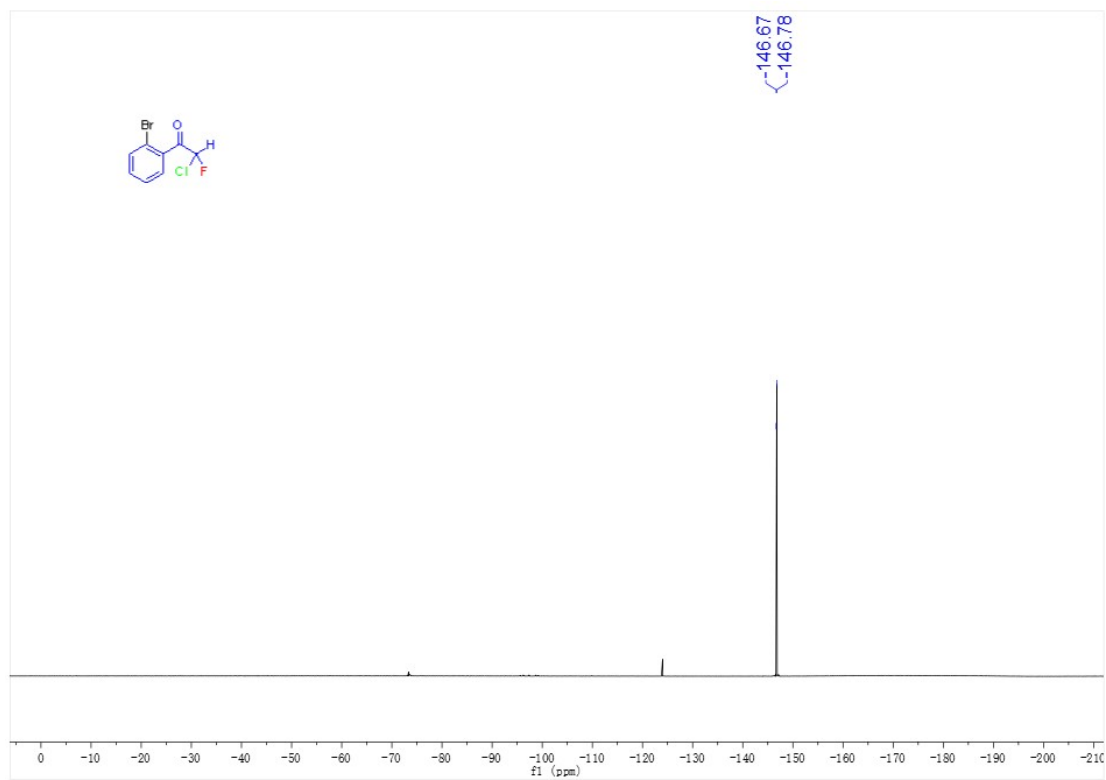

**<sup>1</sup>H NMR spectrum for 2n**

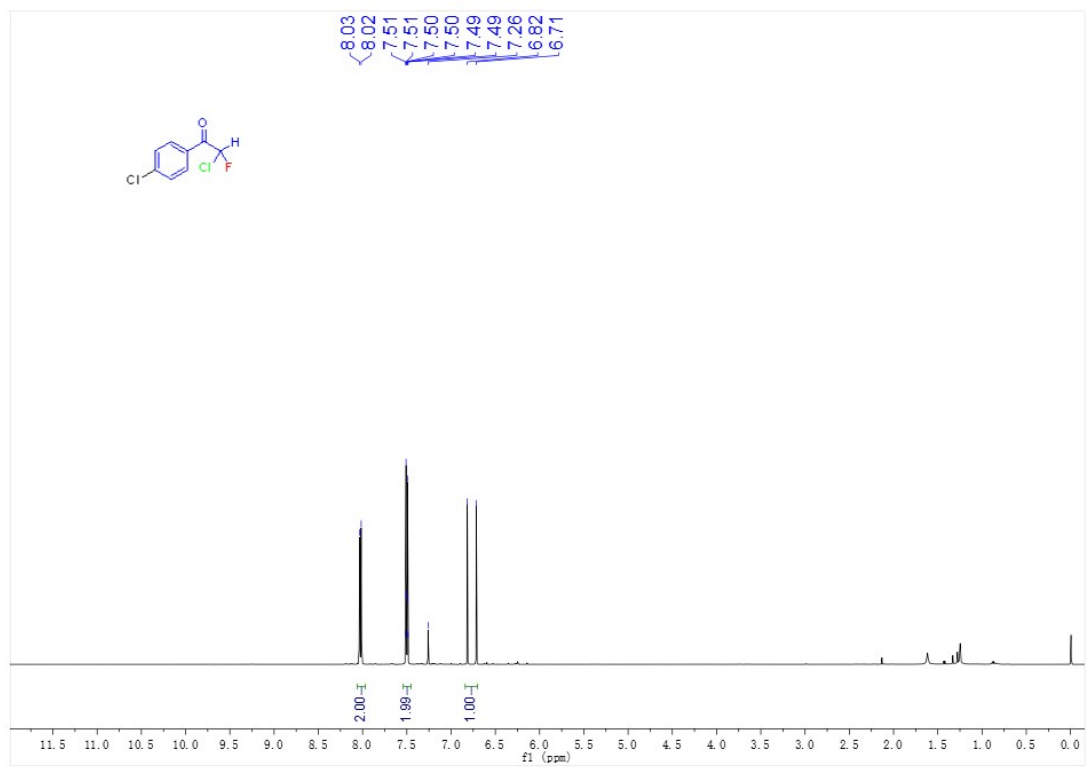

### <sup>13</sup>C NMR spectrum for 2n

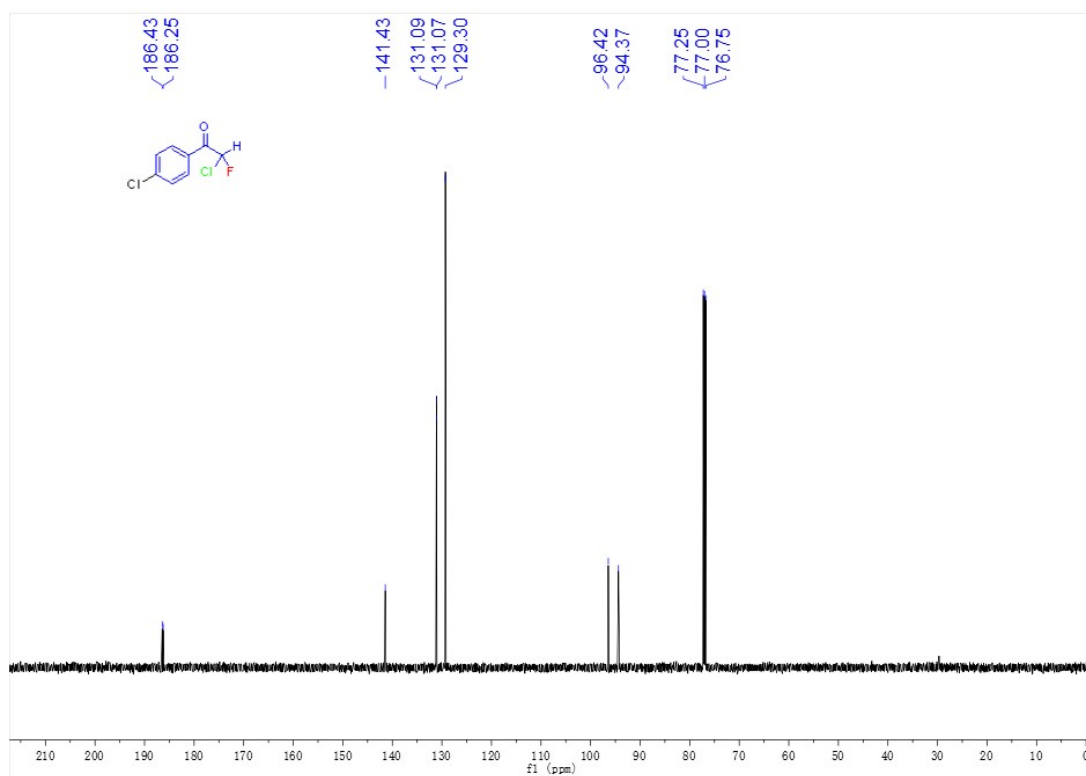

### <sup>19</sup>F NMR spectrum for 2n

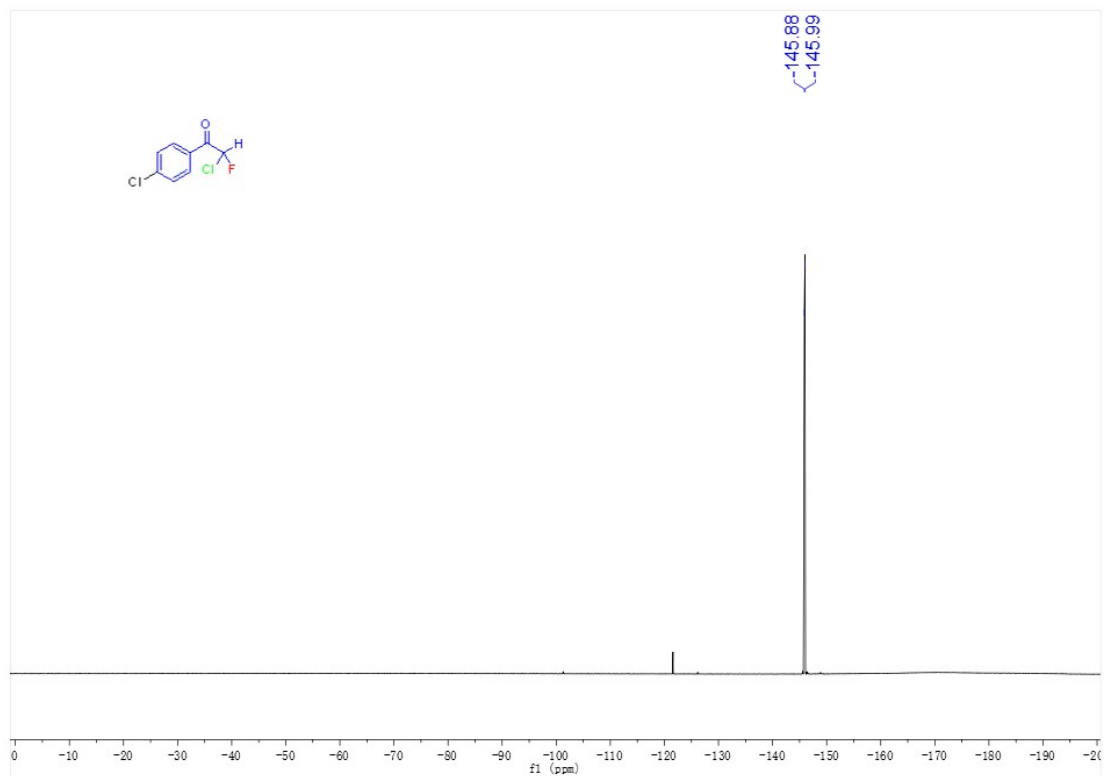

### <sup>1</sup>H NMR spectrum for 2o

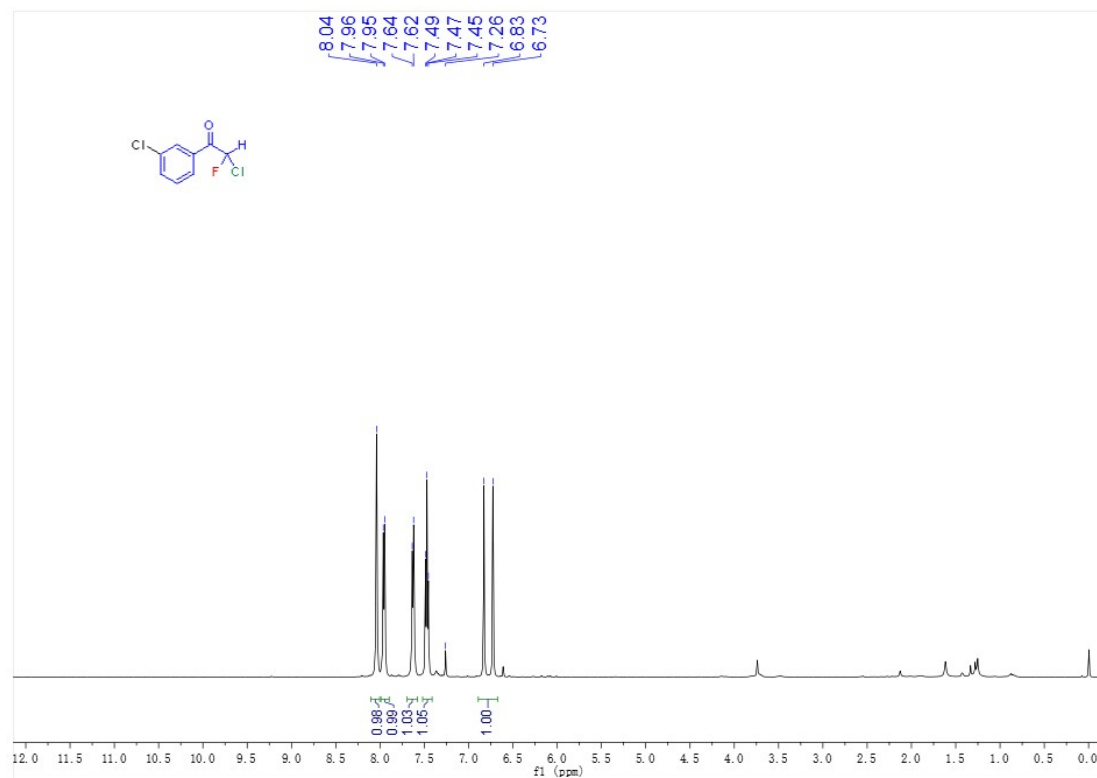

### <sup>13</sup>C NMR spectrum for 2o

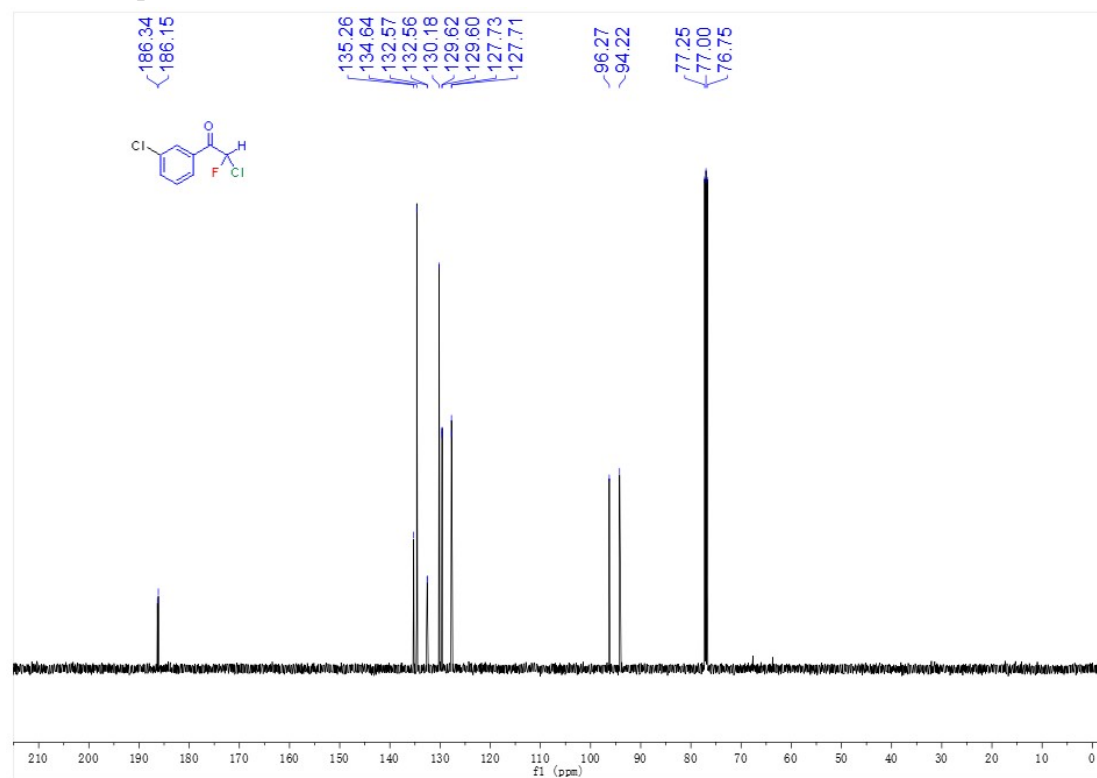

**<sup>19</sup>F NMR spectrum for 2o**

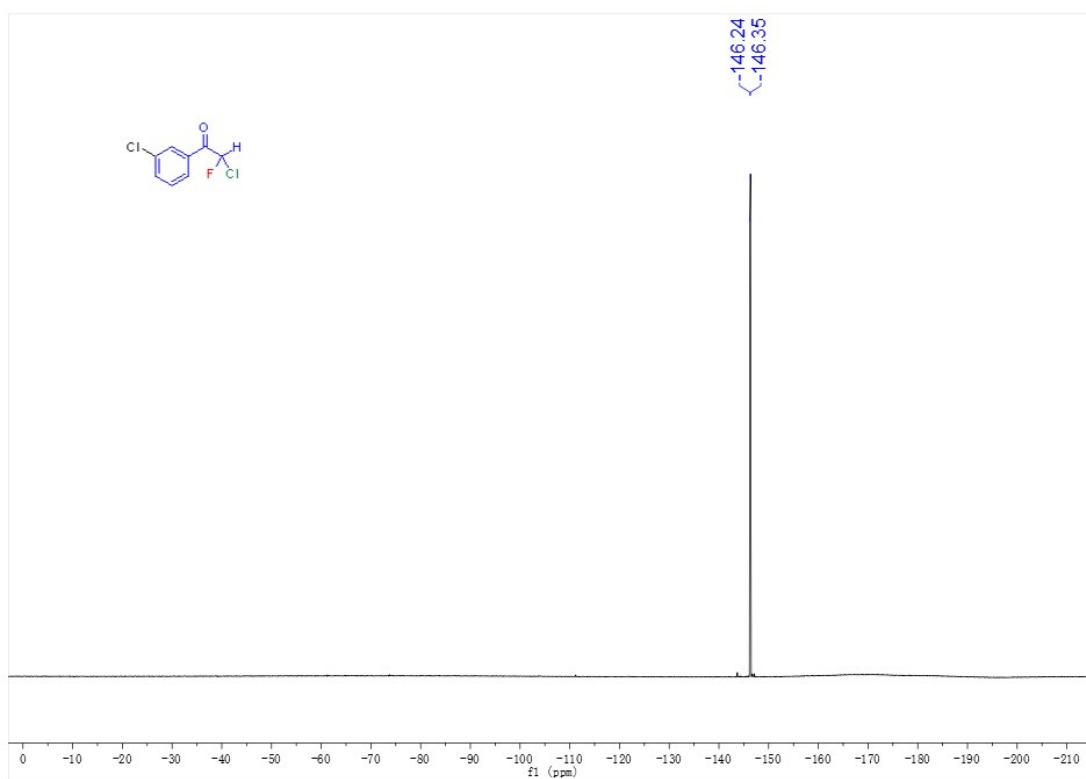

**<sup>1</sup>H NMR spectrum for 2p**

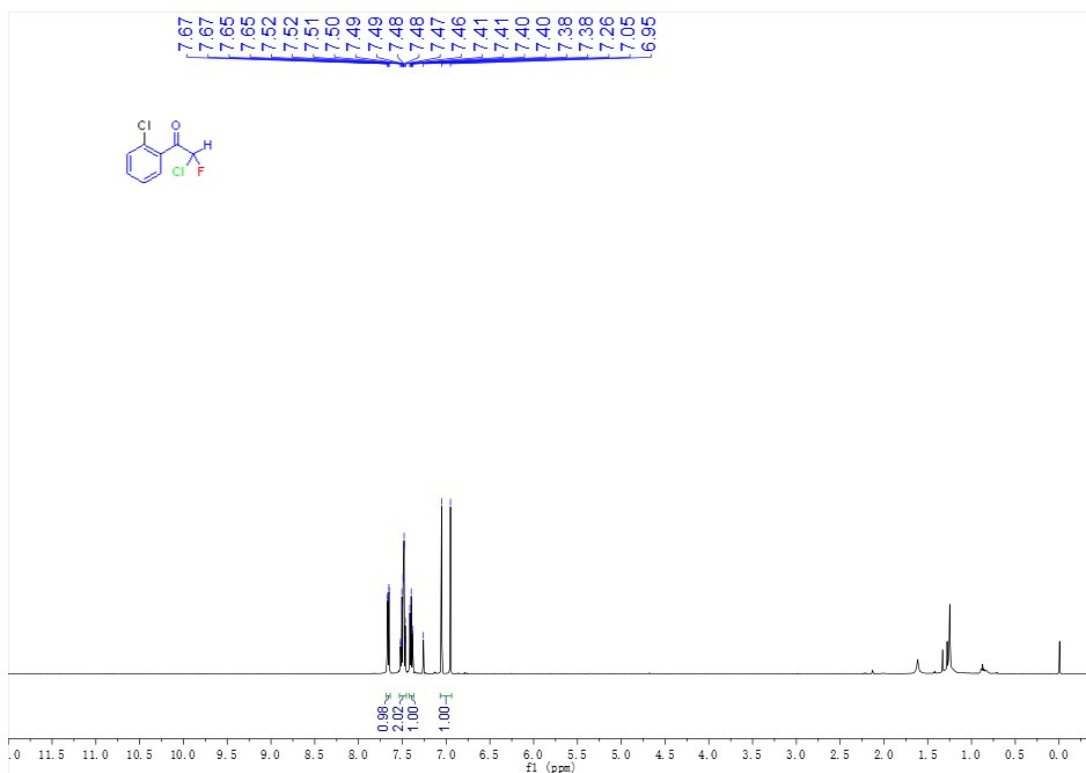

**<sup>13</sup>C NMR spectrum for 2p**

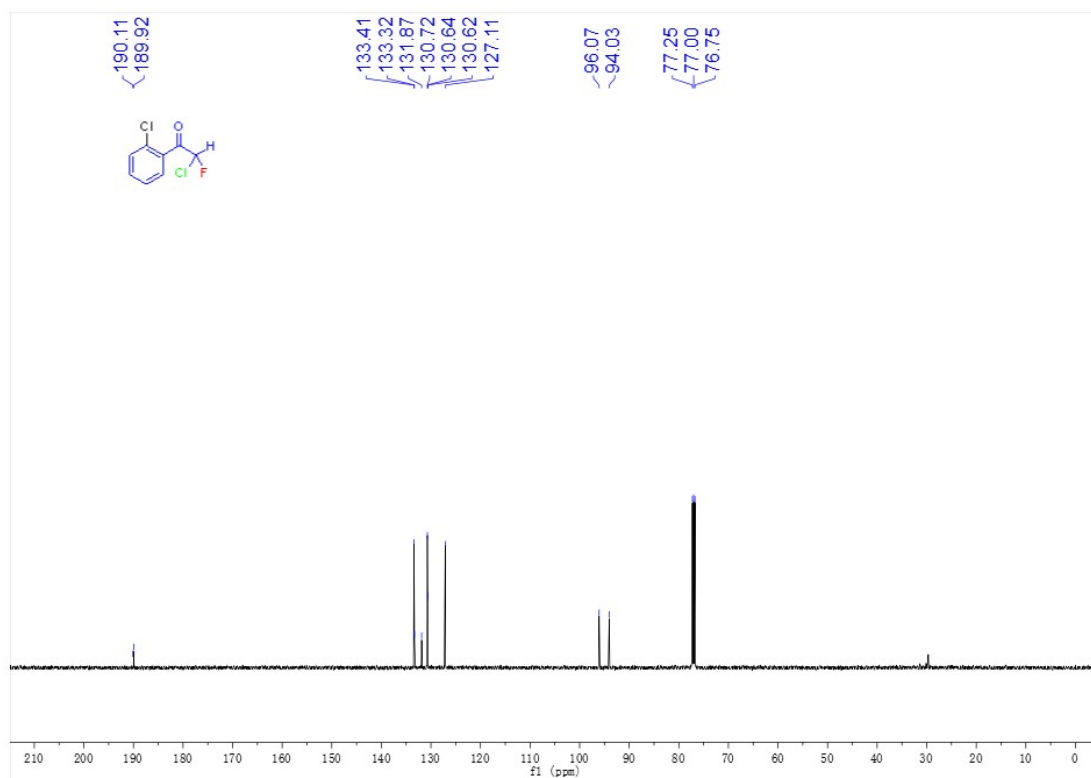

**<sup>19</sup>F NMR spectrum for 2p**

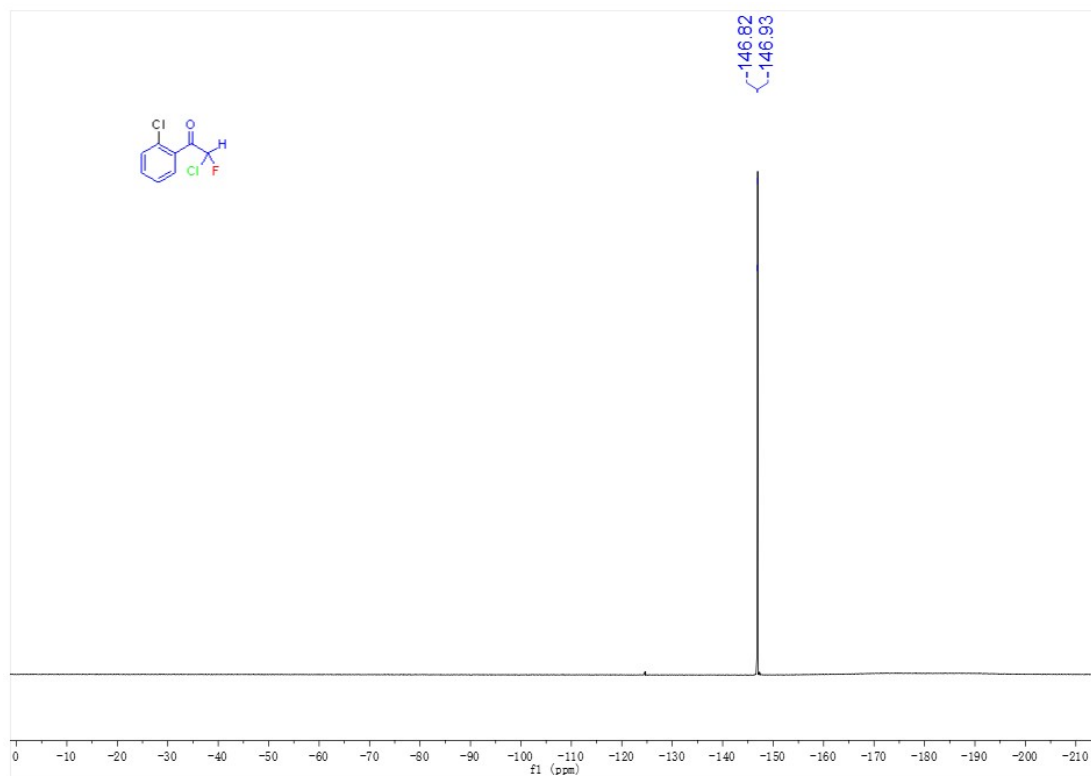

### <sup>1</sup>H NMR spectrum for 2q

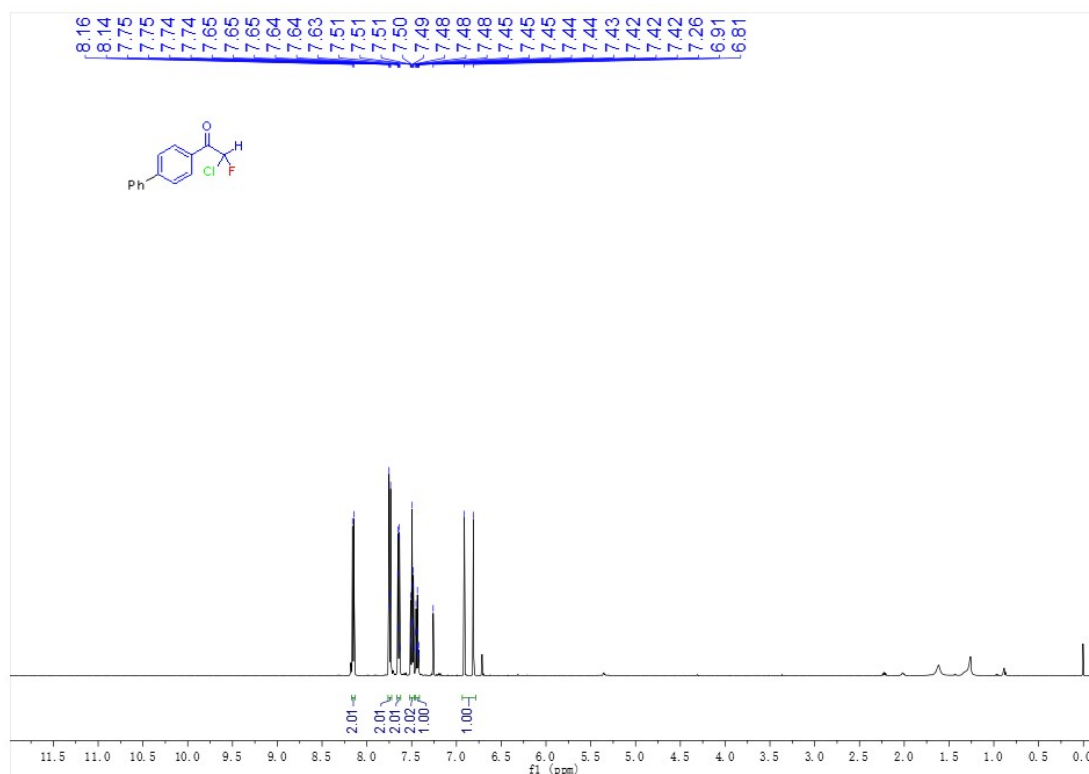

### <sup>13</sup>C NMR spectrum for 2q

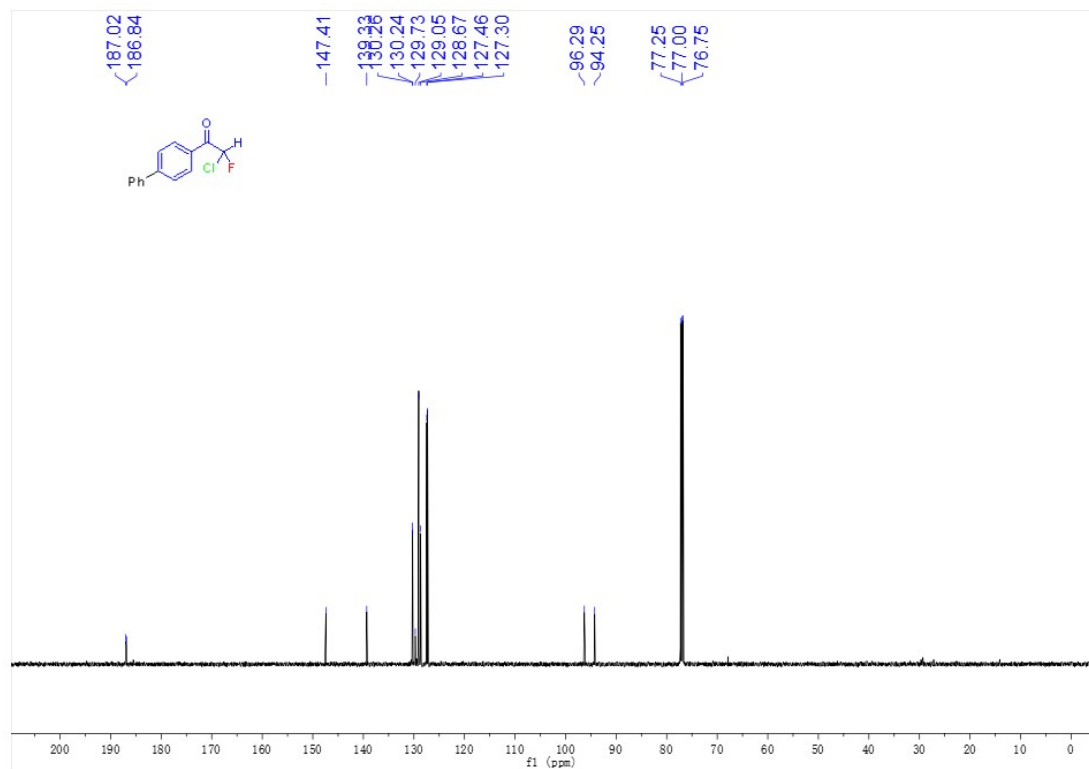

### <sup>19</sup>F NMR spectrum for 2q

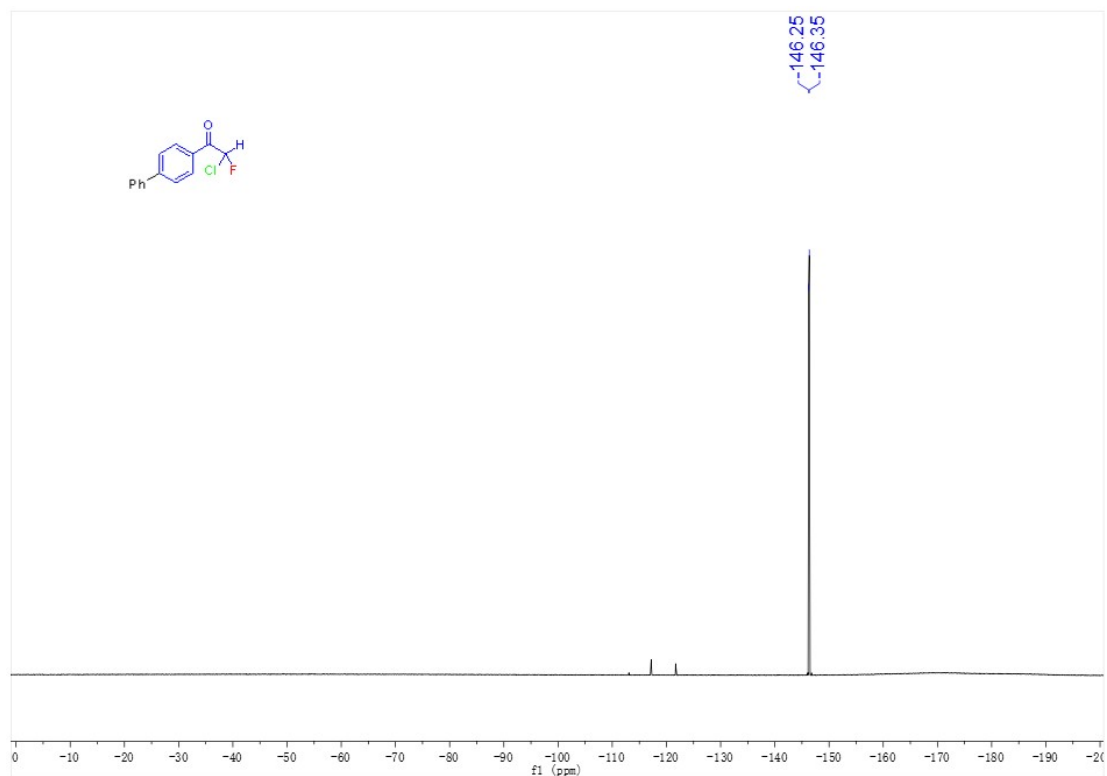

### <sup>1</sup>H NMR spectrum for 2r

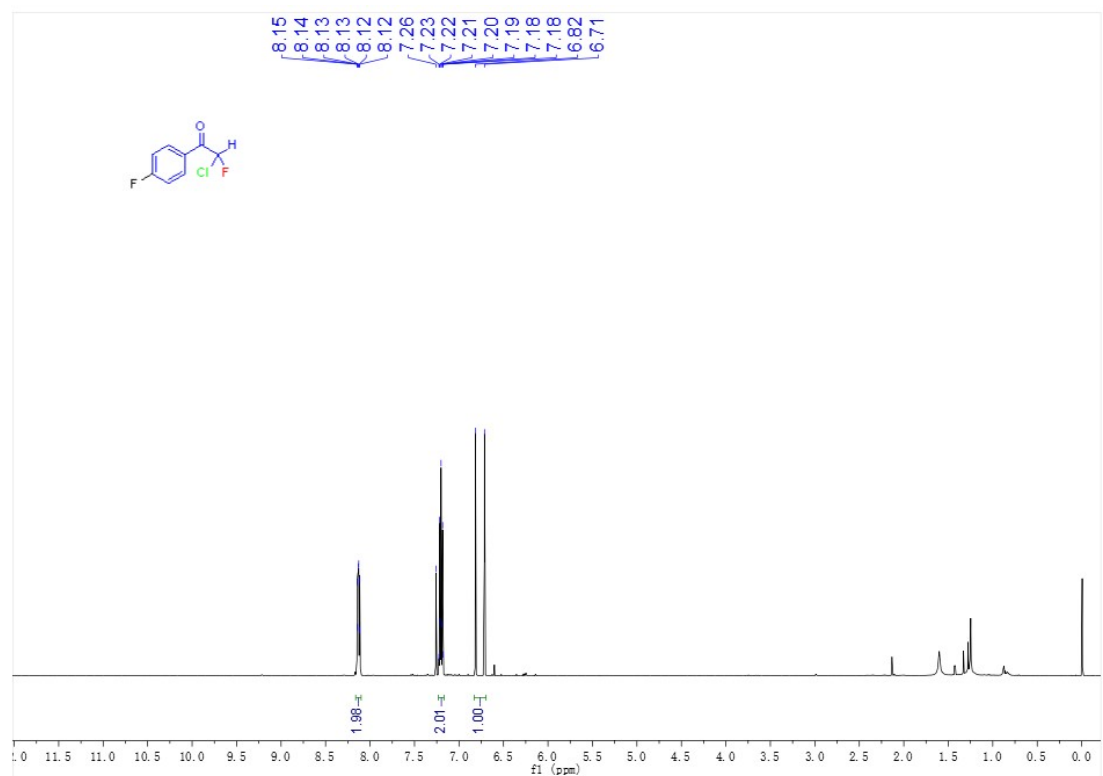



### <sup>13</sup>C NMR spectrum for 2r

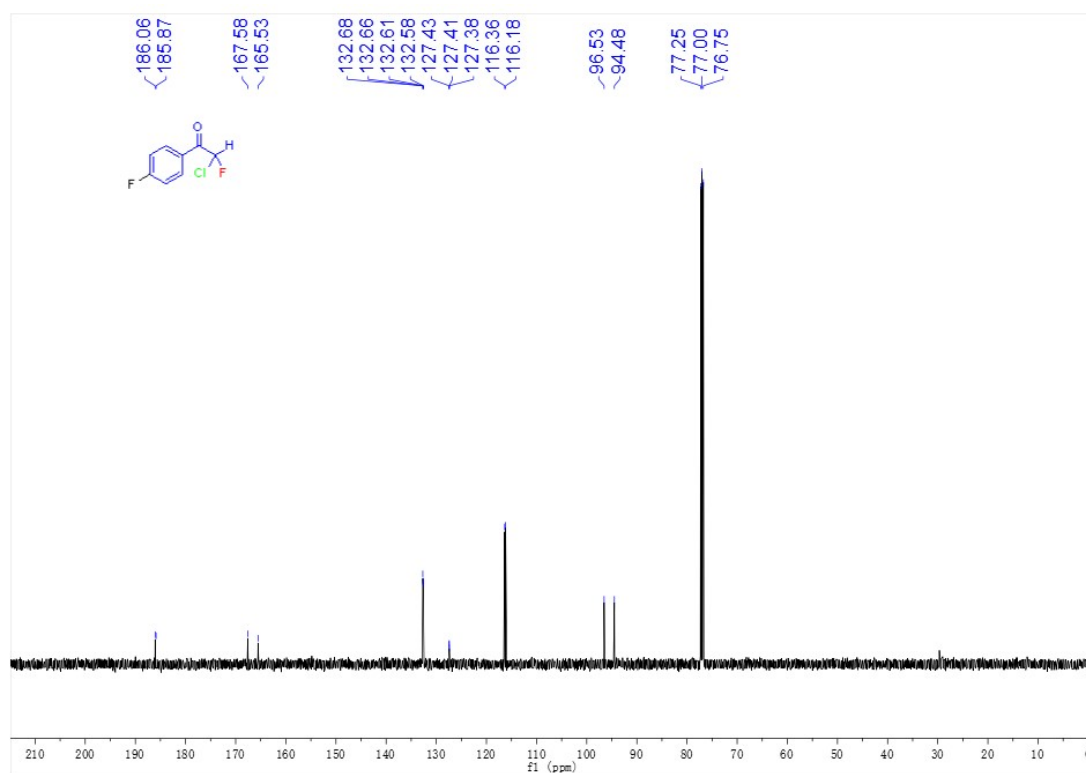

### <sup>19</sup>F NMR spectrum for 2r

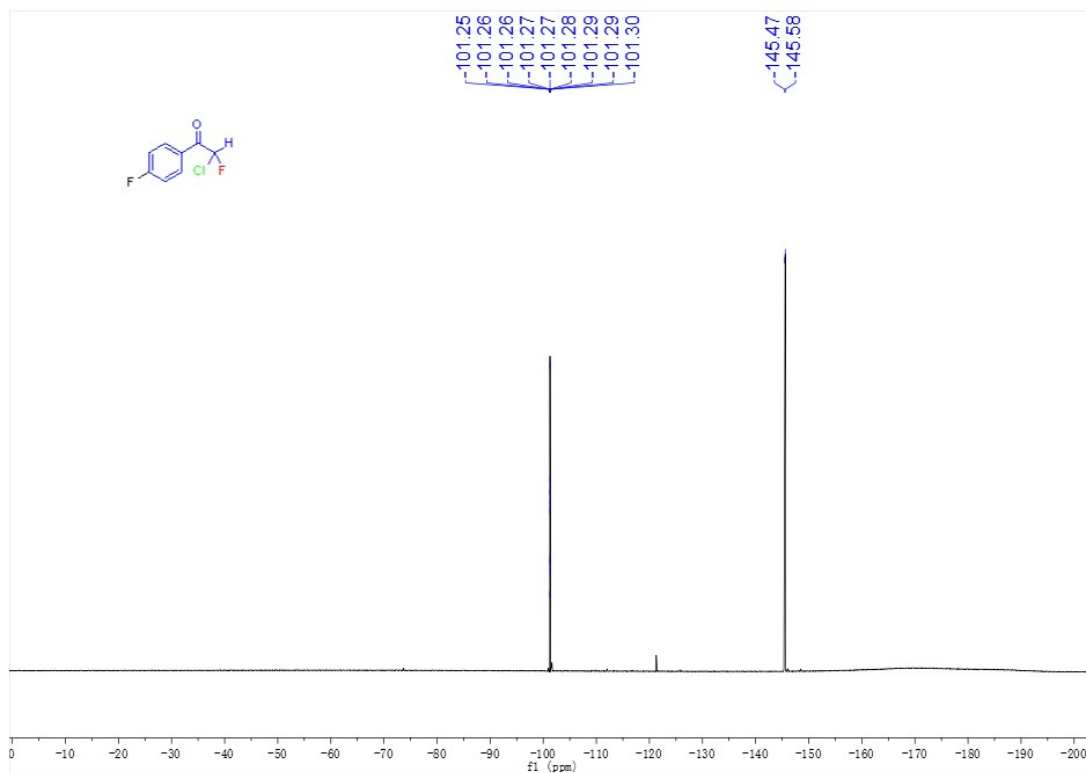

### <sup>1</sup>H NMR spectrum for 2s

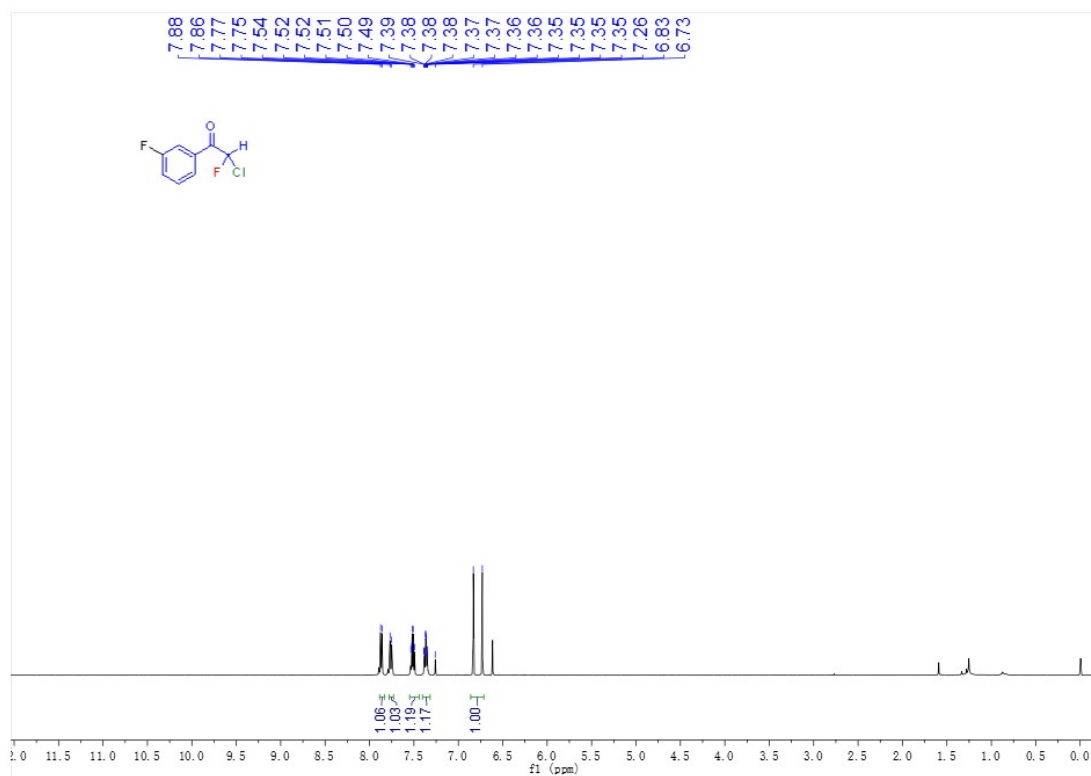

### <sup>13</sup>C NMR spectrum for 2s

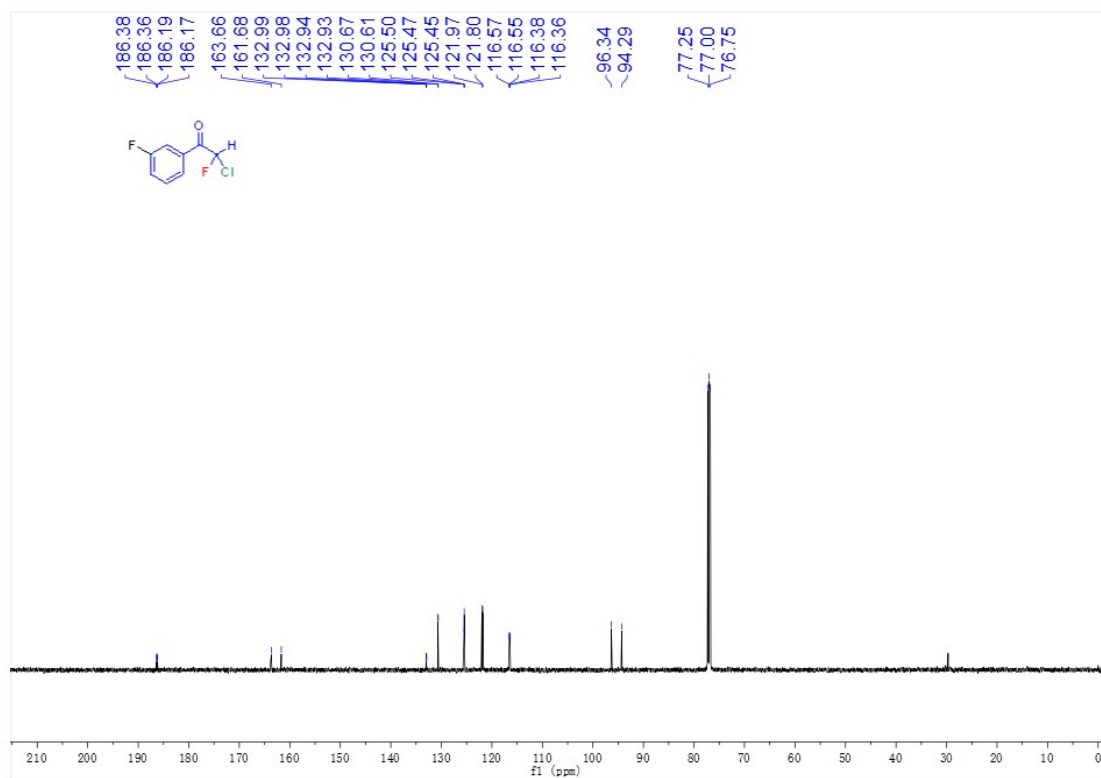

**<sup>19</sup>F NMR spectrum for 2s**

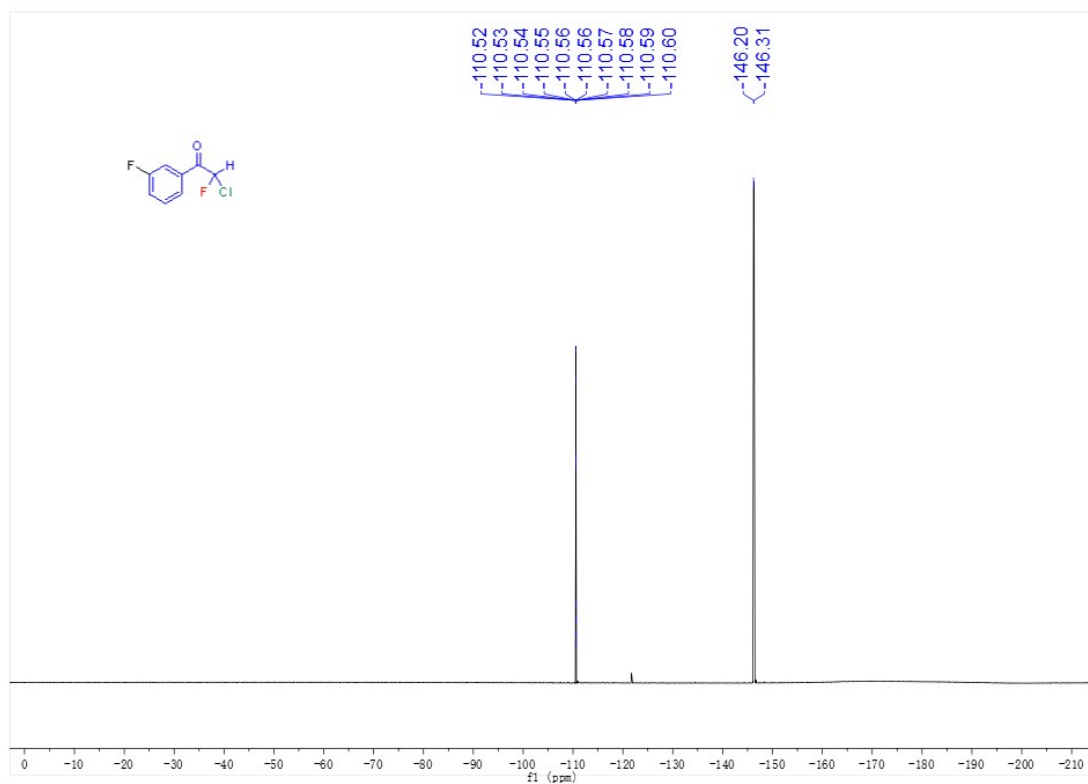

**<sup>1</sup>H NMR spectrum for 2t**

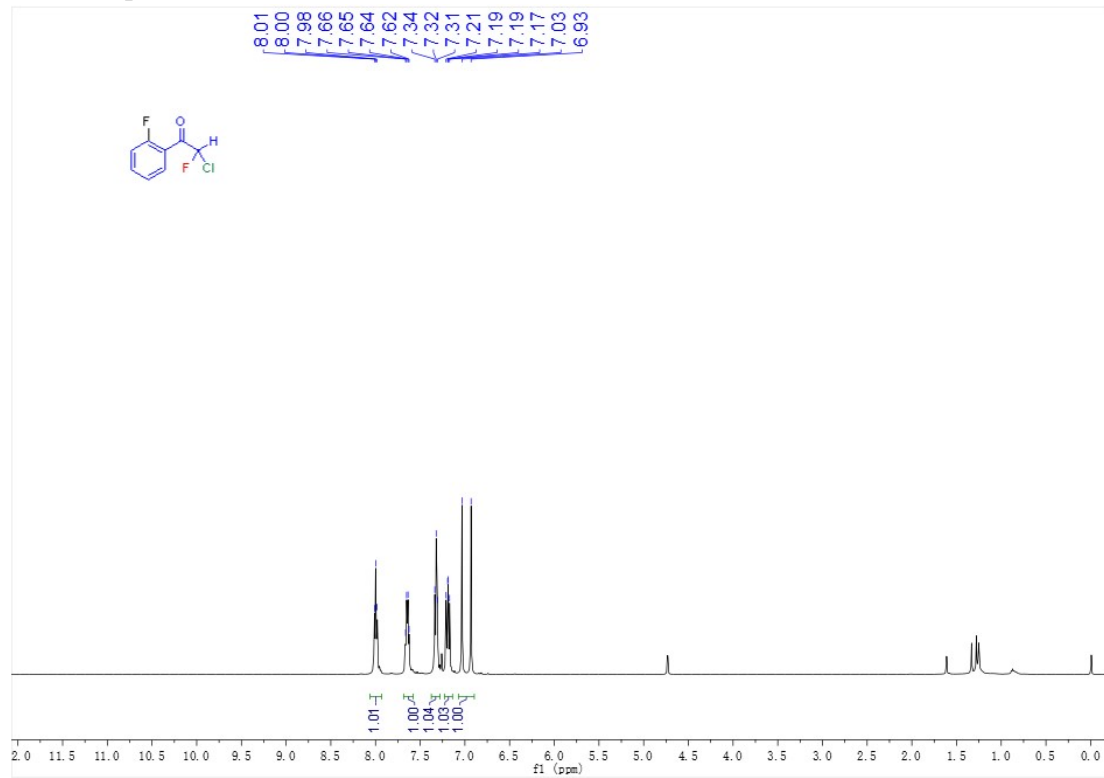

### <sup>13</sup>C NMR spectrum for 2t

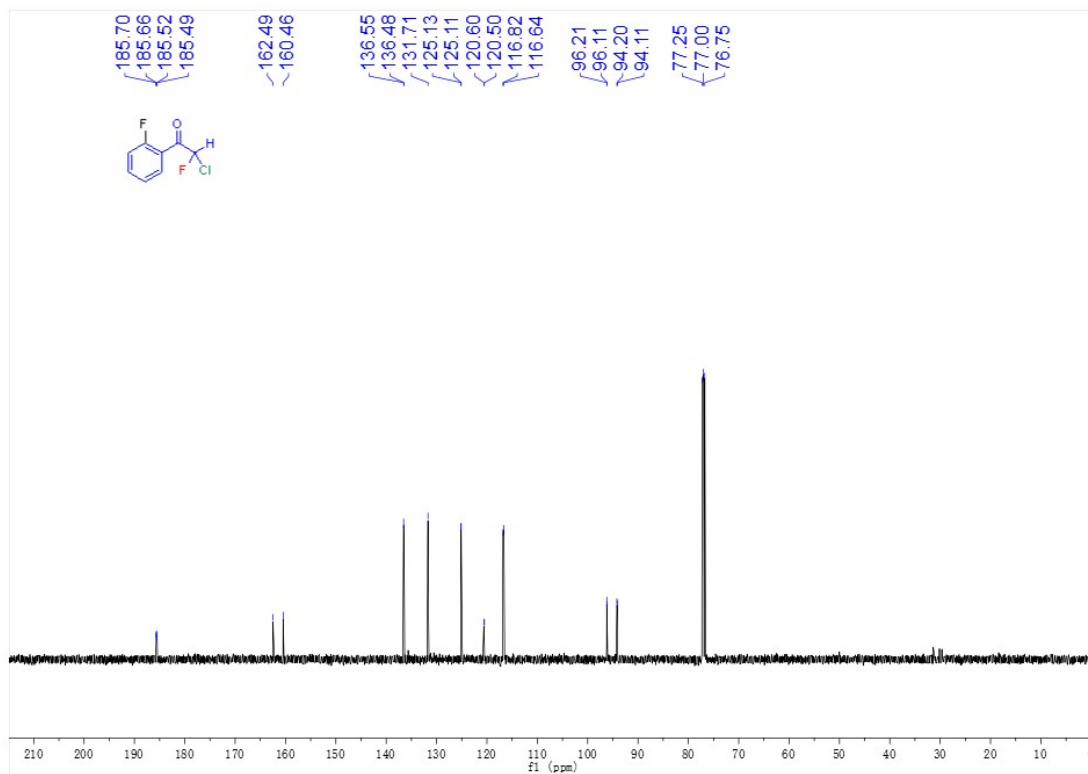

### <sup>19</sup>F NMR spectrum for 2t

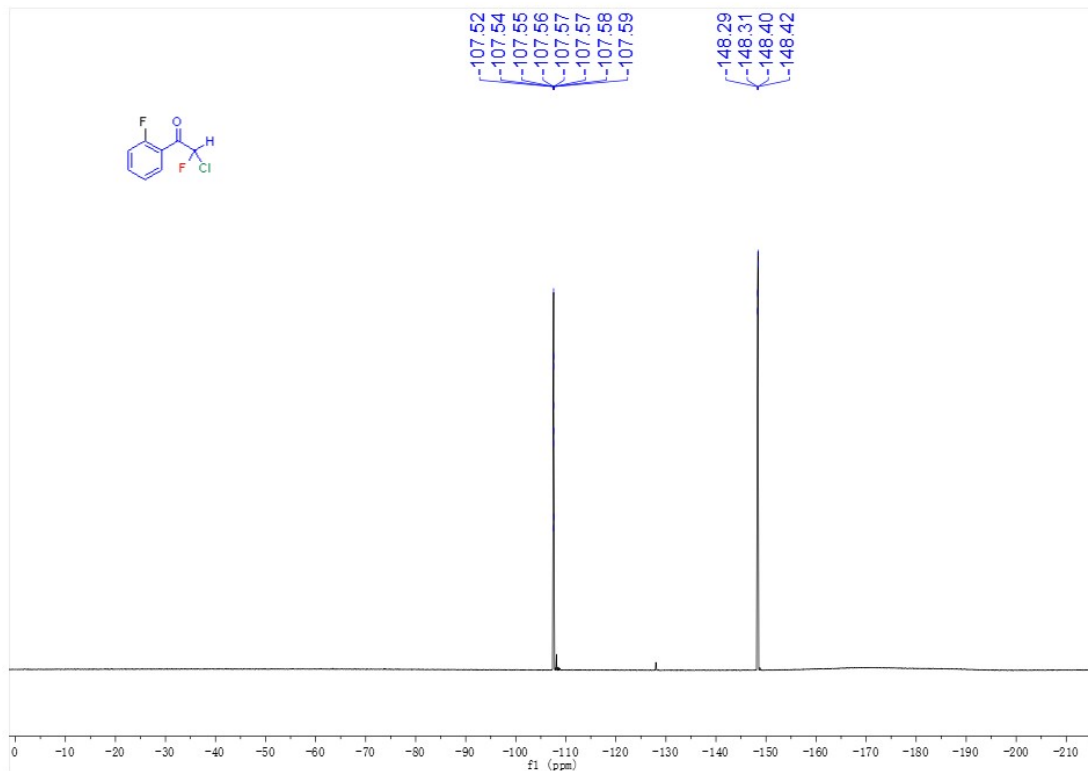

**<sup>1</sup>H NMR spectrum for 2u**

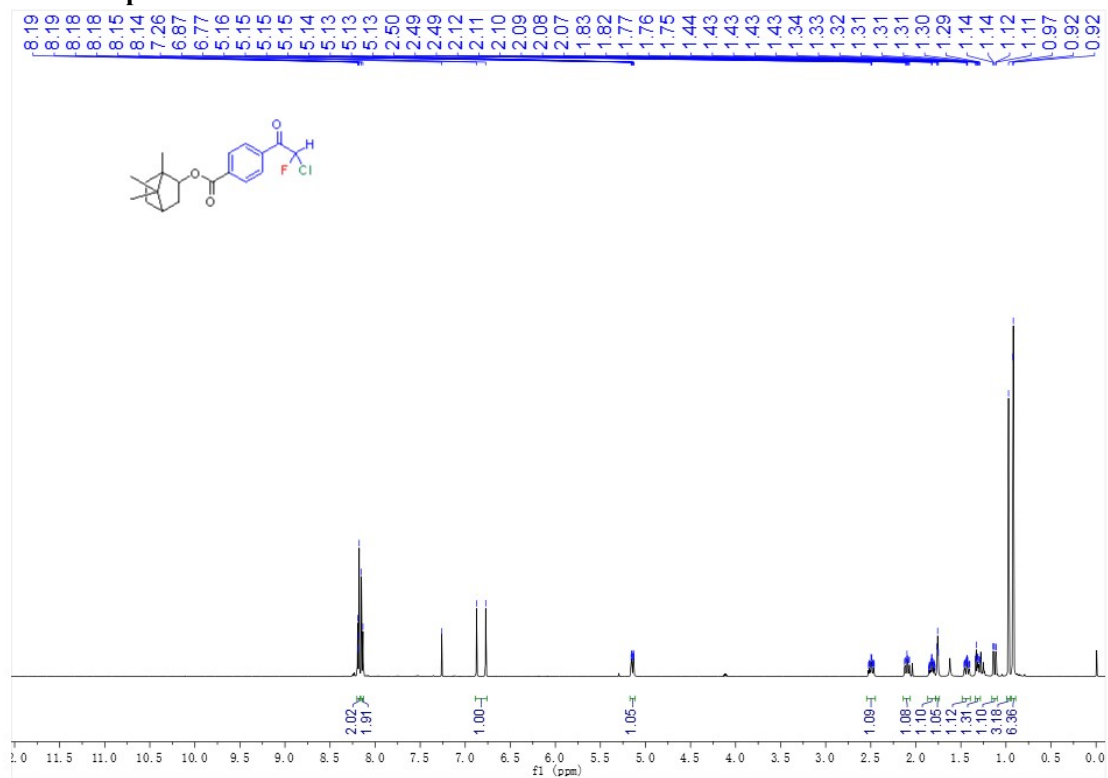

**<sup>13</sup>C NMR spectrum for 2u**

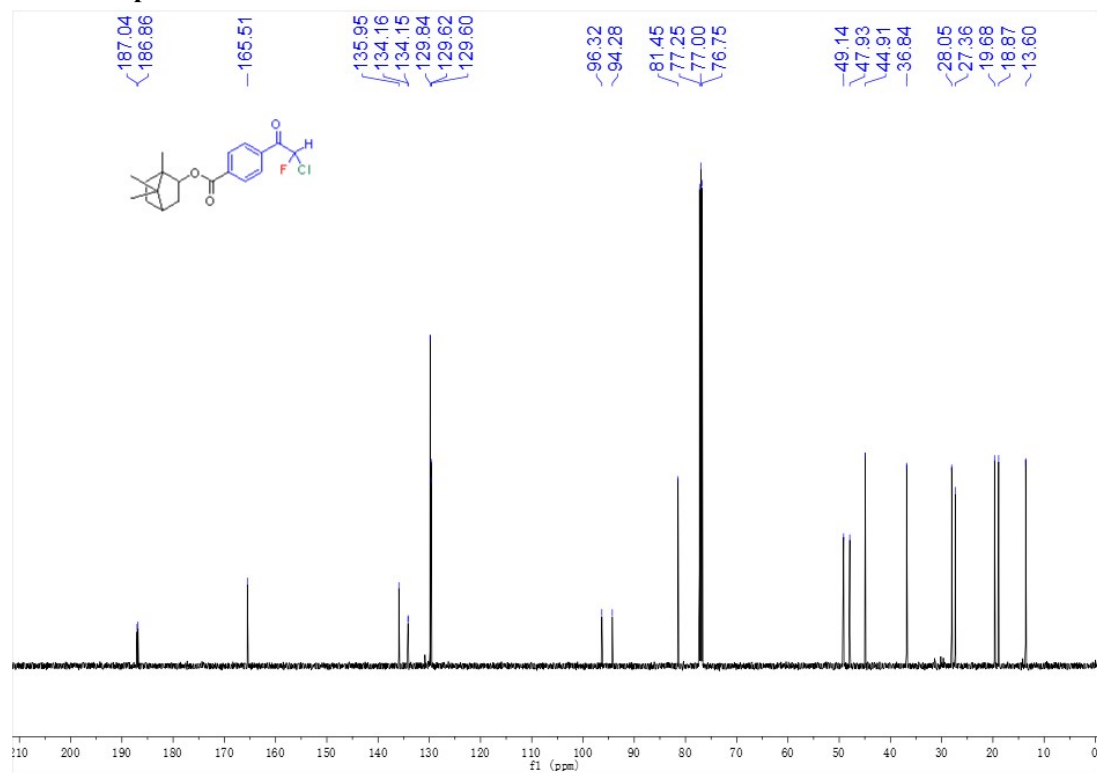

<sup>19</sup>F NMR spectrum for 2u

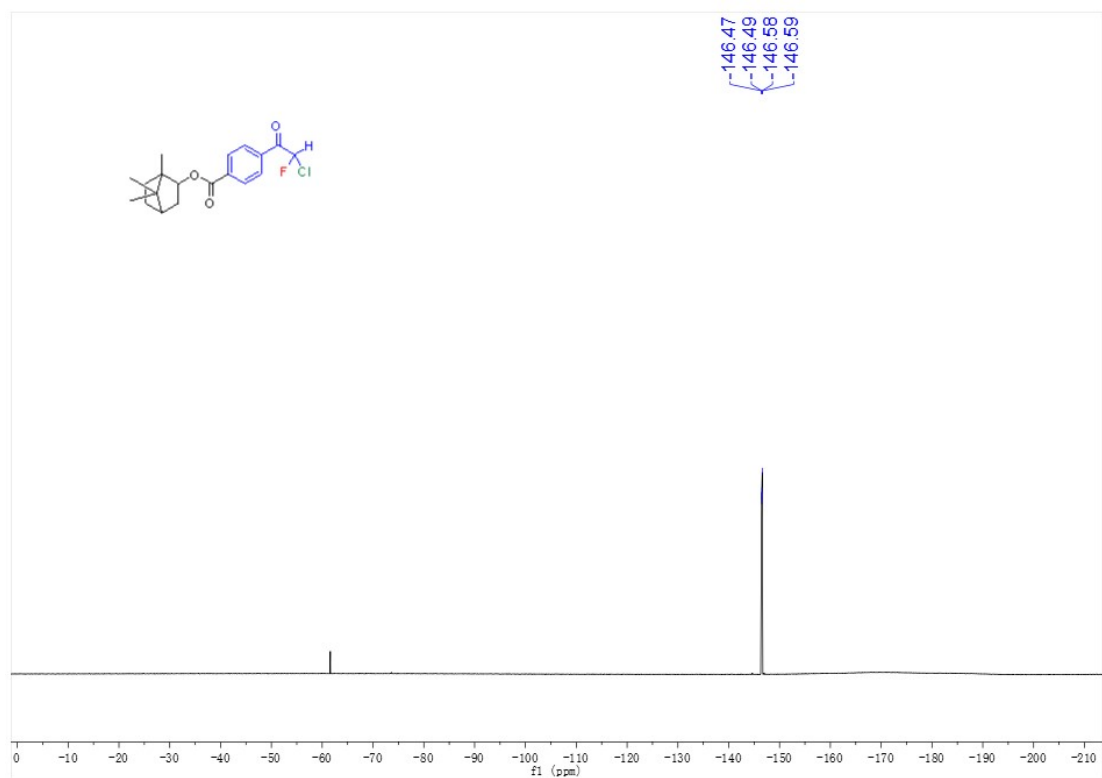

<sup>1</sup>H NMR spectrum for 2v

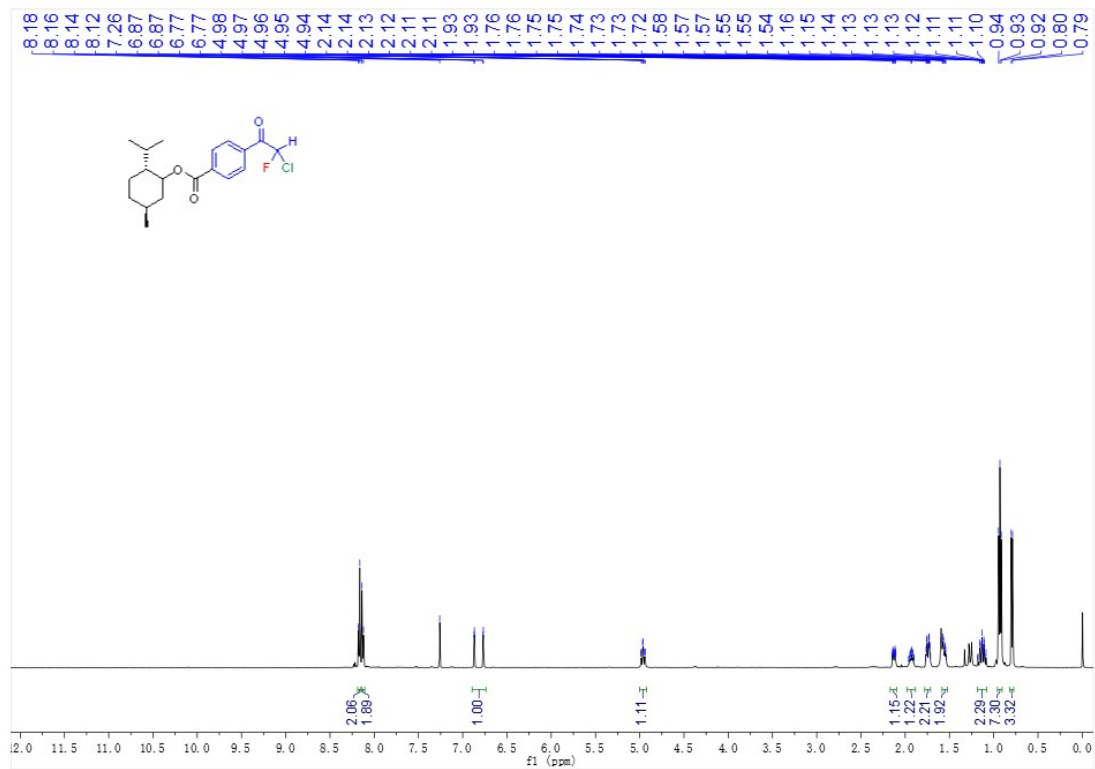

### <sup>13</sup>C NMR spectrum for 2v

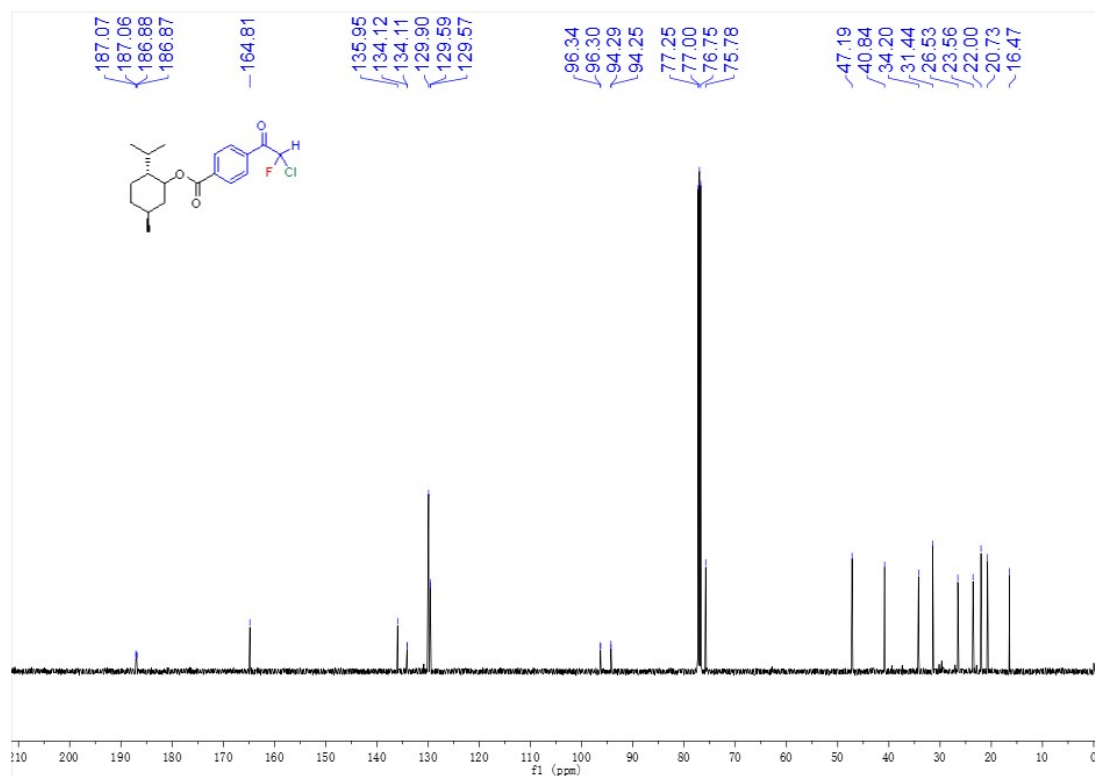

### <sup>19</sup>F NMR spectrum for 2v

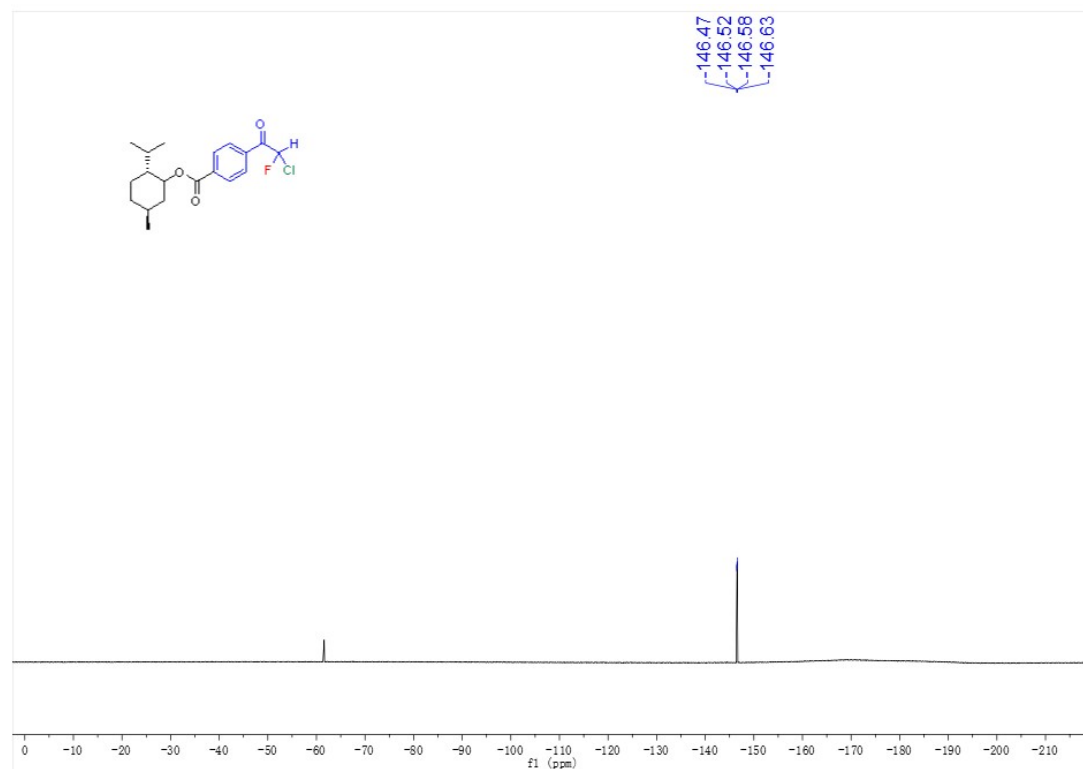

### <sup>1</sup>H NMR spectrum for 2w

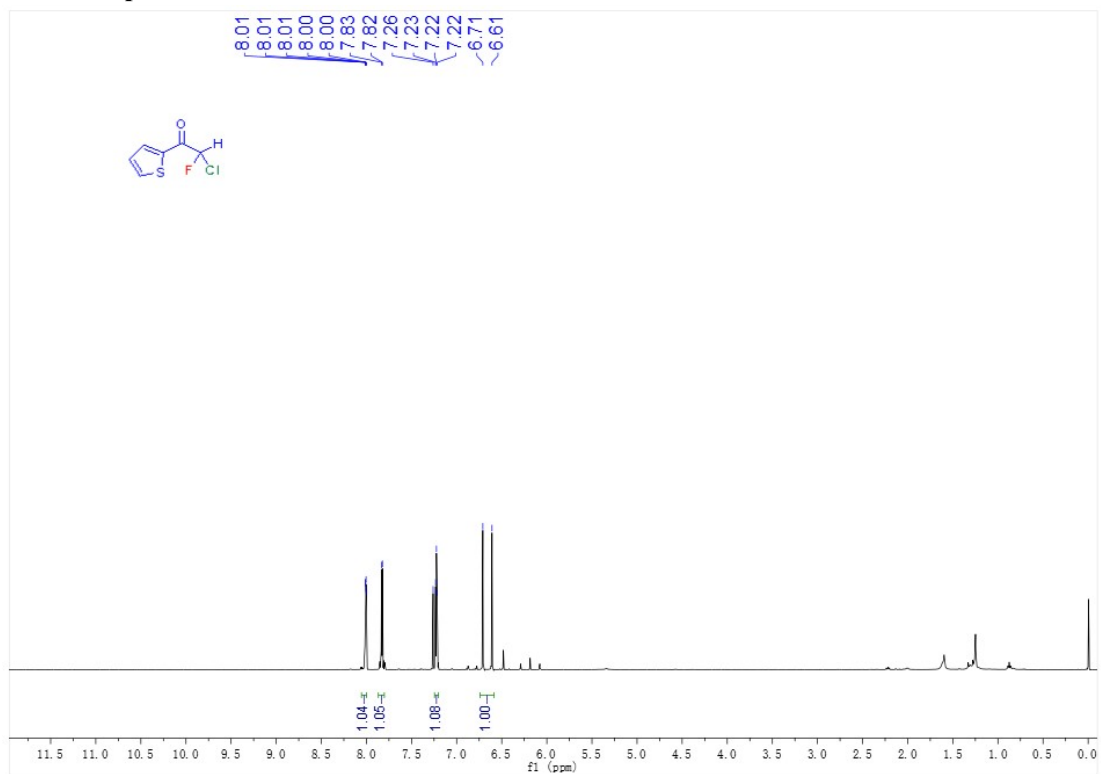

### <sup>13</sup>C NMR spectrum for 2w

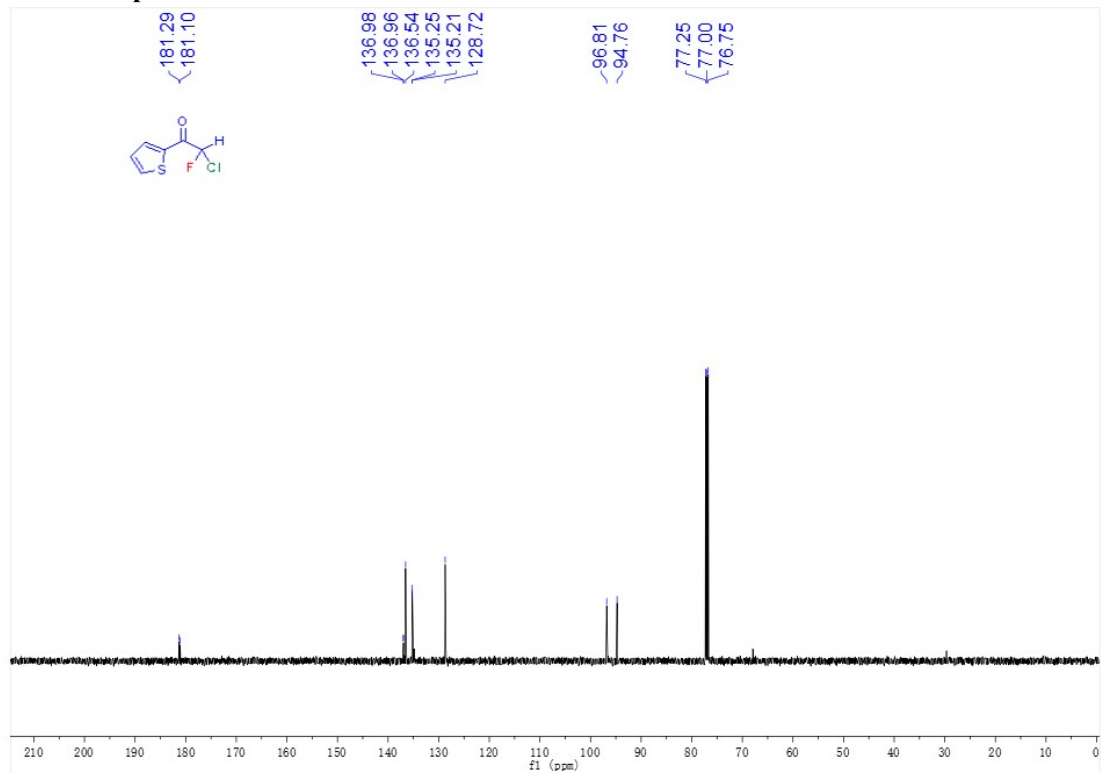



**<sup>19</sup>F NMR spectrum for 2w**

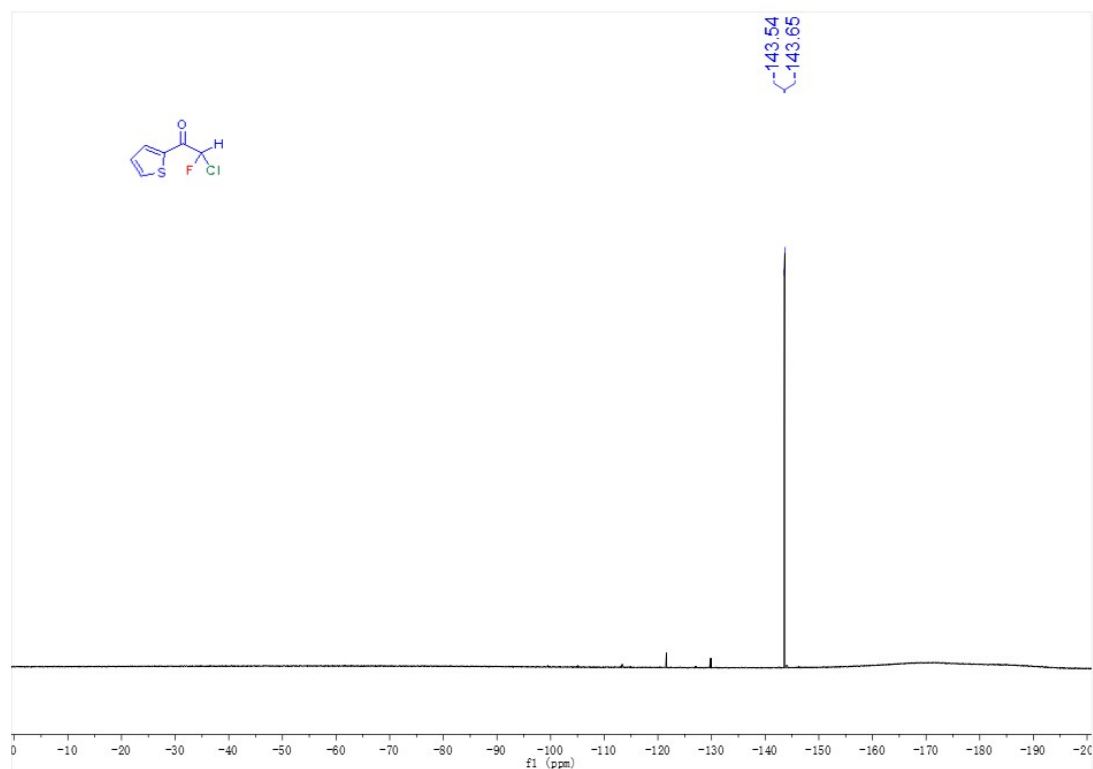

**<sup>1</sup>H NMR spectrum for 2x**

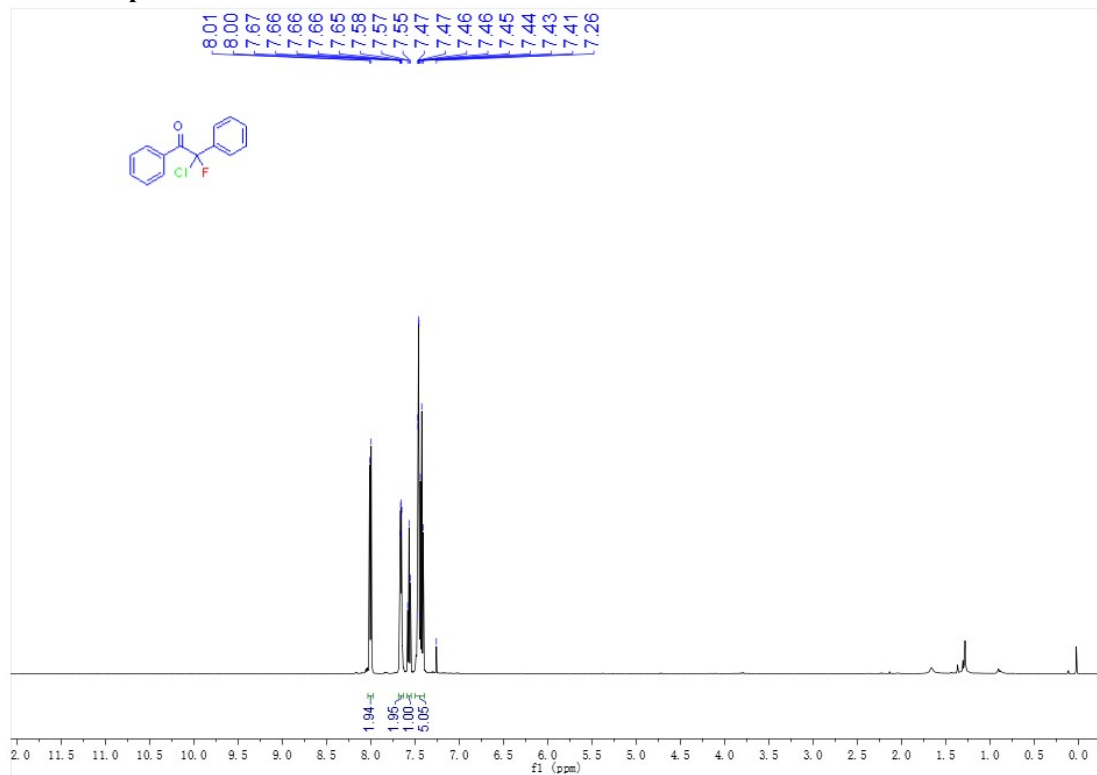

### <sup>13</sup>C NMR spectrum for 2x

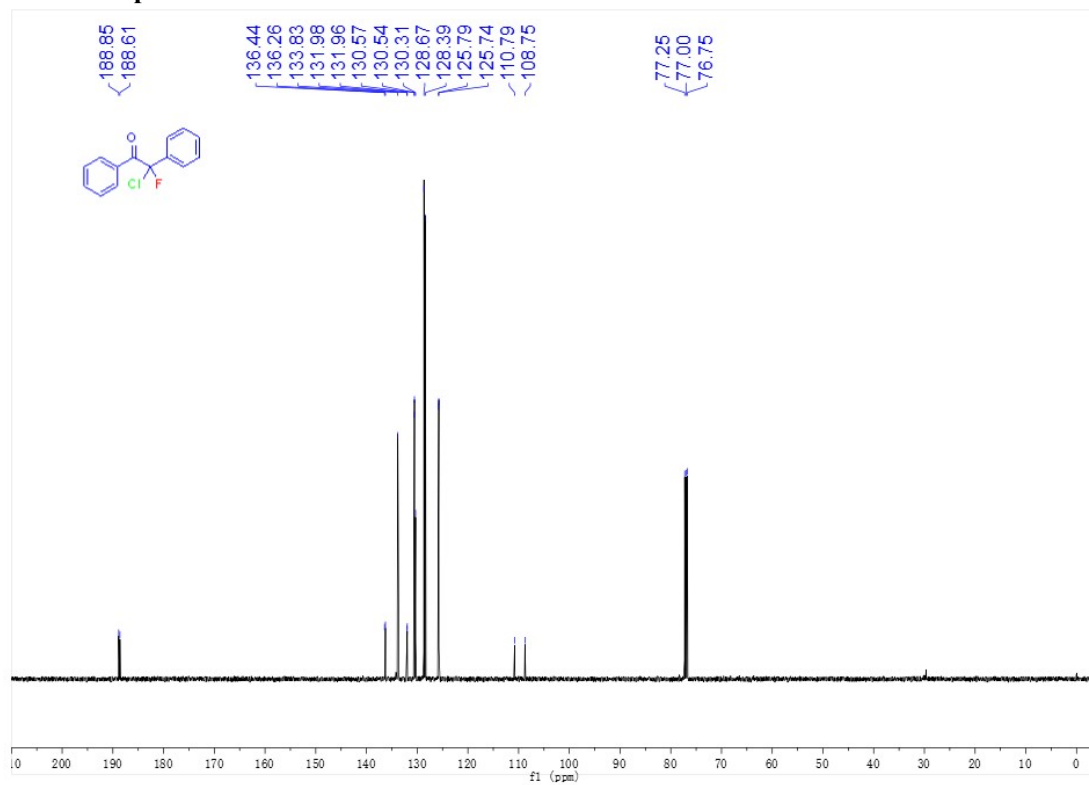

### <sup>19</sup>F NMR spectrum for 2x

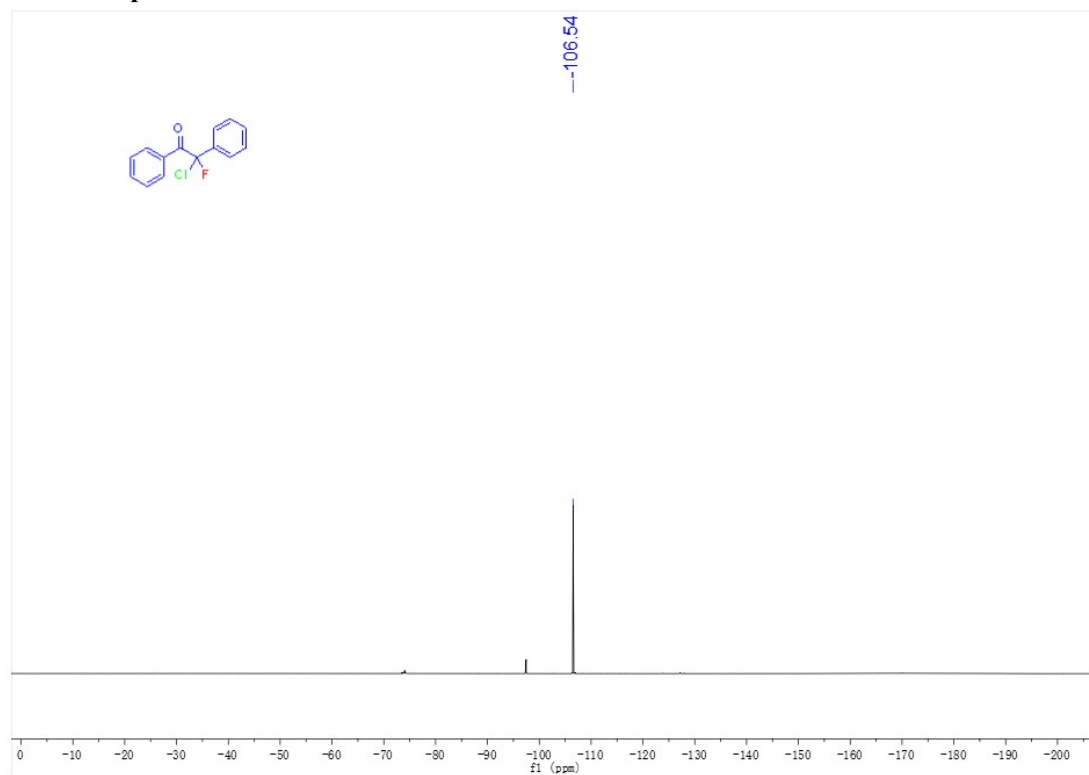

### <sup>1</sup>H NMR spectrum for 2y

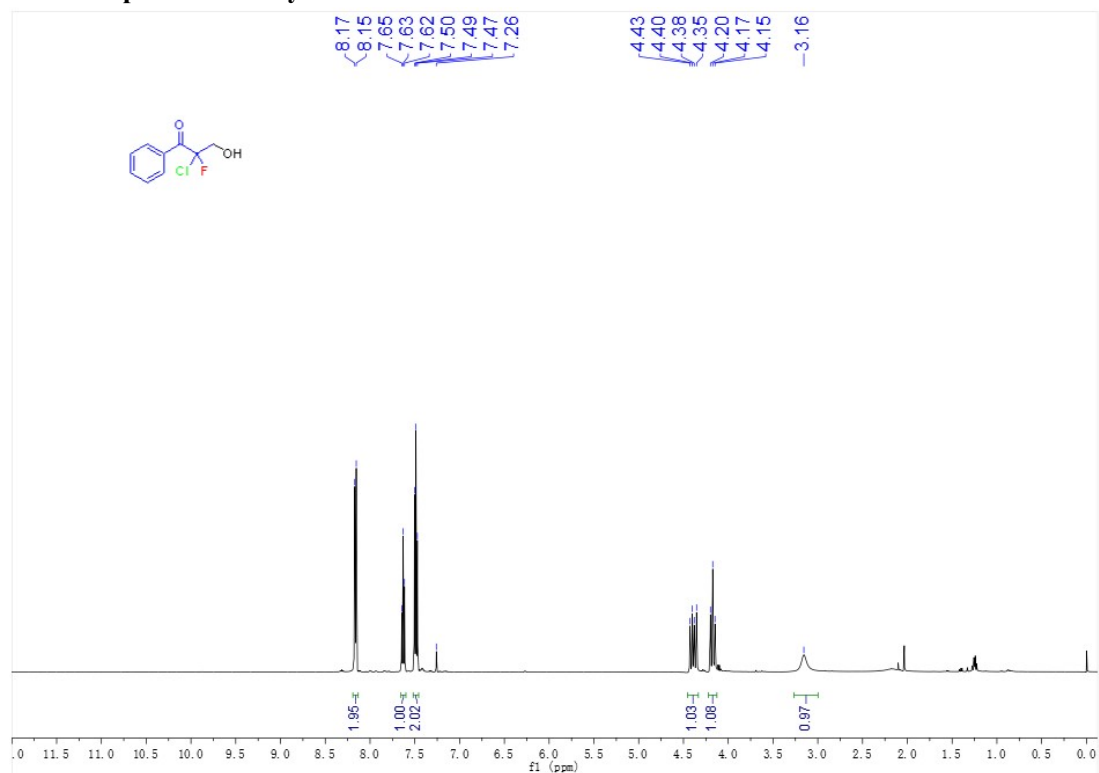

### <sup>13</sup>C NMR spectrum for 2y

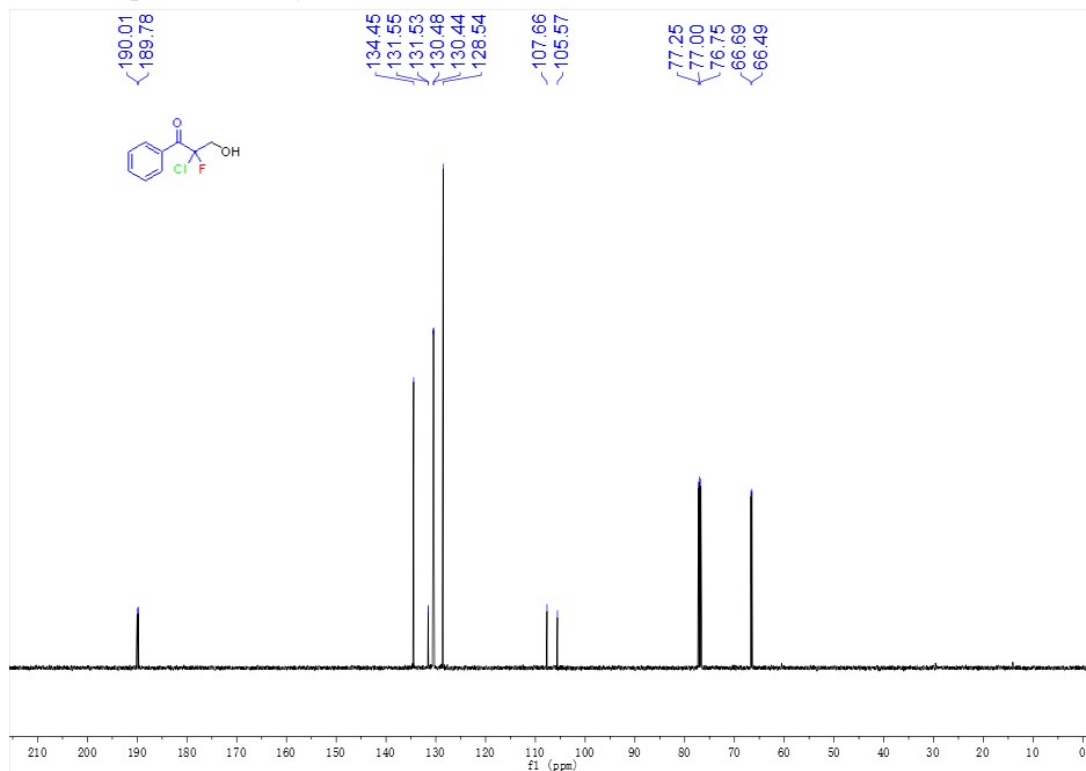

**<sup>19</sup>F NMR spectrum for 2y**

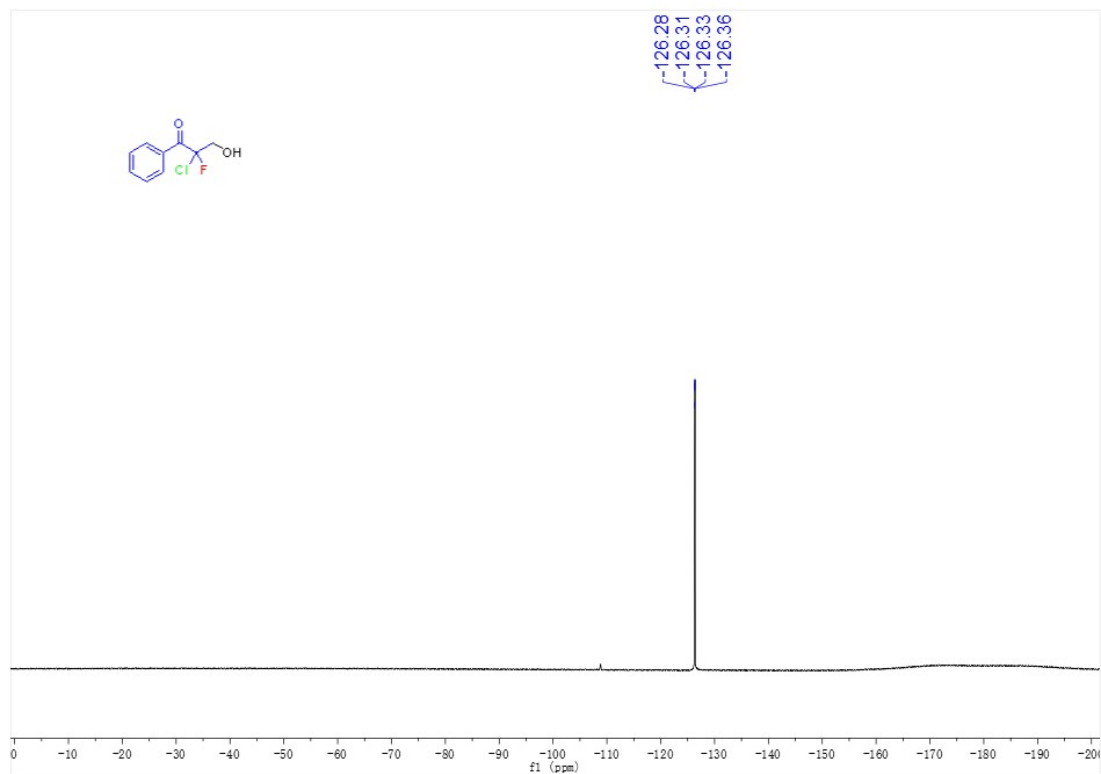

**<sup>1</sup>H NMR spectrum for 2z**

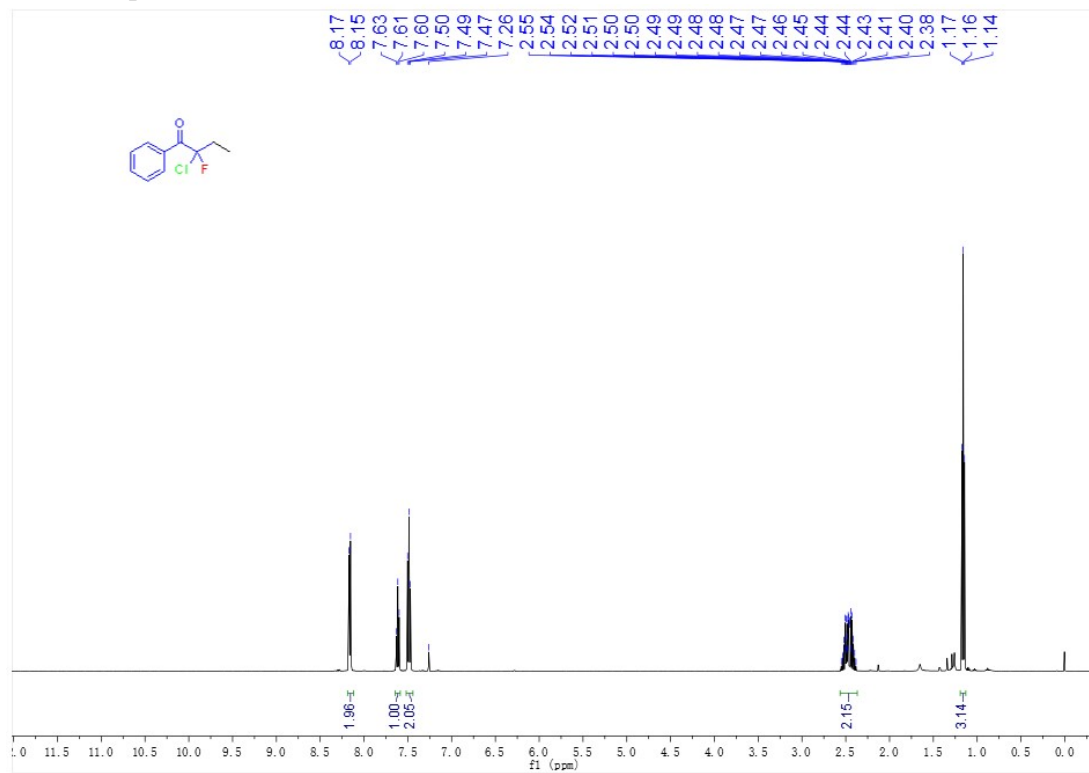

### <sup>13</sup>C NMR spectrum for 2z

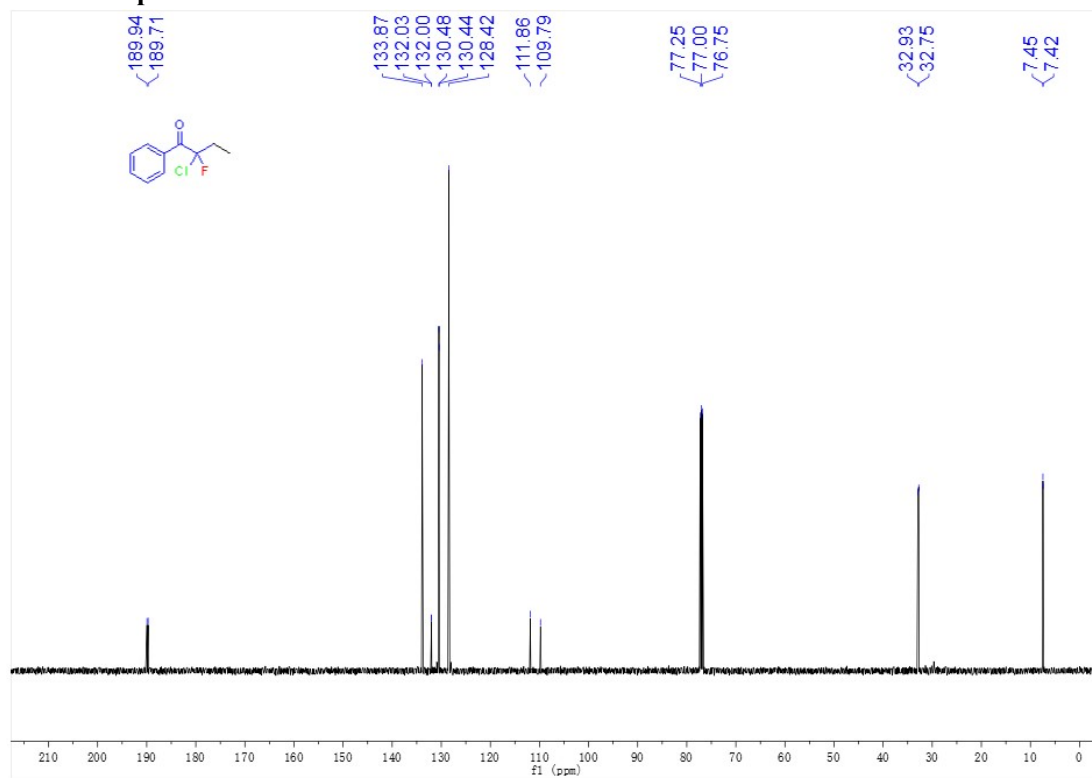

### <sup>19</sup>F NMR spectrum for 2z

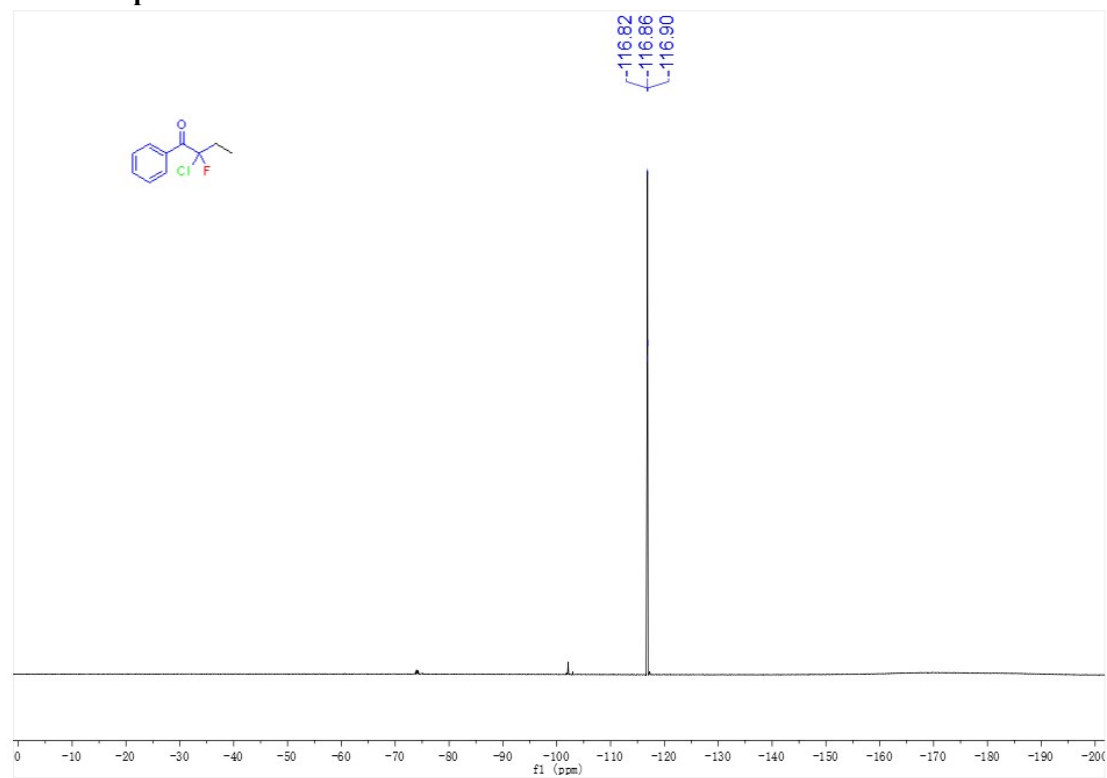

### <sup>1</sup>H NMR spectrum for 1u

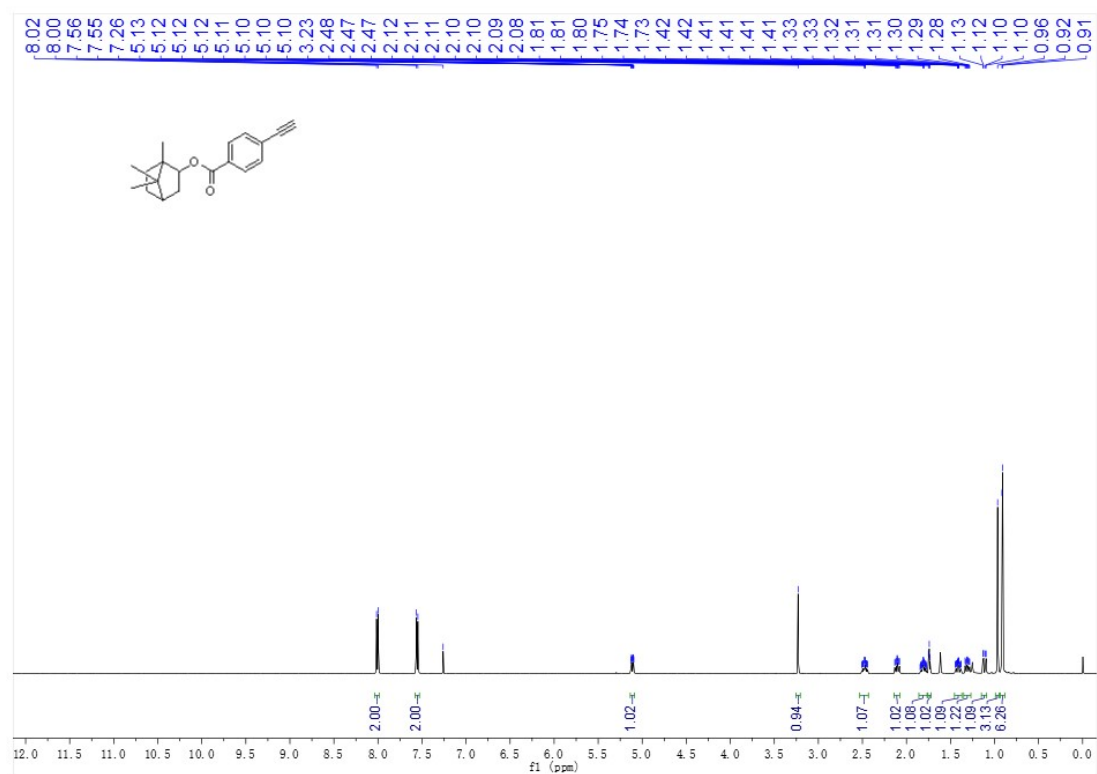

### <sup>13</sup>C NMR spectrum for 1u

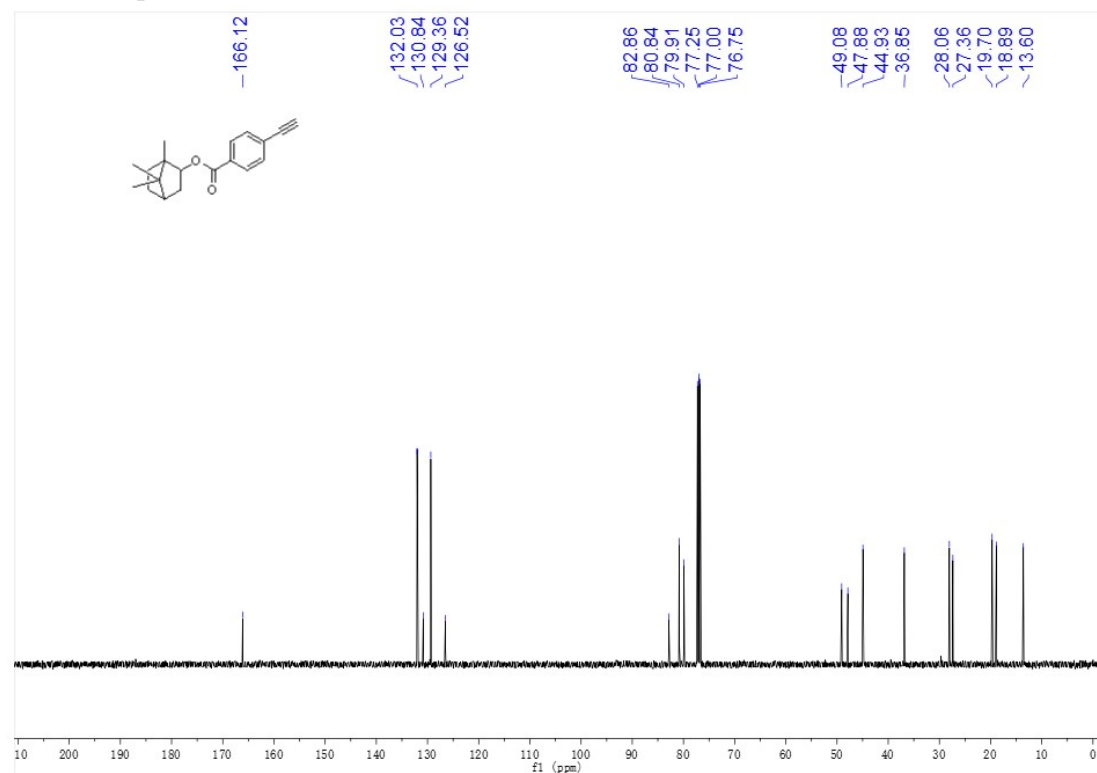

### <sup>1</sup>H NMR spectrum for 1v

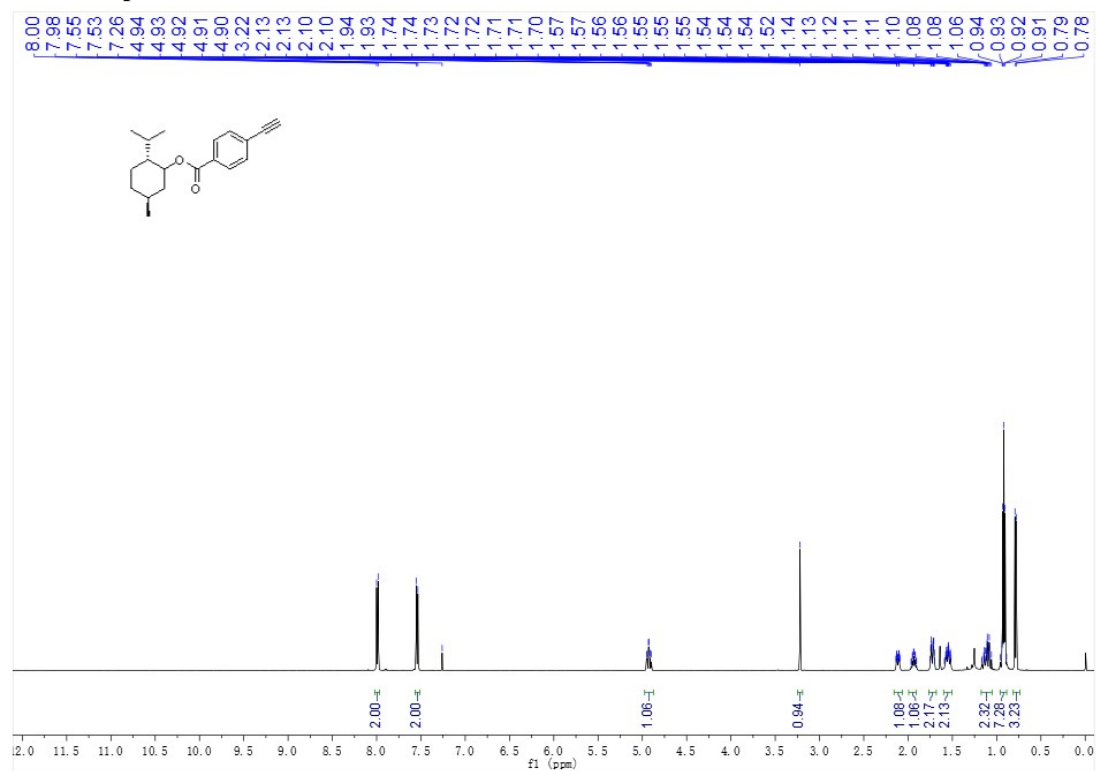

### <sup>13</sup>C NMR spectrum for 1v

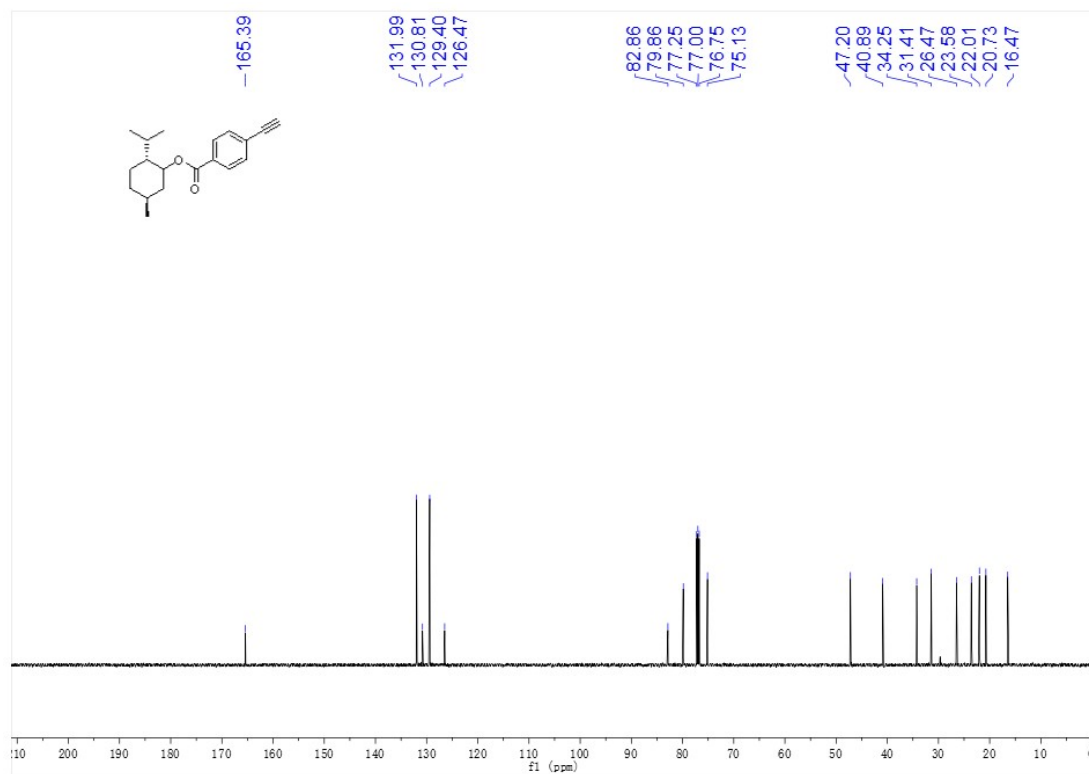

### <sup>1</sup>H NMR spectrum for 3

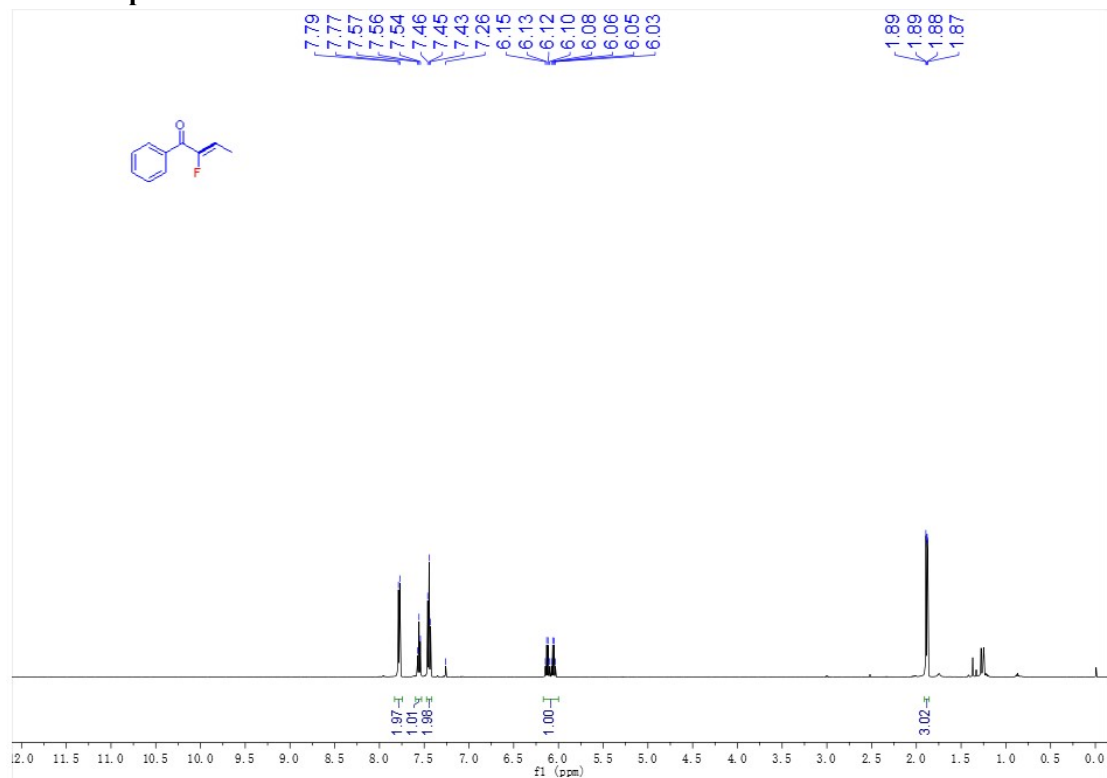

### <sup>13</sup>C NMR spectrum for 3

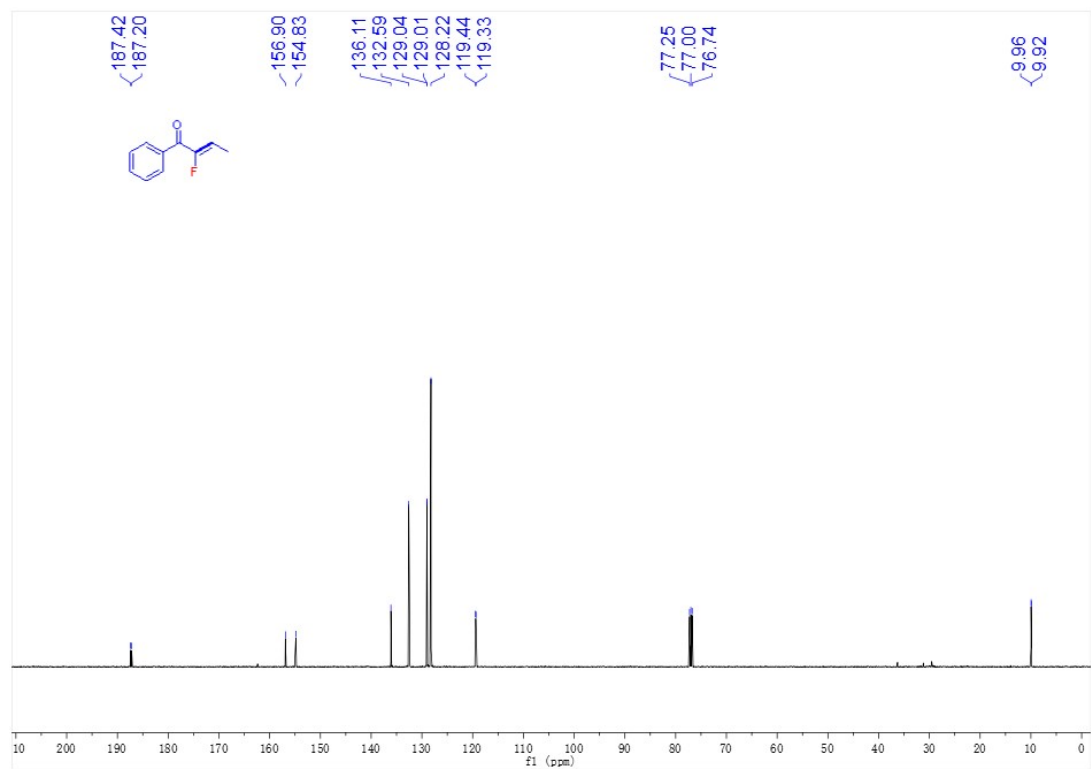



**<sup>19</sup>F NMR spectrum for 3**

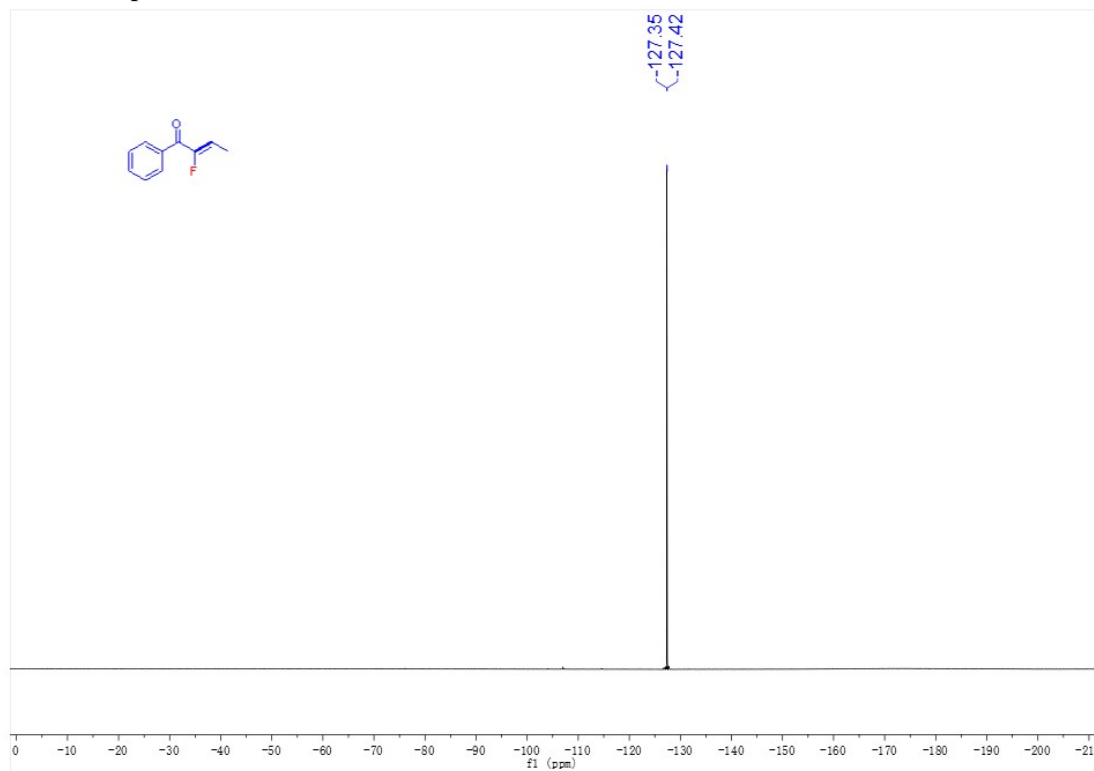

## Theoretical calculations

### General information

Density functional theory (DFT) calculations were carried out using Gaussian 09 program [1]. Geometrical optimization calculations were carried out at the PBE0-D3(BJ) [2, 3]/def2-TZVPD [4, 5] level with the SMD continuum solvent model [6] for CF<sub>3</sub>CH<sub>2</sub>OH without any symmetry assumptions unless otherwise stated. Harmonic vibration frequency calculations were performed at the same level for verifying the resulting geometries as local minima (with all the frequencies real) or saddle points (with only one imaginary frequency). The assignment of the saddle points was performed using the intrinsic reaction coordinate (IRC) calculations. Free energy of **1a**, Cl<sup>-</sup>, F<sup>-</sup> and H<sub>2</sub>O are set as 0 kcal mol<sup>-1</sup>. Free energy of H<sup>+</sup> was calculated in H<sub>5</sub>O<sub>2</sub><sup>+</sup> form.

### Energies of Stationary Points

Supplementary Table 1. Electronic energies (*E*), zero-point energy corrected energies (*E* + *ZPE*), electronic and thermal enthalpies (*H*), Gibbs free energies (*G*) of the stationary points calculated at the PBE0-D3(BJ)/def2-TZVPD level of theory with the SMD continuum solvent model for CF<sub>3</sub>CH<sub>2</sub>OH.

Table S2

|                                            | <i>E</i><br>(Hartree) | <i>E</i> + <i>ZPE</i><br>(Hartree) | <i>H</i><br>(Hartree) | <i>G</i><br>(Hartree) |
|--------------------------------------------|-----------------------|------------------------------------|-----------------------|-----------------------|
| <b>1a</b>                                  | -308.145566           | -308.035683                        | -308.028339           | -308.066095           |
| <b>Selectfluor</b>                         | -943.834859           | -943.610345                        | -943.600049           | -943.644864           |
| <b>2a</b>                                  | -943.255352           | -943.133098                        | -943.122757           | -943.169445           |
| <b>4a</b>                                  | -844.072998           | -843.943010                        | -843.933415           | -843.977988           |
| <b>4a'</b>                                 | -1303.531756          | -1303.411057                       | -1303.400373          | -1303.448211          |
| <b>TS-A</b>                                | -1404.046970          | -1403.824877                       | -1403.812409          | -1403.863591          |
| <b>B</b>                                   | -559.773545           | -559.771679                        | -559.768302           | -559.792988           |
| <b>C</b>                                   | -768.013556           | -767.900672                        | -767.891938           | -767.934296           |
| <b>D</b>                                   | -844.452655           | -844.310068                        | -844.300282           | -844.344445           |
| <b>E</b>                                   | -844.058501           | -843.928826                        | -843.919077           | -843.964204           |
| <b>TS-F</b>                                | -1787.874990          | -1787.521946                       | -1787.501286          | -1787.572515          |
| <b>G</b>                                   | -943.664972           | -943.529935                        | -943.519535           | -943.565673           |
| <b>TS-H</b>                                | -1403.838584          | -1403.706355                       | -1403.693399          | -1403.747983          |
| <b>I</b>                                   | -1303.941435          | -1303.807685                       | -1303.797020          | -1303.844106          |
| <b>J</b>                                   | -844.285895           | -844.067130                        | -844.057595           | -844.100814           |
| H <sub>2</sub> O                           | -76.390849            | -76.369615                         | -76.365835            | -76.387263            |
| H <sub>5</sub> O <sub>2</sub> <sup>+</sup> | -153.221074           | -153.163412                        | -153.158076           | -153.187721           |
| Cl <sup>-</sup>                            | -460.232561           | -460.232561                        | -460.230200           | -460.247583           |

F<sup>-</sup> -99.931714 -99.931714 -99.929354 -99.945873

---

### Cartesian coordinates of the optimized geometries

1a

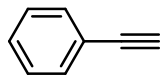

|   |             |             |             |
|---|-------------|-------------|-------------|
| C | -2.19841300 | -0.00003700 | -0.00007000 |
| C | -1.50322900 | 1.20231200  | -0.00004500 |
| C | -0.11852600 | 1.20752500  | 0.00000500  |
| C | 0.58657200  | 0.00002600  | 0.00003300  |
| C | -0.11847200 | -1.20750400 | 0.00000700  |
| C | -1.50317400 | -1.20235400 | -0.00004300 |
| C | 2.01124300  | 0.00006100  | 0.00009700  |
| C | 3.21547300  | 0.00007400  | 0.00010000  |
| H | -3.28274700 | -0.00006200 | -0.00011000 |
| H | -2.04301100 | 2.14264100  | -0.00006500 |
| H | 0.42792200  | 2.14349700  | 0.00002600  |
| H | 0.42801900  | -2.14345200 | 0.00002900  |
| H | -2.04291400 | -2.14270800 | -0.00006100 |
| H | 4.28388800  | -0.00053100 | -0.00032500 |

Selectfluor

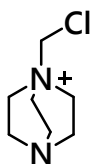

|    |             |             |             |
|----|-------------|-------------|-------------|
| C  | 0.07711300  | -0.39570100 | 1.26500700  |
| C  | 0.02425900  | -0.54488600 | -1.17271200 |
| C  | 0.71650500  | 1.52310700  | -0.09186000 |
| C  | 2.14655600  | 1.00528300  | 0.11988000  |
| N  | -0.22485300 | 0.35255400  | 0.00247400  |
| C  | 1.46831300  | -1.02960400 | 1.11905600  |
| C  | 1.53266300  | -0.83085300 | -1.24064900 |
| C  | -1.59744700 | 0.90940700  | 0.00135000  |
| Cl | -2.84543000 | -0.33540100 | -0.00023600 |
| H  | 0.02740400  | 0.33328300  | 2.07381800  |
| H  | -0.70153700 | -1.14304100 | 1.40432000  |
| H  | -0.55832700 | -1.44941700 | -1.00925500 |
| H  | -0.34683700 | -0.03007000 | -2.05857100 |
| H  | 0.56669000  | 1.95678000  | -1.08043000 |
| H  | 0.41673400  | 2.24315100  | 0.66856200  |
| H  | 2.50837900  | 1.28296500  | 1.11050800  |

|   |             |             |             |
|---|-------------|-------------|-------------|
| H | 2.80398000  | 1.45806700  | -0.62296500 |
| H | 2.03063300  | -0.87528200 | 2.04043000  |
| H | 1.38059100  | -2.10335900 | 0.94939700  |
| H | 1.98807200  | -0.27684600 | -2.06222400 |
| H | 1.68772300  | -1.89490100 | -1.42093500 |
| H | -1.71561800 | 1.51457500  | 0.89737400  |
| H | -1.71334200 | 1.51221900  | -0.89679000 |
| N | 2.19485300  | -0.44495900 | -0.00099800 |

## 2a

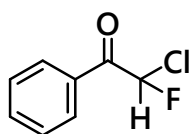

|    |             |             |             |
|----|-------------|-------------|-------------|
| C  | -3.52627700 | -0.33744300 | -0.00957300 |
| C  | -3.08964400 | 0.95492900  | 0.26030300  |
| C  | -1.74039300 | 1.24921200  | 0.21815500  |
| C  | -0.81244100 | 0.24947600  | -0.08384600 |
| C  | -1.25650100 | -1.04732200 | -0.34923600 |
| C  | -2.61098200 | -1.33430800 | -0.31724900 |
| C  | 0.61292700  | 0.62418000  | -0.13307900 |
| C  | 1.62913200  | -0.53182700 | -0.17474200 |
| O  | 0.99011200  | 1.77208200  | -0.15126500 |
| F  | 1.41500400  | -1.35242200 | 0.89807000  |
| Cl | 3.28682000  | 0.05350500  | -0.12166300 |
| H  | -4.58564900 | -0.56731800 | 0.02027300  |
| H  | -3.80561400 | 1.73165600  | 0.50313000  |
| H  | -1.38669600 | 2.25234000  | 0.42542600  |
| H  | -0.55733400 | -1.83693100 | -0.59446700 |
| H  | -2.95262000 | -2.34014300 | -0.53224800 |
| H  | 1.52111300  | -1.11544100 | -1.09075500 |

## 4a

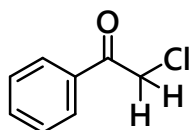

|   |             |             |             |
|---|-------------|-------------|-------------|
| C | -3.40376100 | -0.34141900 | -0.00004200 |
| C | -2.93169100 | 0.96601700  | -0.00004100 |
| C | -1.57041300 | 1.20836200  | -0.00000600 |
| C | -0.66530400 | 0.14565300  | 0.00002800  |
| C | -1.14615300 | -1.16439000 | 0.00002600  |
| C | -2.51088800 | -1.40400300 | -0.00000900 |

|    |             |             |             |
|----|-------------|-------------|-------------|
| C  | 0.78418300  | 0.45919800  | 0.00006500  |
| C  | 1.72836900  | -0.71989800 | 0.00002900  |
| Cl | 3.43043900  | -0.24156500 | -0.00002300 |
| O  | 1.18868200  | 1.60261900  | 0.00001400  |
| H  | -4.47145600 | -0.53171400 | -0.00007000 |
| H  | -3.62901100 | 1.79619600  | -0.00006700 |
| H  | -1.19155600 | 2.22358000  | -0.00000500 |
| H  | -0.46528800 | -2.00707500 | 0.00005200  |
| H  | -2.87805400 | -2.42389200 | -0.00000900 |
| H  | 1.55122400  | -1.33427700 | 0.88412600  |
| H  | 1.55116900  | -1.33427300 | -0.88405900 |

4a'

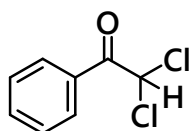

|    |             |             |             |
|----|-------------|-------------|-------------|
| C  | 3.67843100  | -0.35720300 | -0.19876500 |
| C  | 3.29646500  | 0.84219900  | 0.39148800  |
| C  | 1.95908400  | 1.18260200  | 0.45707600  |
| C  | 0.98711100  | 0.32475800  | -0.06401900 |
| C  | 1.37752800  | -0.87989000 | -0.65115800 |
| C  | 2.71957400  | -1.21482600 | -0.71921800 |
| C  | -0.42201000 | 0.75574100  | 0.02863000  |
| C  | -1.50390200 | -0.26410200 | -0.35914600 |
| O  | -0.74405200 | 1.85491000  | 0.41321900  |
| Cl | -3.05045600 | 0.51385600  | -0.65841800 |
| Cl | -1.62252200 | -1.43375300 | 0.97736600  |
| H  | 4.72821300  | -0.62387400 | -0.25209700 |
| H  | 4.04540400  | 1.51028500  | 0.80105100  |
| H  | 1.64853500  | 2.11369200  | 0.91577900  |
| H  | 0.64964700  | -1.56625600 | -1.06479100 |
| H  | 3.01709800  | -2.14916700 | -1.18080800 |
| H  | -1.24955100 | -0.82138600 | -1.25631700 |

**TS-A**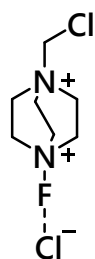

|    |             |             |             |
|----|-------------|-------------|-------------|
| N  | -0.95445600 | 0.09323800  | -0.00345900 |
| C  | 1.06778200  | -0.28239100 | -1.27004800 |
| C  | 1.08459500  | -0.45661100 | 1.17079700  |
| C  | 0.82371200  | 1.71931100  | 0.10109300  |
| C  | -0.68133200 | 1.51151000  | -0.13390100 |
| N  | 1.50908900  | 0.38134500  | 0.00055400  |
| C  | -0.41874400 | -0.64867500 | -1.12978900 |
| C  | -0.45140700 | -0.42286500 | 1.25554200  |
| C  | 2.97015700  | 0.65194700  | 0.00553700  |
| Cl | 3.93776100  | -0.81641400 | -0.00020300 |
| F  | -2.81201800 | -0.12453400 | -0.00245500 |
| H  | 1.24679900  | 0.43184200  | -2.07255600 |
| H  | 1.67930000  | -1.16885400 | -1.42296800 |
| H  | 1.45500100  | -1.46464900 | 0.99816100  |
| H  | 1.54828400  | -0.03974500 | 2.06331100  |
| H  | 1.03818000  | 2.10235700  | 1.09748000  |
| H  | 1.25989000  | 2.37471100  | -0.65094600 |
| H  | -0.97637000 | 1.83254400  | -1.13132400 |
| H  | -1.25387100 | 2.06100100  | 0.61141800  |
| H  | -0.95853000 | -0.37197500 | -2.03399600 |
| H  | -0.55097600 | -1.71227000 | -0.93846200 |
| H  | -0.79206500 | 0.22960900  | 2.05766800  |
| H  | -0.83867100 | -1.42772100 | 1.41438100  |
| H  | 3.20412100  | 1.22671600  | -0.88775900 |
| H  | 3.19887700  | 1.21467300  | 0.90764000  |
| Cl | -4.77322100 | -0.35551900 | 0.00226200  |

**B**

Cl-F

|    |            |            |             |
|----|------------|------------|-------------|
| F  | 0.00000000 | 0.00000000 | -1.06096200 |
| Cl | 0.00000000 | 0.00000000 | 0.56168600  |

C

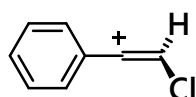

|    |             |             |             |
|----|-------------|-------------|-------------|
| C  | -3.14729800 | -0.00025900 | -0.27850400 |
| C  | -2.48637100 | -1.22640600 | -0.14681500 |
| C  | -1.14558900 | -1.24237200 | 0.11817400  |
| C  | -0.45081800 | 0.00023000  | 0.25394200  |
| C  | -1.14597100 | 1.24256900  | 0.11802600  |
| C  | -2.48674800 | 1.22611700  | -0.14691700 |
| C  | 0.86849900  | 0.00043900  | 0.50275900  |
| C  | 2.13028300  | -0.00003800 | 0.75620300  |
| Cl | 3.30360800  | -0.00005000 | -0.48807400 |
| H  | -4.21105300 | -0.00044500 | -0.49049300 |
| H  | -3.03747000 | -2.15162800 | -0.25597300 |
| H  | -0.59147000 | -2.16615600 | 0.22824700  |
| H  | -0.59215200 | 2.16654300  | 0.22804000  |
| H  | -3.03813700 | 2.15115700  | -0.25613500 |
| H  | 2.49303400  | -0.00029600 | 1.78236100  |

D

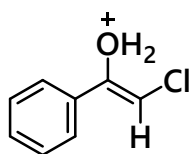

|    |             |             |             |
|----|-------------|-------------|-------------|
| C  | -3.42080700 | -0.28626000 | -0.08956800 |
| C  | -2.86758500 | 0.96284300  | -0.33554000 |
| C  | -1.49610100 | 1.14293600  | -0.27356900 |
| C  | -0.66821500 | 0.06324100  | 0.03984500  |
| C  | -1.22782800 | -1.18789100 | 0.30452300  |
| C  | -2.59873800 | -1.35926300 | 0.22983300  |
| C  | 0.77704200  | 0.22109100  | 0.06955000  |
| C  | 1.69852200  | -0.66764800 | -0.27247800 |
| Cl | 3.37810100  | -0.38699600 | -0.14984000 |
| H  | -4.49507200 | -0.42327200 | -0.14035300 |
| H  | -3.50653500 | 1.80235500  | -0.58437800 |
| H  | -1.06688100 | 2.11548900  | -0.48391100 |
| H  | -0.58835300 | -2.01783500 | 0.58217500  |
| H  | -3.02883400 | -2.33255600 | 0.43647400  |
| H  | 1.41202400  | -1.63137600 | -0.66936400 |
| H  | 0.92153300  | 1.79834500  | 1.36081400  |
| H  | 2.15984900  | 1.69274400  | 0.34405300  |
| O  | 1.19835100  | 1.53009300  | 0.45827300  |

**E**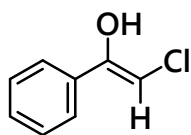

|    |             |             |             |
|----|-------------|-------------|-------------|
| C  | -3.41706000 | -0.29043200 | 0.00004600  |
| C  | -2.88184200 | 0.98782200  | 0.00016000  |
| C  | -1.50664100 | 1.17179000  | 0.00012800  |
| C  | -0.64298700 | 0.07541200  | -0.00002100 |
| C  | -1.19242600 | -1.21000500 | -0.00014300 |
| C  | -2.56383100 | -1.38820900 | -0.00010400 |
| C  | 0.81075500  | 0.30218700  | -0.00005100 |
| C  | 1.71664700  | -0.68357400 | 0.00012400  |
| Cl | 3.40628500  | -0.33775300 | 0.00006000  |
| O  | 1.15201200  | 1.60887800  | -0.00025900 |
| H  | -4.49177600 | -0.43459700 | 0.00006600  |
| H  | -3.53599200 | 1.85286700  | 0.00027400  |
| H  | -1.10093700 | 2.17517000  | 0.00022400  |
| H  | -0.55204600 | -2.08361800 | -0.00028300 |
| H  | -2.97071300 | -2.39337600 | -0.00020500 |
| H  | 1.47672100  | -1.73383200 | 0.00031900  |
| H  | 2.11610300  | 1.69821800  | -0.00017600 |

**TS-F**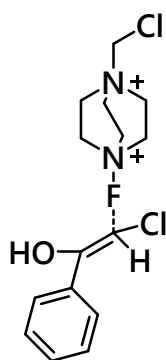

|   |            |             |             |
|---|------------|-------------|-------------|
| N | 0.85409500 | -0.75379600 | -0.23749000 |
| C | 2.46058900 | 0.95482700  | -0.72514600 |
| C | 2.99851400 | -1.39538000 | -1.08835500 |
| C | 2.77393300 | -0.53991600 | 1.18377800  |
| C | 1.35311500 | -1.12164000 | 1.07564800  |
| N | 3.25241300 | -0.20622600 | -0.19989100 |
| C | 0.97026200 | 0.67280000  | -0.47789000 |
| C | 1.48061900 | -1.53265900 | -1.29049800 |
| C | 4.71666500 | 0.05997700  | -0.24463100 |



|    |             |             |             |
|----|-------------|-------------|-------------|
| Cl | 5.20282200  | 1.35163500  | 0.84183600  |
| F  | -0.83705500 | -1.09095600 | -0.26553200 |
| C  | -3.08833800 | 0.86422500  | 0.09415000  |
| C  | -2.66294300 | 1.31095800  | -1.16263800 |
| C  | -2.65383100 | 2.66232400  | -1.45115000 |
| C  | -3.06498700 | 3.58471100  | -0.49642100 |
| C  | -3.48500200 | 3.14954600  | 0.75360700  |
| C  | -3.49519700 | 1.79927900  | 1.05206200  |
| H  | 2.77393200  | 1.85349200  | -0.19875200 |
| H  | 2.69548400  | 1.04248100  | -1.78440100 |
| H  | 3.50404900  | -1.22251500 | -2.03637900 |
| H  | 3.42760300  | -2.26137500 | -0.58769400 |
| H  | 3.46169100  | -1.26431300 | 1.61610900  |
| H  | 2.78411800  | 0.37906200  | 1.76428600  |
| H  | 0.70845300  | -0.68685200 | 1.83745000  |
| H  | 1.35000600  | -2.20724700 | 1.15411100  |
| H  | 0.59433000  | 1.20159000  | 0.39588500  |
| H  | 0.38417600  | 0.93866400  | -1.35625200 |
| H  | 1.17968000  | -2.57434000 | -1.19425000 |
| H  | 1.15986200  | -1.13452300 | -2.25083800 |
| H  | 5.22686700  | -0.85472700 | 0.04931500  |
| H  | 4.97089300  | 0.34545200  | -1.26329700 |
| H  | -2.33046800 | 0.60783200  | -1.91524200 |
| H  | -2.32085100 | 2.99964200  | -2.42587300 |
| H  | -3.05728200 | 4.64397300  | -0.72760400 |
| H  | -3.80831400 | 3.86622500  | 1.49966200  |
| H  | -3.82599600 | 1.46207200  | 2.02601500  |
| C  | -3.09778300 | -0.54830600 | 0.43431200  |
| C  | -2.81009400 | -1.54251000 | -0.48124800 |
| H  | -2.80059400 | -1.36552100 | -1.54403600 |
| O  | -3.34065200 | -0.82218500 | 1.69961600  |
| H  | -3.38972600 | -1.78123800 | 1.84993500  |
| Cl | -2.94093200 | -3.18345900 | -0.02460600 |

G

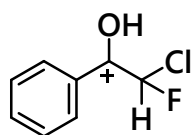

|   |             |             |             |
|---|-------------|-------------|-------------|
| C | -3.53004100 | -0.32243900 | -0.03789500 |
| C | -3.09313300 | 0.98371900  | 0.17840800  |
| C | -1.74901500 | 1.26504800  | 0.16152000  |
| C | -0.82232200 | 0.22594800  | -0.06857800 |
| C | -1.27509800 | -1.09062300 | -0.28752900 |

|    |             |             |             |
|----|-------------|-------------|-------------|
| C  | -2.62579700 | -1.35361700 | -0.27236300 |
| C  | 0.55823400  | 0.52712900  | -0.07621600 |
| C  | 1.59963200  | -0.58590100 | -0.17428800 |
| F  | 1.44926600  | -1.40192800 | 0.89608400  |
| Cl | 3.24268500  | 0.05119400  | -0.19484000 |
| H  | -4.59264600 | -0.53797400 | -0.02456900 |
| H  | -3.81097300 | 1.77371000  | 0.36079100  |
| H  | -1.39381900 | 2.27293100  | 0.33460700  |
| H  | -0.57851900 | -1.89593500 | -0.48177500 |
| H  | -2.98233500 | -2.36135100 | -0.44469400 |
| H  | 1.45778600  | -1.15100600 | -1.09760200 |
| O  | 0.93115700  | 1.73864600  | 0.00517100  |
| H  | 1.90745900  | 1.84191100  | 0.02104500  |

### TS-H

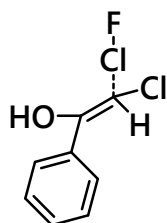

|    |             |             |             |
|----|-------------|-------------|-------------|
| F  | 0.42815100  | 3.72019400  | 0.16796300  |
| Cl | 0.22601500  | 2.09926000  | 0.08443000  |
| C  | -1.77266700 | -0.49350800 | -0.65414600 |
| C  | -0.91538600 | -0.95757000 | 0.26433800  |
| Cl | -3.46951400 | -0.47069200 | -0.36447400 |
| O  | -1.28764500 | -1.40903600 | 1.47773200  |
| C  | 0.53992400  | -0.98053800 | 0.04423500  |
| C  | 1.08098600  | -0.99813000 | -1.24436000 |
| C  | 2.45223500  | -0.97376000 | -1.42655000 |
| C  | 3.30471000  | -0.94670700 | -0.32953100 |
| C  | 2.77527300  | -0.95086400 | 0.95303900  |
| C  | 1.40276700  | -0.96957900 | 1.14246900  |
| H  | -1.46928600 | -0.10222600 | -1.61188600 |
| H  | -2.24316000 | -1.30557300 | 1.59743200  |
| H  | 0.42665200  | -1.04648300 | -2.10694400 |
| H  | 2.85860400  | -0.98804800 | -2.43164700 |
| H  | 4.37899200  | -0.93199000 | -0.47589600 |
| H  | 3.43438200  | -0.93603700 | 1.81394700  |
| H  | 0.99405600  | -0.96083000 | 2.14525800  |

**I**

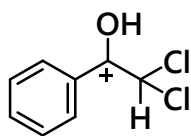

|    |             |             |             |
|----|-------------|-------------|-------------|
| C  | -3.68603900 | 0.34824100  | -0.20966800 |
| C  | -3.30099400 | -0.88219100 | 0.31938000  |
| C  | -1.96751000 | -1.20116500 | 0.40593400  |
| C  | -0.99865100 | -0.28154200 | -0.04820300 |
| C  | -1.40010300 | 0.95698600  | -0.58534100 |
| C  | -2.73942800 | 1.26383300  | -0.65872000 |
| C  | 0.37073200  | -0.62721200 | 0.05582500  |
| C  | 1.47323400  | 0.31782300  | -0.37106000 |
| Cl | 2.95022400  | -0.55181000 | -0.77316800 |
| Cl | 1.71962900  | 1.43174400  | 0.98351000  |
| H  | -4.73978600 | 0.59583300  | -0.27309100 |
| H  | -4.05006700 | -1.58454300 | 0.66327100  |
| H  | -1.65459800 | -2.15196900 | 0.81769700  |
| H  | -0.67609700 | 1.67884500  | -0.93989800 |
| H  | -3.05369000 | 2.21605400  | -1.06706700 |
| H  | 1.18933900  | 0.89537100  | -1.24581900 |
| O  | 0.68067700  | -1.75581500 | 0.55692400  |
| H  | 1.64454100  | -1.93057500 | 0.56482100  |

**J**

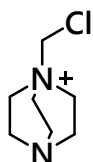

|    |             |             |             |
|----|-------------|-------------|-------------|
| C  | 0.07711300  | -0.39570100 | 1.26500700  |
| C  | 0.02425900  | -0.54488600 | -1.17271200 |
| C  | 0.71650500  | 1.52310700  | -0.09186000 |
| C  | 2.14655600  | 1.00528300  | 0.11988000  |
| N  | -0.22485300 | 0.35255400  | 0.00247400  |
| C  | 1.46831300  | -1.02960400 | 1.11905600  |
| C  | 1.53266300  | -0.83085300 | -1.24064900 |
| C  | -1.59744700 | 0.90940700  | 0.00135000  |
| Cl | -2.84543000 | -0.33540100 | -0.00023600 |
| H  | 0.02740400  | 0.33328300  | 2.07381800  |
| H  | -0.70153700 | -1.14304100 | 1.40432000  |
| H  | -0.55832700 | -1.44941700 | -1.00925500 |
| H  | -0.34683700 | -0.03007000 | -2.05857100 |
| H  | 0.56669000  | 1.95678000  | -1.08043000 |
| H  | 0.41673400  | 2.24315100  | 0.66856200  |

|                                            |             |             |             |
|--------------------------------------------|-------------|-------------|-------------|
| H                                          | 2.50837900  | 1.28296500  | 1.11050800  |
| H                                          | 2.80398000  | 1.45806700  | -0.62296500 |
| H                                          | 2.03063300  | -0.87528200 | 2.04043000  |
| H                                          | 1.38059100  | -2.10335900 | 0.94939700  |
| H                                          | 1.98807200  | -0.27684600 | -2.06222400 |
| H                                          | 1.68772300  | -1.89490100 | -1.42093500 |
| H                                          | -1.71561800 | 1.51457500  | 0.89737400  |
| H                                          | -1.71334200 | 1.51221900  | -0.89679000 |
| N                                          | 2.19485300  | -0.44495900 | -0.00099800 |
| H <sub>2</sub> O                           |             |             |             |
| O                                          | 0.00000000  | 0.00000000  | 0.11804000  |
| H                                          | 0.00000000  | 0.76117400  | -0.47215800 |
| H                                          | 0.00000000  | -0.76117400 | -0.47215800 |
| H <sub>5</sub> O <sub>2</sub> <sup>+</sup> |             |             |             |
| O                                          | 1.19500500  | -0.03909500 | -0.09547100 |
| O                                          | -1.19539100 | -0.03919000 | 0.09545100  |
| H                                          | 0.00532600  | -0.00008800 | -0.00049400 |
| H                                          | 1.58038700  | 0.84901400  | -0.06448100 |
| H                                          | 1.57513400  | -0.53603600 | 0.64430100  |
| H                                          | -1.58152300 | 0.84840900  | 0.06528700  |
| H                                          | -1.57623900 | -0.53501200 | -0.64445200 |

## References

1. Frisch, M. J.; Trucks, G. W.; Schlegel, H. B.; Scuseria, G. E.; Robb, M. A.; Cheeseman, J. R.; Scalmani, G.; Barone, V.; Mennucci, B.; Petersson, G. A.; Nakatsuji, H.; Caricato, M.; Li, X.; Hratchian, H. P.; Izmaylov, A. F.; Bloino, J.; Zheng, G.; Sonnenberg, J. L.; Hada, M.; Ehara, M.; Toyota, K.; Fukuda, R.; Hasegawa, J.; Ishida, M.; Nakajima, T.; Honda, Y.; Kitao, O.; Nakai, H.; Vreven, T.; Montgomery, J. A., Jr.; Peralta, J. E.; Ogliaro, F.; Bearpark, M.; Heyd, J. J.; Brothers, E.; Kudin, K. N.; Staroverov, V. N.; Kobayashi, R.; Normand, J.; Raghavachari, K.; Rendell, A.; Burant, J. C.; Iyengar, S. S.; Tomasi, J.; Cossi, M.; Rega, N.; Millam, N. J.; Klene, M.; Knox, J. E.; Cross, J. B.; Bakken, V.; Adamo, C.; Jaramillo, J.; Gomperts, R.; Stratmann, R. E.; Yazyev, O.; Austin, A. J.; Cammi, R.; Pomelli, C.; Ochterski, J. W.; Martin, R. L.; Morokuma, K.; Zakrzewski, V. G.; Voth, G. A.; Salvador, P.; Dannenberg, J. J.; Dapprich, S.; Daniels, A. D.; Farkas, Ö.; Foresman, J. B.; Ortiz, J. V.; Cioslowski, J., & Fox, D. J. Gaussian, Inc., Gaussian 09, Revision E.01. Wallingford CT (2013).
2. Adamo, C., & Barone, V. Toward reliable density functional methods without adjustable parameters: The PBE0 model. *J. Chem. Phys.* **110**, 6158-6170 (1999).
3. Grimme, S.; Antony, J.; Ehrlich, S., & Krieg, H. A consistent and accurate *ab initio* parametrization of density functional dispersion correction (DFT-D) for the 94 elements H-Pu. *J. Chem. Phys.* **132**, 154104 (2010).
4. Weigend, F., & Ahlrichs, R. Balanced basis sets of split valence, triple zeta valence and

quadruple zeta valence quality for H to Rn: Design and assessment of accuracy. *Phys. Chem. Chem. Phys.* **7**, 3297-3305 (2005).

5. Rappoport, D., & Furche, F. Property-optimized Gaussian basis sets for molecular response calculations. *J. Chem. Phys.* **133**, 134105 (2010).

6. Marenich, A. V.; Cramer, C. J., & Truhlar, D. G. Universal solvation model based on solute electron density and on a continuum model of the solvent defined by the bulk dielectric constant and atomic surface tensions. *J. Phys. Chem. B.* **113**, 6378-6396 (2009).
